# Supplementary material
Source: publisher figshare collection journal article supplement (https://acs.figshare.com/ndownloader/files/5076553)
Supplement: Supplementary file 1 [file 5076553]

Title:Strong Electronic Interaction between Two Dimolybdenum Units Linked by a Tetraazatetracene
Author:F. Albert Cotton, Zhong Li, Chun Yuan Liu, Carlos A. Murillo and Dino Villagr��n
============compound 1================================
data_xl 
  
_audit_creation_method            SHELXL-97 
_chemical_name_systematic 
; 
 ? 
; 
_chemical_name_common            '[Mo2(DAnif)3]2(C14H8N4),4CH2Cl2' 
_chemical_melting_point           ? 
_chemical_formula_moiety         'C104 H98 Mo4 N16 O12,4(C H2 Cl2)' 
_chemical_formula_sum 
 'C108 H106 Cl8 Mo4 N16 O12' 
_chemical_formula_weight          2487.45 
  
loop_ 
 _atom_type_symbol 
 _atom_type_description 
 _atom_type_scat_dispersion_real 
 _atom_type_scat_dispersion_imag 
 _atom_type_scat_source 
 'C'  'C'   0.0033   0.0016 
 'International Tables Vol C Tables 4.2.6.8 and 6.1.1.4' 
 'H'  'H'   0.0000   0.0000 
 'International Tables Vol C Tables 4.2.6.8 and 6.1.1.4' 
 'N'  'N'   0.0061   0.0033 
 'International Tables Vol C Tables 4.2.6.8 and 6.1.1.4' 
 'O'  'O'   0.0106   0.0060 
 'International Tables Vol C Tables 4.2.6.8 and 6.1.1.4' 
 'Mo'  'Mo'  -1.6832   0.6857 
 'International Tables Vol C Tables 4.2.6.8 and 6.1.1.4' 
 'Cl'  'Cl'   0.1484   0.1585 
 'International Tables Vol C Tables 4.2.6.8 and 6.1.1.4' 
  
_symmetry_cell_setting            'Triclinic' 
_symmetry_space_group_name_H-M    'P -1' 
  
loop_ 
 _symmetry_equiv_pos_as_xyz 
 'x, y, z' 
 '-x, -y, -z' 
  
_cell_length_a                    12.3728(8) 
_cell_length_b                    15.8644(10) 
_cell_length_c                    15.9487(10) 
_cell_angle_alpha                 60.3200(10) 
_cell_angle_beta                  89.8580(10) 
_cell_angle_gamma                 84.8970(10) 
_cell_volume                      2705.9(3) 
_cell_formula_units_Z             1 
_cell_measurement_temperature     213(2) 
_cell_measurement_reflns_used     7516 
_cell_measurement_theta_min       2.162 
_cell_measurement_theta_max       25.989 
  
_exptl_crystal_description        niddle 
_exptl_crystal_colour             'orange' 
_exptl_crystal_size_max           0.40 
_exptl_crystal_size_mid           0.36 
_exptl_crystal_size_min           0.10 
_exptl_crystal_density_meas       ? 
_exptl_crystal_density_diffrn     1.526 
_exptl_crystal_density_method     'not measured' 
_exptl_crystal_F_000              1266 
_exptl_absorpt_coefficient_mu     0.718 
_exptl_absorpt_correction_type    'multi-scan' 
_exptl_absorpt_correction_T_min   0.7621 
_exptl_absorpt_correction_T_max   0.9316 
_exptl_absorpt_process_details    SADABS 
  
_exptl_special_details 
; 
 ? 
; 
  
_diffrn_ambient_temperature       213(2) 
_diffrn_radiation_wavelength      0.71073 
_diffrn_radiation_type            MoK\a 
_diffrn_radiation_source          'normal-focus sealed tube' 
_diffrn_radiation_monochromator   graphite 
_diffrn_measurement_device_type   'BRUKER SMART 1000 CCD' 
_diffrn_measurement_method        '\w-scans' 
_diffrn_detector_area_resol_mean  ? 
_diffrn_standards_number          'None (area detector data)' 
_diffrn_standards_interval_count  ? 
_diffrn_standards_interval_time   ? 
_diffrn_standards_decay_%         ? 
_diffrn_reflns_number             11486 
_diffrn_reflns_av_R_equivalents   0.0209 
_diffrn_reflns_av_sigmaI/netI     0.0348 
_diffrn_reflns_limit_h_min        -13 
_diffrn_reflns_limit_h_max        12 
_diffrn_reflns_limit_k_min        -10 
_diffrn_reflns_limit_k_max        17 
_diffrn_reflns_limit_l_min        -17 
_diffrn_reflns_limit_l_max        17 
_diffrn_reflns_theta_min          1.65
_diffrn_reflns_theta_max          25.00 
_reflns_number_total              9370 
_reflns_number_gt                 7860 
_reflns_threshold_expression      >2sigma(I) 
 
_computing_data_collection        SMART 
_computing_cell_refinement        SAINT 
_computing_data_reduction         SAINT 
_computing_structure_solution     'SHELXS-97 (Sheldrick, 1990)' 
_computing_structure_refinement   'SHELXL-97 (Sheldrick, 1997)' 
_computing_molecular_graphics     XP 
_computing_publication_material   CIFTAB 
 
_refine_special_details 
; 
 Refinement of F^2^ against ALL reflections.  The weighted R-factor wR and 
 goodness of fit S are based on F^2^, conventional R-factors R are based 
 on F, with F set to zero for negative F^2^. The threshold expression of 
 F^2^ > 2sigma(F^2^) is used only for calculating R-factors(gt) etc. and is 
 not relevant to the choice of reflections for refinement.  R-factors based 
 on F^2^ are statistically about twice as large as those based on F, and R- 
 factors based on ALL data will be even larger. 
; 
 
_refine_ls_structure_factor_coef  Fsqd  
_refine_ls_matrix_type            full 
_refine_ls_weighting_scheme       calc  
_refine_ls_weighting_details 
 'calc w=1/[\s^2^(Fo^2^)+(0.0465P)^2^+4.2469P] where P=(Fo^2^+2Fc^2^)/3' 
_atom_sites_solution_primary      direct 
_atom_sites_solution_secondary    difmap 
_atom_sites_solution_hydrogens    geom 
_refine_ls_hydrogen_treatment     noref 
_refine_ls_extinction_method      none 
_refine_ls_extinction_coef        ? 
_refine_ls_number_reflns          9370 
_refine_ls_number_parameters      695 
_refine_ls_number_restraints      13 
_refine_ls_R_factor_all           0.0463 
_refine_ls_R_factor_gt            0.0373 
_refine_ls_wR_factor_ref          0.1043 
_refine_ls_wR_factor_gt           0.0968 
_refine_ls_goodness_of_fit_ref    1.039 
_refine_ls_restrained_S_all       1.042 
_refine_ls_shift/su_max           0.006 
_refine_ls_shift/su_mean          0.000 
 
loop_ 
 _atom_site_label 
 _atom_site_type_symbol 
 _atom_site_fract_x 
 _atom_site_fract_y 
 _atom_site_fract_z 
 _atom_site_U_iso_or_equiv 
 _atom_site_adp_type 
 _atom_site_occupancy 
 _atom_site_symmetry_multiplicity 
 _atom_site_calc_flag 
 _atom_site_refinement_flags 
 _atom_site_disorder_assembly 
 _atom_site_disorder_group 
Mo1 Mo 0.39323(2) 0.677685(19) 0.076257(19) 0.02190(9) Uani 1 1 d . . . 
Mo2 Mo 0.30157(2) 0.713673(19) -0.049274(19) 0.02197(9) Uani 1 1 d . . . 
N1 N 0.4880(2) 0.55730(19) 0.07539(18) 0.0223(5) Uani 1 1 d . . . 
N2 N 0.3949(2) 0.60190(19) -0.06744(18) 0.0217(5) Uani 1 1 d . . . 
N3 N 0.5075(2) 0.7811(2) -0.0052(2) 0.0265(6) Uani 1 1 d . . . 
N4 N 0.4012(2) 0.8251(2) -0.14216(19) 0.0270(6) Uani 1 1 d . . . 
N5 N 0.3005(2) 0.7887(2) 0.09521(19) 0.0265(6) Uani 1 1 d . . . 
N6 N 0.1955(2) 0.8239(2) -0.0394(2) 0.0273(6) Uani 1 1 d . . . 
N7 N 0.2827(2) 0.5761(2) 0.16844(19) 0.0265(6) Uani 1 1 d . . . 
N8 N 0.1834(2) 0.6167(2) 0.02952(19) 0.0260(6) Uani 1 1 d . . . 
O3 O 0.8292(3) 0.9137(3) 0.1327(3) 0.0675(9) Uani 1 1 d . . . 
O4 O 0.2887(3) 1.1240(2) -0.5197(2) 0.0704(10) Uani 1 1 d . . . 
O5 O 0.3431(2) 0.7893(3) 0.4437(2) 0.0580(8) Uani 1 1 d . . . 
O6 O -0.1882(2) 0.9749(2) -0.27157(19) 0.0457(7) Uani 1 1 d . . . 
O7 O 0.3215(2) 0.3323(2) 0.57047(18) 0.0461(7) Uani 1 1 d . . . 
O8 O -0.2148(2) 0.6640(2) -0.16185(19) 0.0440(7) Uani 1 1 d . . . 
C1 C 0.4704(2) 0.5403(2) 0.0022(2) 0.0215(6) Uani 1 1 d . . . 
C2 C 0.4826(3) 0.8393(2) -0.0991(2) 0.0298(7) Uani 1 1 d . . . 
H2A H 0.5235 0.8911 -0.1350 0.036 Uiso 1 1 calc R . . 
C3 C 0.2155(3) 0.8377(2) 0.0345(2) 0.0274(7) Uani 1 1 d . . . 
H3A H 0.1697 0.8818 0.0437 0.033 Uiso 1 1 calc R . . 
C4 C 0.1956(3) 0.5683(2) 0.1248(2) 0.0283(7) Uani 1 1 d . . . 
H4A H 0.1432 0.5287 0.1615 0.034 Uiso 1 1 calc R . . 
C11 C 0.5613(2) 0.4899(2) 0.1511(2) 0.0245(7) Uani 1 1 d . . . 
C12 C 0.5763(3) 0.4990(3) 0.2329(2) 0.0319(8) Uani 1 1 d . . . 
H12A H 0.5378 0.5501 0.2366 0.038 Uiso 1 1 calc R . . 
C13 C 0.6475(3) 0.4332(3) 0.3087(3) 0.0399(9) Uani 1 1 d . . . 
H13A H 0.6564 0.4401 0.3628 0.048 Uiso 1 1 calc R . . 
C21 C 0.3810(2) 0.5879(2) -0.1464(2) 0.0238(7) Uani 1 1 d . . . 
C22 C 0.3087(3) 0.6532(3) -0.2239(2) 0.0304(7) Uani 1 1 d . . . 
H22A H 0.2696 0.7046 -0.2212 0.036 Uiso 1 1 calc R . . 
C23 C 0.2945(3) 0.6427(3) -0.3037(3) 0.0365(8) Uani 1 1 d . . . 
H23A H 0.2461 0.6866 -0.3542 0.044 Uiso 1 1 calc R . . 
C31 C 0.5930(3) 0.8099(3) 0.0319(2) 0.0296(7) Uani 1 1 d . . . 
C32 C 0.6732(3) 0.7433(3) 0.0954(3) 0.0378(9) Uani 1 1 d . . . 
H32A H 0.6737 0.6775 0.1147 0.045 Uiso 1 1 calc R . . 
C33 C 0.7558(3) 0.7759(4) 0.1314(3) 0.0487(11) Uani 1 1 d . . . 
H33A H 0.8113 0.7321 0.1740 0.058 Uiso 1 1 calc R . . 
C34 C 0.7515(3) 0.8748(3) 0.1013(3) 0.0452(10) Uani 1 1 d . . . 
C35 C 0.6728(4) 0.9401(3) 0.0397(3) 0.0496(10) Uani 1 1 d . . . 
H35A H 0.6718 1.0057 0.0210 0.060 Uiso 1 1 calc R . . 
C36 C 0.5945(3) 0.9089(3) 0.0048(3) 0.0416(9) Uani 1 1 d . . . 
H36A H 0.5404 0.9543 -0.0381 0.050 Uiso 1 1 calc R . . 
C37 C 0.9027(4) 0.8512(5) 0.2070(4) 0.0762(16) Uani 1 1 d . . . 
H37A H 0.9499 0.8883 0.2204 0.114 Uiso 1 1 calc R . . 
H37B H 0.9449 0.8096 0.1887 0.114 Uiso 1 1 calc R . . 
H37C H 0.8644 0.8121 0.2637 0.114 Uiso 1 1 calc R . . 
C41 C 0.3760(3) 0.9005(2) -0.2406(2) 0.0288(7) Uani 1 1 d . . . 
C42 C 0.3878(3) 0.8830(3) -0.3165(3) 0.0424(9) Uani 1 1 d . . . 
H42A H 0.4148 0.8212 -0.3044 0.051 Uiso 1 1 calc R . . 
C43 C 0.3604(4) 0.9555(3) -0.4105(3) 0.0484(11) Uani 1 1 d . . . 
H43A H 0.3694 0.9423 -0.4609 0.058 Uiso 1 1 calc R . . 
C44 C 0.3198(4) 1.0472(3) -0.4297(3) 0.0452(10) Uani 1 1 d . . . 
C45 C 0.3085(4) 1.0661(3) -0.3540(3) 0.0540(12) Uani 1 1 d . . . 
H45A H 0.2822 1.1282 -0.3664 0.065 Uiso 1 1 calc R . . 
C46 C 0.3359(4) 0.9935(3) -0.2601(3) 0.0436(10) Uani 1 1 d . . . 
H46A H 0.3275 1.0068 -0.2098 0.052 Uiso 1 1 calc R . . 
C47 C 0.3000(5) 1.1088(4) -0.6001(3) 0.0786(17) Uani 1 1 d . . . 
H47A H 0.2762 1.1681 -0.6583 0.118 Uiso 1 1 calc R . . 
H47B H 0.2567 1.0583 -0.5923 0.118 Uiso 1 1 calc R . . 
H47C H 0.3749 1.0897 -0.6039 0.118 Uiso 1 1 calc R . . 
C51 C 0.3110(3) 0.7977(2) 0.1791(2) 0.0277(7) Uani 1 1 d . . . 
C52 C 0.4125(3) 0.8013(3) 0.2133(3) 0.0322(8) Uani 1 1 d . . . 
H52A H 0.4724 0.8057 0.1766 0.039 Uiso 1 1 calc R . . 
C53 C 0.4268(3) 0.7986(3) 0.3011(3) 0.0392(9) Uani 1 1 d . . . 
H53A H 0.4958 0.8006 0.3226 0.047 Uiso 1 1 calc R . . 
C54 C 0.3385(3) 0.7928(3) 0.3565(3) 0.0400(9) Uani 1 1 d . . . 
C55 C 0.2359(3) 0.7899(3) 0.3224(3) 0.0472(10) Uani 1 1 d . . . 
H55A H 0.1760 0.7859 0.3590 0.057 Uiso 1 1 calc R . . 
C56 C 0.2226(3) 0.7927(3) 0.2359(3) 0.0395(9) Uani 1 1 d . . . 
H56A H 0.1534 0.7913 0.2143 0.047 Uiso 1 1 calc R . . 
C57 C 0.4463(4) 0.7863(4) 0.4829(3) 0.0640(14) Uani 1 1 d . . . 
H57A H 0.4385 0.7835 0.5441 0.096 Uiso 1 1 calc R . . 
H57B H 0.4797 0.8438 0.4396 0.096 Uiso 1 1 calc R . . 
H57C H 0.4910 0.7296 0.4917 0.096 Uiso 1 1 calc R . . 
C61 C 0.0971(3) 0.8689(2) -0.0969(2) 0.0282(7) Uani 1 1 d . . . 
C62 C 0.0923(3) 0.8835(3) -0.1899(3) 0.0372(8) Uani 1 1 d . . . 
H62A H 0.1546 0.8692 -0.2150 0.045 Uiso 1 1 calc R . . 
C63 C -0.0035(3) 0.9191(3) -0.2462(3) 0.0411(9) Uani 1 1 d . . . 
H63A H -0.0051 0.9278 -0.3083 0.049 Uiso 1 1 calc R . . 
C64 C -0.0963(3) 0.9416(3) -0.2108(3) 0.0331(8) Uani 1 1 d . . . 
C65 C -0.0926(3) 0.9296(3) -0.1186(3) 0.0390(9) Uani 1 1 d . . . 
H65A H -0.1543 0.9466 -0.0947 0.047 Uiso 1 1 calc R . . 
C66 C 0.0031(3) 0.8926(3) -0.0625(3) 0.0380(9) Uani 1 1 d . . . 
H66A H 0.0045 0.8833 -0.0001 0.046 Uiso 1 1 calc R . . 
C67 C -0.2882(3) 0.9646(4) -0.2261(3) 0.0521(11) Uani 1 1 d . . . 
H67A H -0.3470 0.9895 -0.2741 0.078 Uiso 1 1 calc R . . 
H67B H -0.2918 1.0004 -0.1920 0.078 Uiso 1 1 calc R . . 
H67C H -0.2938 0.8969 -0.1814 0.078 Uiso 1 1 calc R . . 
C71 C 0.2951(3) 0.5134(2) 0.2711(2) 0.0285(7) Uani 1 1 d . . . 
C72 C 0.2717(3) 0.4165(3) 0.3160(3) 0.0347(8) Uani 1 1 d . . . 
H72A H 0.2501 0.3903 0.2785 0.042 Uiso 1 1 calc R . . 
C73 C 0.2803(3) 0.3590(3) 0.4155(3) 0.0394(9) Uani 1 1 d . . . 
H73A H 0.2626 0.2950 0.4446 0.047 Uiso 1 1 calc R . . 
C74 C 0.3150(3) 0.3957(3) 0.4721(2) 0.0351(8) Uani 1 1 d . . . 
C75 C 0.3420(3) 0.4907(3) 0.4288(3) 0.0377(9) Uani 1 1 d . . . 
H75A H 0.3666 0.5158 0.4662 0.045 Uiso 1 1 calc R . . 
C76 C 0.3318(3) 0.5481(3) 0.3286(2) 0.0347(8) Uani 1 1 d . . . 
H76A H 0.3505 0.6118 0.2996 0.042 Uiso 1 1 calc R . . 
C77 C 0.3444(4) 0.3715(3) 0.6301(3) 0.0553(12) Uani 1 1 d . . . 
H77A H 0.3479 0.3208 0.6966 0.083 Uiso 1 1 calc R . . 
H77B H 0.2880 0.4217 0.6202 0.083 Uiso 1 1 calc R . . 
H77C H 0.4127 0.3987 0.6143 0.083 Uiso 1 1 calc R . . 
C81 C 0.0794(3) 0.6233(2) -0.0138(2) 0.0264(7) Uani 1 1 d . . . 
C82 C 0.0734(3) 0.6116(3) -0.0939(3) 0.0322(8) Uani 1 1 d . . . 
H82A H 0.1364 0.5941 -0.1158 0.039 Uiso 1 1 calc R . . 
C83 C -0.0257(3) 0.6259(3) -0.1419(3) 0.0356(8) Uani 1 1 d . . . 
H83A H -0.0286 0.6193 -0.1966 0.043 Uiso 1 1 calc R . . 
C84 C -0.1202(3) 0.6500(3) -0.1087(2) 0.0305(7) Uani 1 1 d . . . 
C85 C -0.1156(3) 0.6601(3) -0.0280(3) 0.0364(8) Uani 1 1 d . . . 
H85A H -0.1791 0.6752 -0.0048 0.044 Uiso 1 1 calc R . . 
C86 C -0.0157(3) 0.6475(3) 0.0189(3) 0.0350(8) Uani 1 1 d . . . 
H86A H -0.0128 0.6554 0.0728 0.042 Uiso 1 1 calc R . . 
C87 C -0.3139(3) 0.6597(4) -0.1162(3) 0.0536(11) Uani 1 1 d . . . 
H87A H -0.3734 0.6715 -0.1605 0.080 Uiso 1 1 calc R . . 
H87B H -0.3204 0.7083 -0.0969 0.080 Uiso 1 1 calc R . . 
H87C H -0.3153 0.5963 -0.0603 0.080 Uiso 1 1 calc R . . 
Cl1 Cl 0.0036(6) 0.7443(4) 0.5375(6) 0.141(3) Uani 0.50 1 d PD A 1 
C1S C 0.0208(17) 0.8676(8) 0.4798(9) 0.120(7) Uani 0.50 1 d PD A 1 
H1SA H 0.0485 0.8876 0.4163 0.144 Uiso 0.50 1 calc PR A 1 
H1SB H -0.0486 0.9051 0.4714 0.144 Uiso 0.50 1 calc PR A 1 
Cl2 Cl 0.1110(4) 0.8899(3) 0.5477(3) 0.0705(9) Uani 0.50 1 d PD A 1 
Cl1B Cl -0.0240(6) 0.7765(7) 0.4774(6) 0.178(3) Uani 0.50 1 d PD B 2 
C1SB C -0.0271(14) 0.832(2) 0.549(2) 0.193(13) Uani 0.50 1 d PD B 2 
H1SC H -0.0847 0.8848 0.5251 0.231 Uiso 0.50 1 calc PR B 2 
H1SD H -0.0421 0.7844 0.6152 0.231 Uiso 0.50 1 calc PR B 2 
Cl2B Cl 0.0958(9) 0.8754(9) 0.5484(10) 0.246(6) Uani 0.50 1 d PD B 2 
Cl3 Cl -0.0615(2) 0.5138(2) 0.30020(18) 0.1442(9) Uani 1 1 d D . . 
C2S C 0.0385(6) 0.5444(8) 0.3526(7) 0.145(4) Uani 1 1 d D . . 
H2SA H 0.0742 0.4849 0.4059 0.175 Uiso 1 1 calc R . . 
H2SB H 0.0924 0.5750 0.3054 0.175 Uiso 1 1 calc R . . 
Cl4 Cl -0.0064(3) 0.62046(18) 0.3944(2) 0.1671(11) Uani 1 1 d D . . 
 
loop_ 
 _atom_site_aniso_label 
 _atom_site_aniso_U_11 
 _atom_site_aniso_U_22 
 _atom_site_aniso_U_33 
 _atom_site_aniso_U_23 
 _atom_site_aniso_U_13 
 _atom_site_aniso_U_12 
Mo1 0.02328(15) 0.01982(15) 0.02218(15) -0.01054(12) -0.00218(11) 0.00062(11) 
Mo2 0.02313(15) 0.01965(15) 0.02105(15) -0.00907(12) -0.00200(10) 0.00137(11) 
N1 0.0238(13) 0.0212(13) 0.0228(13) -0.0120(11) -0.0029(10) 0.0002(11) 
N2 0.0226(13) 0.0204(13) 0.0204(13) -0.0092(11) -0.0025(10) 0.0007(10) 
N3 0.0242(14) 0.0263(15) 0.0303(15) -0.0154(13) 0.0004(11) -0.0007(11) 
N4 0.0270(14) 0.0230(14) 0.0262(14) -0.0089(12) 0.0014(11) -0.0005(11) 
N5 0.0277(14) 0.0263(15) 0.0275(14) -0.0155(12) -0.0018(11) 0.0013(11) 
N6 0.0265(14) 0.0244(14) 0.0276(14) -0.0110(12) -0.0017(11) 0.0025(11) 
N7 0.0292(14) 0.0247(14) 0.0236(14) -0.0105(12) -0.0015(11) -0.0032(11) 
N8 0.0274(14) 0.0243(14) 0.0235(14) -0.0099(12) -0.0013(11) -0.0026(11) 
O3 0.059(2) 0.075(2) 0.079(2) -0.045(2) -0.0121(17) -0.0156(17) 
O4 0.133(3) 0.0332(16) 0.0304(15) -0.0060(13) -0.0161(18) 0.0013(18) 
O5 0.0581(18) 0.088(2) 0.0397(16) -0.0421(17) -0.0001(14) 0.0046(17) 
O6 0.0316(14) 0.0642(19) 0.0401(15) -0.0270(15) -0.0073(11) 0.0072(13) 
O7 0.0700(19) 0.0369(15) 0.0233(13) -0.0092(12) -0.0016(12) -0.0026(14) 
O8 0.0291(13) 0.0632(19) 0.0448(15) -0.0305(15) -0.0056(11) -0.0050(12) 
C1 0.0211(15) 0.0191(15) 0.0223(15) -0.0087(13) 0.0009(12) -0.0032(12) 
C2 0.0290(17) 0.0255(17) 0.0316(18) -0.0116(15) 0.0043(14) -0.0025(14) 
C3 0.0278(17) 0.0225(17) 0.0318(18) -0.0143(15) 0.0008(14) 0.0033(13) 
C4 0.0265(17) 0.0287(18) 0.0281(17) -0.0127(15) 0.0026(13) -0.0046(14) 
C11 0.0249(16) 0.0216(16) 0.0259(16) -0.0112(14) -0.0040(13) -0.0006(13) 
C12 0.0347(18) 0.0314(19) 0.0321(18) -0.0190(16) -0.0068(15) 0.0059(15) 
C13 0.047(2) 0.045(2) 0.0314(19) -0.0236(18) -0.0125(16) 0.0060(18) 
C21 0.0245(16) 0.0213(16) 0.0226(16) -0.0084(14) -0.0008(12) -0.0025(13) 
C22 0.0307(18) 0.0269(18) 0.0303(18) -0.0130(15) -0.0073(14) 0.0050(14) 
C23 0.039(2) 0.036(2) 0.0303(19) -0.0154(17) -0.0138(15) 0.0103(16) 
C31 0.0269(17) 0.036(2) 0.0318(18) -0.0208(16) 0.0087(14) -0.0087(15) 
C32 0.0326(19) 0.050(2) 0.034(2) -0.0223(18) 0.0058(15) -0.0085(17) 
C33 0.039(2) 0.070(3) 0.032(2) -0.022(2) -0.0035(17) 0.004(2) 
C34 0.047(2) 0.052(3) 0.052(2) -0.036(2) 0.0162(19) -0.023(2) 
C35 0.055(3) 0.045(2) 0.054(3) -0.028(2) 0.006(2) -0.014(2) 
C36 0.046(2) 0.041(2) 0.046(2) -0.0275(19) 0.0102(18) -0.0130(18) 
C37 0.047(3) 0.098(4) 0.078(4) -0.040(3) -0.017(3) -0.003(3) 
C41 0.0308(17) 0.0250(17) 0.0240(16) -0.0067(14) 0.0036(13) -0.0052(14) 
C42 0.060(3) 0.029(2) 0.037(2) -0.0157(17) 0.0066(18) 0.0006(18) 
C43 0.082(3) 0.036(2) 0.0280(19) -0.0164(18) 0.0045(19) -0.004(2) 
C44 0.070(3) 0.029(2) 0.0273(19) -0.0069(17) -0.0043(18) -0.0061(19) 
C45 0.090(3) 0.024(2) 0.038(2) -0.0102(18) -0.003(2) 0.007(2) 
C46 0.067(3) 0.032(2) 0.031(2) -0.0155(17) -0.0006(18) 0.0045(19) 
C47 0.131(5) 0.060(3) 0.028(2) -0.009(2) -0.010(3) -0.007(3) 
C51 0.0313(17) 0.0212(16) 0.0293(17) -0.0123(14) -0.0004(14) 0.0019(13) 
C52 0.0324(18) 0.0342(19) 0.0338(19) -0.0202(16) 0.0023(15) 0.0000(15) 
C53 0.037(2) 0.045(2) 0.041(2) -0.0265(19) -0.0038(16) 0.0018(17) 
C54 0.045(2) 0.048(2) 0.033(2) -0.0259(19) -0.0013(16) 0.0062(18) 
C55 0.043(2) 0.061(3) 0.042(2) -0.030(2) 0.0103(18) 0.000(2) 
C56 0.0295(19) 0.051(2) 0.040(2) -0.0250(19) 0.0005(16) 0.0010(17) 
C57 0.068(3) 0.095(4) 0.047(3) -0.049(3) -0.003(2) -0.004(3) 
C61 0.0274(17) 0.0226(17) 0.0309(18) -0.0111(15) -0.0017(14) 0.0014(13) 
C62 0.0311(19) 0.047(2) 0.036(2) -0.0240(18) 0.0001(15) 0.0047(16) 
C63 0.037(2) 0.055(3) 0.0322(19) -0.0241(19) -0.0031(16) 0.0042(18) 
C64 0.0297(18) 0.0327(19) 0.0336(19) -0.0149(16) -0.0035(14) 0.0027(15) 
C65 0.0267(18) 0.049(2) 0.038(2) -0.0208(19) 0.0030(15) 0.0075(16) 
C66 0.0340(19) 0.050(2) 0.0294(19) -0.0208(18) -0.0024(15) 0.0086(17) 
C67 0.032(2) 0.062(3) 0.057(3) -0.027(2) -0.0070(18) 0.0044(19) 
C71 0.0283(17) 0.0264(18) 0.0256(17) -0.0092(15) -0.0009(13) -0.0004(14) 
C72 0.044(2) 0.0302(19) 0.0306(19) -0.0158(16) -0.0041(15) -0.0048(16) 
C73 0.053(2) 0.0251(19) 0.033(2) -0.0082(16) -0.0029(17) -0.0073(17) 
C74 0.043(2) 0.0309(19) 0.0253(18) -0.0102(16) -0.0031(15) 0.0040(16) 
C75 0.051(2) 0.035(2) 0.0277(18) -0.0169(17) -0.0065(16) -0.0008(17) 
C76 0.047(2) 0.0254(18) 0.0282(18) -0.0101(15) -0.0004(15) -0.0061(16) 
C77 0.080(3) 0.055(3) 0.027(2) -0.019(2) -0.002(2) 0.003(2) 
C81 0.0264(16) 0.0230(17) 0.0242(16) -0.0073(14) -0.0008(13) -0.0042(13) 
C82 0.0285(17) 0.038(2) 0.0373(19) -0.0240(17) 0.0033(14) -0.0043(15) 
C83 0.0352(19) 0.047(2) 0.0336(19) -0.0255(18) 0.0004(15) -0.0107(17) 
C84 0.0274(17) 0.0301(19) 0.0330(18) -0.0146(16) -0.0026(14) -0.0051(14) 
C85 0.0266(18) 0.045(2) 0.039(2) -0.0232(18) 0.0006(15) 0.0004(16) 
C86 0.0330(19) 0.046(2) 0.0309(18) -0.0229(18) 0.0003(15) -0.0024(16) 
C87 0.029(2) 0.072(3) 0.064(3) -0.036(3) -0.0029(19) -0.007(2) 
Cl1 0.140(4) 0.076(3) 0.204(7) -0.068(4) -0.023(5) -0.010(3) 
C1S 0.22(2) 0.056(8) 0.071(9) -0.020(7) -0.028(11) -0.029(11) 
Cl2 0.074(2) 0.0605(19) 0.084(2) -0.0421(18) 0.0193(18) -0.0025(17) 
Cl1B 0.132(6) 0.242(10) 0.193(8) -0.130(7) 0.057(5) -0.055(6) 
C1SB 0.125(16) 0.19(3) 0.34(4) -0.19(3) 0.13(2) -0.057(15) 
Cl2B 0.200(10) 0.246(12) 0.315(13) -0.175(11) -0.069(9) 0.093(9) 
Cl3 0.1229(17) 0.166(2) 0.1325(19) -0.0681(18) 0.0145(15) 0.0040(16) 
C2S 0.085(5) 0.224(11) 0.141(7) -0.108(8) 0.002(5) 0.030(6) 
Cl4 0.213(3) 0.0941(16) 0.150(2) -0.0308(15) 0.026(2) 0.0067(17) 
 
_geom_special_details 
; 
 All esds (except the esd in the dihedral angle between two l.s. planes) 
 are estimated using the full covariance matrix.  The cell esds are taken 
 into account individually in the estimation of esds in distances, angles 
 and torsion angles; correlations between esds in cell parameters are only 
 used when they are defined by crystal symmetry.  An approximate (isotropic) 
 treatment of cell esds is used for estimating esds involving l.s. planes. 
; 
 
loop_ 
 _geom_bond_atom_site_label_1 
 _geom_bond_atom_site_label_2 
 _geom_bond_distance 
 _geom_bond_site_symmetry_2 
 _geom_bond_publ_flag 
Mo1 Mo2 2.0939(4) . y 
Mo1 N1 2.156(3) . y 
Mo1 N7 2.160(3) . y 
Mo1 N3 2.161(3) . y 
Mo1 N5 2.162(3) . y 
Mo2 N8 2.135(3) . y 
Mo2 N4 2.150(3) . y 
Mo2 N6 2.161(3) . y 
Mo2 N2 2.169(3) . y 
N1 C1 1.343(4) . ? 
N1 C11 1.407(4) . ? 
N2 C1 1.353(4) . ? 
N2 C21 1.397(4) . ? 
N3 C2 1.332(4) . ? 
N3 C31 1.426(4) . ? 
N4 C2 1.317(4) . ? 
N4 C41 1.438(4) . ? 
N5 C3 1.328(4) . ? 
N5 C51 1.421(4) . ? 
N6 C3 1.328(4) . ? 
N6 C61 1.426(4) . ? 
N7 C4 1.331(4) . ? 
N7 C71 1.434(4) . ? 
N8 C4 1.322(4) . ? 
N8 C81 1.433(4) . ? 
O3 C37 1.376(6) . ? 
O3 C34 1.403(5) . ? 
O4 C44 1.372(5) . ? 
O4 C47 1.422(6) . ? 
O5 C54 1.365(4) . ? 
O5 C57 1.410(5) . ? 
O6 C64 1.379(4) . ? 
O6 C67 1.414(5) . ? 
O7 C74 1.379(4) . ? 
O7 C77 1.411(5) . ? 
O8 C84 1.383(4) . ? 
O8 C87 1.414(5) . ? 
C1 C1 1.450(6) 2_665 ? 
C11 C12 1.395(5) . ? 
C11 C21 1.405(5) 2_665 ? 
C12 C13 1.386(5) . ? 
C13 C23 1.383(5) 2_665 ? 
C21 C22 1.405(4) . ? 
C21 C11 1.405(5) 2_665 ? 
C22 C23 1.376(5) . ? 
C23 C13 1.383(5) 2_665 ? 
C31 C32 1.373(5) . ? 
C31 C36 1.409(5) . ? 
C32 C33 1.426(6) . ? 
C33 C34 1.391(6) . ? 
C34 C35 1.343(6) . ? 
C35 C36 1.360(6) . ? 
C41 C42 1.375(5) . ? 
C41 C46 1.390(5) . ? 
C42 C43 1.383(5) . ? 
C43 C44 1.375(6) . ? 
C44 C45 1.385(6) . ? 
C45 C46 1.381(5) . ? 
C51 C52 1.387(5) . ? 
C51 C56 1.401(5) . ? 
C52 C53 1.391(5) . ? 
C53 C54 1.384(5) . ? 
C54 C55 1.395(6) . ? 
C55 C56 1.368(5) . ? 
C61 C62 1.384(5) . ? 
C61 C66 1.384(5) . ? 
C62 C63 1.383(5) . ? 
C63 C64 1.374(5) . ? 
C64 C65 1.386(5) . ? 
C65 C66 1.382(5) . ? 
C71 C76 1.376(5) . ? 
C71 C72 1.397(5) . ? 
C72 C73 1.384(5) . ? 
C73 C74 1.380(5) . ? 
C74 C75 1.385(5) . ? 
C75 C76 1.393(5) . ? 
C81 C82 1.381(5) . ? 
C81 C86 1.385(5) . ? 
C82 C83 1.387(5) . ? 
C83 C84 1.382(5) . ? 
C84 C85 1.375(5) . ? 
C85 C86 1.393(5) . ? 
Cl1 C1S 1.734(10) . ? 
C1S Cl2 1.732(11) . ? 
Cl1B C1SB 1.753(12) . ? 
C1SB Cl2B 1.724(11) . ? 
Cl3 C2S 1.725(8) . ? 
C2S Cl4 1.699(8) . ? 
 
loop_ 
 _geom_angle_atom_site_label_1 
 _geom_angle_atom_site_label_2 
 _geom_angle_atom_site_label_3 
 _geom_angle 
 _geom_angle_site_symmetry_1 
 _geom_angle_site_symmetry_3 
 _geom_angle_publ_flag 
Mo2 Mo1 N1 93.26(7) . . ? 
Mo2 Mo1 N7 92.58(7) . . ? 
N1 Mo1 N7 88.26(10) . . ? 
Mo2 Mo1 N3 92.00(7) . . ? 
N1 Mo1 N3 93.84(10) . . ? 
N7 Mo1 N3 174.85(10) . . ? 
Mo2 Mo1 N5 92.41(7) . . ? 
N1 Mo1 N5 173.35(10) . . ? 
N7 Mo1 N5 88.01(10) . . ? 
N3 Mo1 N5 89.44(10) . . ? 
Mo1 Mo2 N8 92.93(7) . . ? 
Mo1 Mo2 N4 93.67(7) . . ? 
N8 Mo2 N4 171.75(10) . . ? 
Mo1 Mo2 N6 93.12(7) . . ? 
N8 Mo2 N6 85.74(10) . . ? 
N4 Mo2 N6 88.97(10) . . ? 
Mo1 Mo2 N2 92.11(7) . . ? 
N8 Mo2 N2 91.59(10) . . ? 
N4 Mo2 N2 93.10(10) . . ? 
N6 Mo2 N2 174.24(10) . . ? 
C1 N1 C11 117.3(3) . . ? 
C1 N1 Mo1 118.6(2) . . ? 
C11 N1 Mo1 123.9(2) . . ? 
C1 N2 C21 117.2(3) . . ? 
C1 N2 Mo2 118.7(2) . . ? 
C21 N2 Mo2 124.1(2) . . ? 
C2 N3 C31 114.5(3) . . ? 
C2 N3 Mo1 116.4(2) . . ? 
C31 N3 Mo1 127.5(2) . . ? 
C2 N4 C41 114.7(3) . . ? 
C2 N4 Mo2 116.0(2) . . ? 
C41 N4 Mo2 127.5(2) . . ? 
C3 N5 C51 117.9(3) . . ? 
C3 N5 Mo1 117.2(2) . . ? 
C51 N5 Mo1 123.5(2) . . ? 
C3 N6 C61 119.1(3) . . ? 
C3 N6 Mo2 116.7(2) . . ? 
C61 N6 Mo2 123.3(2) . . ? 
C4 N7 C71 116.5(3) . . ? 
C4 N7 Mo1 116.5(2) . . ? 
C71 N7 Mo1 127.0(2) . . ? 
C4 N8 C81 118.3(3) . . ? 
C4 N8 Mo2 117.6(2) . . ? 
C81 N8 Mo2 121.6(2) . . ? 
C37 O3 C34 119.1(4) . . ? 
C44 O4 C47 118.0(4) . . ? 
C54 O5 C57 117.6(3) . . ? 
C64 O6 C67 115.7(3) . . ? 
C74 O7 C77 116.9(3) . . ? 
C84 O8 C87 117.3(3) . . ? 
N1 C1 N2 117.1(3) . . ? 
N1 C1 C1 121.7(3) . 2_665 ? 
N2 C1 C1 121.2(3) . 2_665 ? 
N4 C2 N3 121.3(3) . . ? 
N6 C3 N5 120.4(3) . . ? 
N8 C4 N7 120.2(3) . . ? 
C12 C11 C21 119.2(3) . 2_665 ? 
C12 C11 N1 120.0(3) . . ? 
C21 C11 N1 120.8(3) 2_665 . ? 
C13 C12 C11 121.1(3) . . ? 
C23 C13 C12 119.8(3) 2_665 . ? 
N2 C21 C22 119.8(3) . . ? 
N2 C21 C11 121.6(3) . 2_665 ? 
C22 C21 C11 118.7(3) . 2_665 ? 
C23 C22 C21 121.3(3) . . ? 
C22 C23 C13 119.9(3) . 2_665 ? 
C32 C31 C36 118.7(3) . . ? 
C32 C31 N3 121.7(3) . . ? 
C36 C31 N3 119.6(3) . . ? 
C31 C32 C33 119.4(4) . . ? 
C34 C33 C32 118.4(4) . . ? 
C35 C34 C33 122.3(4) . . ? 
C35 C34 O3 115.2(4) . . ? 
C33 C34 O3 122.5(4) . . ? 
C34 C35 C36 119.2(4) . . ? 
C35 C36 C31 122.0(4) . . ? 
C42 C41 C46 118.5(3) . . ? 
C42 C41 N4 121.9(3) . . ? 
C46 C41 N4 119.6(3) . . ? 
C41 C42 C43 121.3(4) . . ? 
C44 C43 C42 120.1(4) . . ? 
O4 C44 C43 125.1(4) . . ? 
O4 C44 C45 115.7(4) . . ? 
C43 C44 C45 119.2(4) . . ? 
C46 C45 C44 120.5(4) . . ? 
C45 C46 C41 120.4(4) . . ? 
C52 C51 C56 117.3(3) . . ? 
C52 C51 N5 120.4(3) . . ? 
C56 C51 N5 121.9(3) . . ? 
C51 C52 C53 121.7(3) . . ? 
C54 C53 C52 120.1(3) . . ? 
O5 C54 C53 125.1(4) . . ? 
O5 C54 C55 116.2(3) . . ? 
C53 C54 C55 118.8(3) . . ? 
C56 C55 C54 120.8(4) . . ? 
C55 C56 C51 121.4(4) . . ? 
C62 C61 C66 117.8(3) . . ? 
C62 C61 N6 118.6(3) . . ? 
C66 C61 N6 123.5(3) . . ? 
C63 C62 C61 121.2(3) . . ? 
C64 C63 C62 120.4(3) . . ? 
C63 C64 O6 116.2(3) . . ? 
C63 C64 C65 119.3(3) . . ? 
O6 C64 C65 124.6(3) . . ? 
C66 C65 C64 119.8(3) . . ? 
C65 C66 C61 121.5(3) . . ? 
C76 C71 C72 118.0(3) . . ? 
C76 C71 N7 120.0(3) . . ? 
C72 C71 N7 122.0(3) . . ? 
C73 C72 C71 120.6(3) . . ? 
C74 C73 C72 120.5(3) . . ? 
O7 C74 C73 116.0(3) . . ? 
O7 C74 C75 124.2(3) . . ? 
C73 C74 C75 119.7(3) . . ? 
C74 C75 C76 119.1(3) . . ? 
C71 C76 C75 121.9(3) . . ? 
C82 C81 C86 118.7(3) . . ? 
C82 C81 N8 119.7(3) . . ? 
C86 C81 N8 121.4(3) . . ? 
C81 C82 C83 120.6(3) . . ? 
C84 C83 C82 120.2(3) . . ? 
C85 C84 C83 119.7(3) . . ? 
C85 C84 O8 124.2(3) . . ? 
C83 C84 O8 116.1(3) . . ? 
C84 C85 C86 119.9(3) . . ? 
C81 C86 C85 120.8(3) . . ? 
Cl2 C1S Cl1 109.8(7) . . ? 
Cl2B C1SB Cl1B 110.1(9) . . ? 
Cl4 C2S Cl3 114.7(4) . . ? 
 
_diffrn_measured_fraction_theta_max    0.986 
_diffrn_reflns_theta_full              25.00 
_diffrn_measured_fraction_theta_full   0.986 
_refine_diff_density_max    1.162 
_refine_diff_density_min   -0.721 
_refine_diff_density_rms    0.080 

============the end of compound 1==============

============compound 2b========================
 
data_xl 
 
_audit_creation_method            SHELXL-97 
_chemical_name_systematic 
; 
 ? 
; 
_chemical_name_common             ? 
_chemical_melting_point           ? 
_chemical_formula_moiety          ? 
_chemical_formula_sum 
 'C112.30 H112.60 Cl14.60 F3 Mo4 N16 O15 S' 
_chemical_formula_weight          2916.77 
 
loop_ 
 _atom_type_symbol 
 _atom_type_description 
 _atom_type_scat_dispersion_real 
 _atom_type_scat_dispersion_imag 
 _atom_type_scat_source 
 'C'  'C'   0.0033   0.0016 
 'International Tables Vol C Tables 4.2.6.8 and 6.1.1.4' 
 'H'  'H'   0.0000   0.0000 
 'International Tables Vol C Tables 4.2.6.8 and 6.1.1.4' 
 'N'  'N'   0.0061   0.0033 
 'International Tables Vol C Tables 4.2.6.8 and 6.1.1.4' 
 'O'  'O'   0.0106   0.0060 
 'International Tables Vol C Tables 4.2.6.8 and 6.1.1.4' 
 'F'  'F'   0.0171   0.0103 
 'International Tables Vol C Tables 4.2.6.8 and 6.1.1.4' 
 'S'  'S'   0.1246   0.1234 
 'International Tables Vol C Tables 4.2.6.8 and 6.1.1.4' 
 'Mo'  'Mo'  -1.6832   0.6857 
 'International Tables Vol C Tables 4.2.6.8 and 6.1.1.4' 
 'Cl'  'Cl'   0.1484   0.1585 
 'International Tables Vol C Tables 4.2.6.8 and 6.1.1.4' 
 
_symmetry_cell_setting            ? 
_symmetry_space_group_name_H-M    ? 
 
loop_ 
 _symmetry_equiv_pos_as_xyz 
 'x, y, z' 
 '-x+1/2, y+1/2, -z+1/2' 
 '-x, -y, -z' 
 'x-1/2, -y-1/2, z-1/2' 
 
_cell_length_a                    17.881(5) 
_cell_length_b                    23.811(6) 
_cell_length_c                    29.914(8) 
_cell_angle_alpha                 90.00 
_cell_angle_beta                  93.715(5) 
_cell_angle_gamma                 90.00 
_cell_volume                      12710(6) 
_cell_formula_units_Z             4 
_cell_measurement_temperature     213(2) 
_cell_measurement_reflns_used     ? 
_cell_measurement_theta_min       ? 
_cell_measurement_theta_max       ? 
 
_exptl_crystal_description        ? 
_exptl_crystal_colour             ? 
_exptl_crystal_size_max           0.44 
_exptl_crystal_size_mid           0.31 
_exptl_crystal_size_min           0.29 
_exptl_crystal_density_meas       ? 
_exptl_crystal_density_diffrn     1.524 
_exptl_crystal_density_method     'not measured' 
_exptl_crystal_F_000              5910 
_exptl_absorpt_coefficient_mu     0.779 
_exptl_absorpt_correction_type    ? 
_exptl_absorpt_correction_T_min   0.7256 
_exptl_absorpt_correction_T_max   0.8056 
_exptl_absorpt_process_details    ? 
 
_exptl_special_details 
; 
 ? 
; 
 
_diffrn_ambient_temperature       213(2) 
_diffrn_radiation_wavelength      0.71073 
_diffrn_radiation_type            MoK\a 
_diffrn_radiation_source          'fine-focus sealed tube' 
_diffrn_radiation_monochromator   graphite 
_diffrn_measurement_device_type   ? 
_diffrn_measurement_method        ? 
_diffrn_detector_area_resol_mean  ? 
_diffrn_standards_number          ? 
_diffrn_standards_interval_count  ? 
_diffrn_standards_interval_time   ? 
_diffrn_standards_decay_%         ? 
_diffrn_reflns_number             53200 
_diffrn_reflns_av_R_equivalents   0.0566 
_diffrn_reflns_av_sigmaI/netI     0.0581 
_diffrn_reflns_limit_h_min        -16 
_diffrn_reflns_limit_h_max        19 
_diffrn_reflns_limit_k_min        -25 
_diffrn_reflns_limit_k_max        18 
_diffrn_reflns_limit_l_min        -32 
_diffrn_reflns_limit_l_max        29 
_diffrn_reflns_theta_min          1.55 
_diffrn_reflns_theta_max          22.50 
_reflns_number_total              16564 
_reflns_number_gt                 11059 
_reflns_threshold_expression      >2sigma(I) 
 
_computing_data_collection        ? 
_computing_cell_refinement        ? 
_computing_data_reduction         ? 
_computing_structure_solution     'SHELXS-97 (Sheldrick, 1990)' 
_computing_structure_refinement   'SHELXL-97 (Sheldrick, 1997)' 
_computing_molecular_graphics     ? 
_computing_publication_material   ? 
 
_refine_special_details 
; 
 Refinement of F^2^ against ALL reflections.  The weighted R-factor wR and 
 goodness of fit S are based on F^2^, conventional R-factors R are based 
 on F, with F set to zero for negative F^2^. The threshold expression of 
 F^2^ > 2sigma(F^2^) is used only for calculating R-factors(gt) etc. and is 
 not relevant to the choice of reflections for refinement.  R-factors based 
 on F^2^ are statistically about twice as large as those based on F, and R- 
 factors based on ALL data will be even larger. 
; 
 
_refine_ls_structure_factor_coef  Fsqd  
_refine_ls_matrix_type            full 
_refine_ls_weighting_scheme       calc  
_refine_ls_weighting_details 
 'calc w=1/[\s^2^(Fo^2^)+(0.0833P)^2^+35.6455P] where P=(Fo^2^+2Fc^2^)/3' 
_atom_sites_solution_primary      direct 
_atom_sites_solution_secondary    difmap 
_atom_sites_solution_hydrogens    geom 
_refine_ls_hydrogen_treatment     mixed 
_refine_ls_extinction_method      none 
_refine_ls_extinction_coef        ? 
_refine_ls_number_reflns          16564 
_refine_ls_number_parameters      1606 
_refine_ls_number_restraints      260 
_refine_ls_R_factor_all           0.0954 
_refine_ls_R_factor_gt            0.0590 
_refine_ls_wR_factor_ref          0.1850 
_refine_ls_wR_factor_gt           0.1462 
_refine_ls_goodness_of_fit_ref    1.072 
_refine_ls_restrained_S_all       1.094 
_refine_ls_shift/su_max           0.019 
_refine_ls_shift/su_mean          0.000 
 
loop_ 
 _atom_site_label 
 _atom_site_type_symbol 
 _atom_site_fract_x 
 _atom_site_fract_y 
 _atom_site_fract_z 
 _atom_site_U_iso_or_equiv 
 _atom_site_adp_type 
 _atom_site_occupancy 
 _atom_site_symmetry_multiplicity 
 _atom_site_calc_flag 
 _atom_site_refinement_flags 
 _atom_site_disorder_assembly 
 _atom_site_disorder_group 
Mo1 Mo 0.40830(3) 0.60306(2) 0.166384(18) 0.02912(17) Uani 1 1 d . . . 
Mo2 Mo 0.35044(3) 0.60071(2) 0.102713(18) 0.02926(17) Uani 1 1 d . A . 
Mo3 Mo 0.42109(3) 0.90101(2) 0.152351(18) 0.03123(18) Uani 1 1 d . . . 
Mo4 Mo 0.35977(3) 0.89787(2) 0.089694(18) 0.03071(18) Uani 1 1 d . B . 
N1 N 0.4121(3) 0.6926(2) 0.16586(16) 0.0287(12) Uani 1 1 d . . . 
N2 N 0.3551(3) 0.6895(2) 0.09451(16) 0.0289(12) Uani 1 1 d . . . 
N3 N 0.3075(3) 0.6088(2) 0.20051(17) 0.0351(13) Uani 1 1 d . . . 
N4 N 0.2436(3) 0.60492(19) 0.13114(17) 0.0300(12) Uani 1 1 d . . . 
N5 N 0.4051(3) 0.5131(2) 0.17288(17) 0.0331(13) Uani 1 1 d . . . 
N6 N 0.3433(3) 0.5112(2) 0.10297(17) 0.0331(13) Uani 1 1 d . . . 
N7 N 0.5154(3) 0.5972(2) 0.13793(18) 0.0341(13) Uani 1 1 d . . . 
N8 N 0.4515(3) 0.5948(2) 0.06910(17) 0.0343(13) Uani 1 1 d . . . 
N9 N 0.4200(3) 0.8122(2) 0.16035(16) 0.0302(12) Uani 1 1 d . . . 
N10 N 0.3602(3) 0.8088(2) 0.08955(16) 0.0298(12) Uani 1 1 d . . . 
N11 N 0.3222(3) 0.9027(2) 0.18942(18) 0.0363(13) Uani 1 1 d . . . 
N12 N 0.2553(3) 0.9007(2) 0.12081(18) 0.0336(13) Uani 1 1 d . . . 
N13 N 0.4196(3) 0.9907(2) 0.15232(17) 0.0359(13) Uani 1 1 d . . . 
N14 N 0.3548(3) 0.9880(2) 0.08356(17) 0.0342(13) Uani 1 1 d . . . 
N15 N 0.5254(3) 0.9002(2) 0.12142(18) 0.0355(13) Uani 1 1 d . . . 
N16 N 0.4586(3) 0.8976(2) 0.05339(18) 0.0354(13) Uani 1 1 d . . . 
O3 O 0.2811(3) 0.6552(2) 0.38175(16) 0.0579(14) Uani 1 1 d . . . 
O4 O -0.0285(3) 0.5520(2) 0.03928(17) 0.0630(15) Uani 1 1 d . . . 
O5 O 0.5001(3) 0.3898(2) 0.32531(18) 0.0640(15) Uani 1 1 d . . . 
O6 O 0.2688(3) 0.3965(2) -0.05610(17) 0.0667(16) Uani 1 1 d . . . 
O7 O 0.7811(3) 0.5623(2) 0.24260(18) 0.0656(16) Uani 1 1 d . . . 
O11 O 0.3025(3) 0.8610(2) 0.37144(16) 0.0622(15) Uani 1 1 d . . . 
O12 O -0.0212(3) 0.9499(3) 0.03441(18) 0.0697(16) Uani 1 1 d . . . 
O13 O 0.5082(3) 1.1184(2) 0.30301(17) 0.0610(15) Uani 1 1 d . . . 
O14 O 0.2133(3) 1.0979(2) -0.06422(16) 0.0550(14) Uani 1 1 d . . . 
O15 O 0.7945(3) 0.9396(2) 0.22028(19) 0.0693(16) Uani 1 1 d . . . 
C1 C 0.3857(3) 0.7208(3) 0.12914(19) 0.0274(14) Uani 1 1 d . . . 
C2 C 0.4383(3) 0.7260(3) 0.2033(2) 0.0300(15) Uani 1 1 d . . . 
C3 C 0.4604(4) 0.6993(3) 0.2434(2) 0.0361(16) Uani 1 1 d . . . 
H3A H 0.4575 0.6600 0.2456 0.043 Uiso 1 1 calc R . . 
C4 C 0.4865(4) 0.7306(3) 0.2800(2) 0.0404(17) Uani 1 1 d . . . 
H4A H 0.5004 0.7125 0.3072 0.048 Uiso 1 1 calc R . . 
C5 C 0.4923(4) 0.7876(3) 0.2768(2) 0.0429(18) Uani 1 1 d . . . 
H5A H 0.5112 0.8085 0.3017 0.051 Uiso 1 1 calc R . . 
C6 C 0.4704(4) 0.8146(3) 0.2373(2) 0.0362(16) Uani 1 1 d . . . 
H6A H 0.4738 0.8540 0.2355 0.043 Uiso 1 1 calc R . . 
C7 C 0.4433(3) 0.7838(2) 0.1999(2) 0.0278(14) Uani 1 1 d . . . 
C8 C 0.3882(3) 0.7806(3) 0.12640(19) 0.0296(15) Uani 1 1 d . . . 
C9 C 0.3313(3) 0.7760(2) 0.0531(2) 0.0289(14) Uani 1 1 d . . . 
C10 C 0.3043(4) 0.8028(3) 0.0141(2) 0.0398(17) Uani 1 1 d . . . 
H10A H 0.3065 0.8421 0.0121 0.048 Uiso 1 1 calc R . . 
C11 C 0.2741(4) 0.7717(3) -0.0218(2) 0.0446(18) Uani 1 1 d . . . 
H11A H 0.2544 0.7901 -0.0478 0.054 Uiso 1 1 calc R . . 
C12 C 0.2729(4) 0.7141(3) -0.0195(2) 0.0445(18) Uani 1 1 d . . . 
H12A H 0.2534 0.6931 -0.0442 0.053 Uiso 1 1 calc R . . 
C13 C 0.3005(4) 0.6870(3) 0.0191(2) 0.0346(16) Uani 1 1 d . . . 
H13A H 0.2999 0.6475 0.0205 0.042 Uiso 1 1 calc R . . 
C14 C 0.3290(3) 0.7179(3) 0.0558(2) 0.0281(14) Uani 1 1 d . . . 
C30 C 0.2440(3) 0.6080(2) 0.1749(2) 0.0322(15) Uani 1 1 d . . . 
H30A H 0.1982 0.6097 0.1886 0.039 Uiso 1 1 calc R . . 
C31 C 0.3018(4) 0.6199(3) 0.2470(2) 0.0343(16) Uani 1 1 d . . . 
C32 C 0.3395(4) 0.5873(3) 0.2795(2) 0.0447(18) Uani 1 1 d . . . 
H32A H 0.3687 0.5570 0.2707 0.054 Uiso 1 1 calc R . . 
C33 C 0.3350(4) 0.5987(3) 0.3250(2) 0.0448(18) Uani 1 1 d . . . 
H33A H 0.3619 0.5766 0.3465 0.054 Uiso 1 1 calc R . . 
C34 C 0.2912(4) 0.6421(3) 0.3380(2) 0.0424(18) Uani 1 1 d . . . 
C35 C 0.2538(4) 0.6752(3) 0.3065(2) 0.0463(19) Uani 1 1 d . . . 
H35A H 0.2236 0.7049 0.3155 0.056 Uiso 1 1 calc R . . 
C36 C 0.2603(4) 0.6649(3) 0.2612(2) 0.0432(18) Uani 1 1 d . . . 
H36A H 0.2362 0.6889 0.2398 0.052 Uiso 1 1 calc R . . 
C37 C 0.3164(5) 0.6208(4) 0.4151(3) 0.071(3) Uani 1 1 d . . . 
H37A H 0.3051 0.6346 0.4444 0.107 Uiso 1 1 calc R . . 
H37B H 0.3702 0.6216 0.4124 0.107 Uiso 1 1 calc R . . 
H37C H 0.2984 0.5826 0.4113 0.107 Uiso 1 1 calc R . . 
C41 C 0.1726(3) 0.5939(3) 0.1080(2) 0.0318(15) Uani 1 1 d . . . 
C42 C 0.1241(4) 0.5543(3) 0.1243(2) 0.0418(17) Uani 1 1 d . . . 
H42A H 0.1370 0.5361 0.1516 0.050 Uiso 1 1 calc R . . 
C43 C 0.0573(4) 0.5413(3) 0.1008(2) 0.0479(19) Uani 1 1 d . . . 
H43A H 0.0248 0.5146 0.1121 0.058 Uiso 1 1 calc R . . 
C44 C 0.0385(4) 0.5680(3) 0.0605(2) 0.0471(19) Uani 1 1 d . . . 
C45 C 0.0860(4) 0.6074(3) 0.0442(2) 0.0438(18) Uani 1 1 d . . . 
H45A H 0.0733 0.6255 0.0168 0.053 Uiso 1 1 calc R . . 
C46 C 0.1523(4) 0.6203(3) 0.0681(2) 0.0395(17) Uani 1 1 d . . . 
H46A H 0.1842 0.6476 0.0570 0.047 Uiso 1 1 calc R . . 
C47 C -0.0447(5) 0.5721(4) -0.0049(3) 0.074(3) Uani 1 1 d . . . 
H47A H -0.0933 0.5581 -0.0162 0.111 Uiso 1 1 calc R . . 
H47B H -0.0066 0.5590 -0.0241 0.111 Uiso 1 1 calc R . . 
H47C H -0.0454 0.6128 -0.0047 0.111 Uiso 1 1 calc R . . 
C50 C 0.3726(3) 0.4848(3) 0.1386(2) 0.0344(16) Uani 1 1 d . . . 
H50A H 0.3705 0.4454 0.1399 0.041 Uiso 1 1 calc R . . 
C51 C 0.4285(4) 0.4820(3) 0.2118(2) 0.0353(16) Uani 1 1 d . . . 
C52 C 0.4935(4) 0.4981(3) 0.2367(2) 0.0408(17) Uani 1 1 d . . . 
H52A H 0.5205 0.5294 0.2275 0.049 Uiso 1 1 calc R . . 
C53 C 0.5190(4) 0.4689(3) 0.2746(2) 0.0477(19) Uani 1 1 d . . . 
H53A H 0.5631 0.4802 0.2910 0.057 Uiso 1 1 calc R . . 
C54 C 0.4793(4) 0.4227(3) 0.2883(2) 0.0481(19) Uani 1 1 d . . . 
C55 C 0.4150(4) 0.4071(3) 0.2649(2) 0.0461(18) Uani 1 1 d . . . 
H55A H 0.3879 0.3759 0.2744 0.055 Uiso 1 1 calc R . . 
C56 C 0.3890(4) 0.4367(3) 0.2272(2) 0.0414(17) Uani 1 1 d . . . 
H56A H 0.3438 0.4259 0.2119 0.050 Uiso 1 1 calc R . . 
C57 C 0.5661(5) 0.4056(4) 0.3515(3) 0.082(3) Uani 1 1 d . . . 
H57A H 0.5748 0.3793 0.3761 0.123 Uiso 1 1 calc R . . 
H57B H 0.5599 0.4431 0.3634 0.123 Uiso 1 1 calc R . . 
H57C H 0.6086 0.4051 0.3330 0.123 Uiso 1 1 calc R . . 
C61 C 0.3207(4) 0.4794(3) 0.0638(2) 0.0337(16) Uani 1 1 d . . . 
C62 C 0.2638(4) 0.5004(3) 0.0346(2) 0.0417(17) Uani 1 1 d . . . 
H62A H 0.2377 0.5329 0.0423 0.050 Uiso 1 1 calc R . . 
C63 C 0.2452(4) 0.4737(3) -0.0056(2) 0.0452(18) Uani 1 1 d . . . 
H63A H 0.2075 0.4887 -0.0255 0.054 Uiso 1 1 calc R . . 
C64 C 0.2816(4) 0.4253(3) -0.0167(2) 0.0485(19) Uani 1 1 d . . . 
C65 C 0.3375(4) 0.4039(3) 0.0126(2) 0.0478(19) Uani 1 1 d . . . 
H65A H 0.3622 0.3706 0.0054 0.057 Uiso 1 1 calc R . . 
C66 C 0.3568(4) 0.4310(3) 0.0518(2) 0.0424(17) Uani 1 1 d . . . 
H66A H 0.3955 0.4163 0.0711 0.051 Uiso 1 1 calc R . . 
C67 C 0.2099(5) 0.4151(4) -0.0855(3) 0.082(3) Uani 1 1 d . . . 
H67A H 0.2067 0.3915 -0.1120 0.122 Uiso 1 1 calc R . . 
H67B H 0.2191 0.4536 -0.0941 0.122 Uiso 1 1 calc R . . 
H67C H 0.1632 0.4130 -0.0709 0.122 Uiso 1 1 calc R . . 
C70 C 0.5152(4) 0.5952(2) 0.0935(2) 0.0322(15) Uani 1 1 d . A . 
H70A H 0.5608 0.5941 0.0796 0.039 Uiso 1 1 calc R . . 
C71 C 0.5849(4) 0.5902(3) 0.1632(2) 0.0345(16) Uani 1 1 d . . . 
C72 C 0.6353(4) 0.5481(3) 0.1537(3) 0.052(2) Uani 1 1 d . . . 
H72A H 0.6257 0.5249 0.1285 0.062 Uiso 1 1 calc R . . 
C73 C 0.6994(5) 0.5405(3) 0.1813(3) 0.061(2) Uani 1 1 d . . . 
H73A H 0.7325 0.5114 0.1749 0.074 Uiso 1 1 calc R . . 
C74 C 0.7164(4) 0.5744(3) 0.2181(3) 0.0489(19) Uani 1 1 d . . . 
C75 C 0.6669(4) 0.6157(3) 0.2273(3) 0.052(2) Uani 1 1 d . . . 
H75A H 0.6766 0.6389 0.2524 0.063 Uiso 1 1 calc R . . 
C76 C 0.6026(4) 0.6235(3) 0.1998(2) 0.0447(18) Uani 1 1 d . . . 
H76A H 0.5698 0.6527 0.2064 0.054 Uiso 1 1 calc R . . 
C77 C 0.7952(5) 0.5929(4) 0.2831(3) 0.083(3) Uani 1 1 d . . . 
H77A H 0.8425 0.5808 0.2977 0.124 Uiso 1 1 calc R . . 
H77B H 0.7552 0.5860 0.3028 0.124 Uiso 1 1 calc R . . 
H77C H 0.7976 0.6327 0.2765 0.124 Uiso 1 1 calc R . . 
C81 C 0.4558(8) 0.6044(5) 0.0223(2) 0.037(2) Uani 0.715(9) 1 d PG A 1 
C82 C 0.4280(7) 0.5651(4) -0.0088(3) 0.050(3) Uani 0.715(9) 1 d PG A 1 
H82A H 0.4091 0.5307 0.0009 0.061 Uiso 0.715(9) 1 calc PR A 1 
C83 C 0.4282(5) 0.5766(4) -0.0544(3) 0.058(3) Uani 0.715(9) 1 d PG A 1 
H83A H 0.4095 0.5500 -0.0754 0.070 Uiso 0.715(9) 1 calc PR A 1 
C84 C 0.4562(5) 0.6275(4) -0.0688(2) 0.050(3) Uani 0.715(9) 1 d PG A 1 
C85 C 0.4840(5) 0.6668(3) -0.0377(3) 0.049(3) Uani 0.715(9) 1 d PG A 1 
H85A H 0.5029 0.7012 -0.0474 0.059 Uiso 0.715(9) 1 calc PR A 1 
C86 C 0.4838(7) 0.6553(4) 0.0079(3) 0.043(3) Uani 0.715(9) 1 d PG A 1 
H86A H 0.5026 0.6819 0.0289 0.051 Uiso 0.715(9) 1 calc PR A 1 
O8 O 0.4641(5) 0.6415(4) -0.1124(3) 0.077(3) Uani 0.715(9) 1 d P A 1 
C87 C 0.4433(9) 0.6011(7) -0.1449(5) 0.092(5) Uani 0.715(9) 1 d P A 1 
H87A H 0.4514 0.6159 -0.1744 0.138 Uiso 0.715(9) 1 calc PR A 1 
H87B H 0.3907 0.5918 -0.1432 0.138 Uiso 0.715(9) 1 calc PR A 1 
H87C H 0.4734 0.5675 -0.1396 0.138 Uiso 0.715(9) 1 calc PR A 1 
C81B C 0.453(2) 0.5978(14) 0.0202(5) 0.037(2) Uani 0.285(9) 1 d PG A 2 
C82B C 0.441(2) 0.5483(11) -0.0038(9) 0.050(3) Uani 0.285(9) 1 d PG A 2 
H82B H 0.4337 0.5143 0.0114 0.061 Uiso 0.285(9) 1 calc PR A 2 
C83B C 0.4385(18) 0.5491(9) -0.0504(8) 0.058(3) Uani 0.285(9) 1 d PG A 2 
H83B H 0.4302 0.5157 -0.0666 0.070 Uiso 0.285(9) 1 calc PR A 2 
C84B C 0.4486(16) 0.5994(10) -0.0728(5) 0.050(3) Uani 0.285(9) 1 d PGD A 2 
C85B C 0.4608(16) 0.6488(9) -0.0488(7) 0.049(3) Uani 0.285(9) 1 d PG A 2 
H85B H 0.4676 0.6828 -0.0640 0.059 Uiso 0.285(9) 1 calc PR A 2 
C86B C 0.463(2) 0.6480(12) -0.0023(7) 0.043(3) Uani 0.285(9) 1 d PG A 2 
H86B H 0.4711 0.6815 0.0140 0.051 Uiso 0.285(9) 1 calc PR A 2 
O8B O 0.4405(15) 0.5966(10) -0.1186(5) 0.077(3) Uani 0.285(9) 1 d PD A 2 
C87B C 0.462(2) 0.6417(14) -0.1460(12) 0.092(5) Uani 0.285(9) 1 d PD A 2 
H87D H 0.4509 0.6320 -0.1772 0.138 Uiso 0.285(9) 1 calc PR A 2 
H87E H 0.5147 0.6490 -0.1406 0.138 Uiso 0.285(9) 1 calc PR A 2 
H87F H 0.4334 0.6750 -0.1389 0.138 Uiso 0.285(9) 1 calc PR A 2 
C110 C 0.2581(4) 0.9023(3) 0.1650(2) 0.0345(16) Uani 1 1 d . . . 
H11B H 0.2131 0.9032 0.1794 0.041 Uiso 1 1 calc R . . 
C111 C 0.3188(4) 0.8934(3) 0.2364(2) 0.0332(15) Uani 1 1 d . . . 
C112 C 0.2792(4) 0.8481(3) 0.2517(2) 0.0419(17) Uani 1 1 d . . . 
H11C H 0.2547 0.8236 0.2309 0.050 Uiso 1 1 calc R . . 
C113 C 0.2750(4) 0.8383(3) 0.2966(2) 0.051(2) Uani 1 1 d . . . 
H11D H 0.2472 0.8076 0.3063 0.061 Uiso 1 1 calc R . . 
C114 C 0.3114(4) 0.8731(3) 0.3275(2) 0.0465(19) Uani 1 1 d . . . 
C115 C 0.3542(4) 0.9167(3) 0.3129(2) 0.0485(19) Uani 1 1 d . . . 
H11E H 0.3816 0.9395 0.3337 0.058 Uiso 1 1 calc R . . 
C116 C 0.3569(4) 0.9269(3) 0.2677(2) 0.0457(18) Uani 1 1 d . . . 
H11F H 0.3852 0.9573 0.2581 0.055 Uiso 1 1 calc R . . 
C117 C 0.3412(6) 0.8950(4) 0.4041(3) 0.077(3) Uani 1 1 d . . . 
H11G H 0.3304 0.8822 0.4338 0.115 Uiso 1 1 calc R . . 
H11H H 0.3250 0.9337 0.4003 0.115 Uiso 1 1 calc R . . 
H11I H 0.3947 0.8926 0.4007 0.115 Uiso 1 1 calc R . . 
C121 C 0.1833(4) 0.9109(3) 0.0988(2) 0.0364(16) Uani 1 1 d . . . 
C122 C 0.1408(4) 0.9565(3) 0.1113(2) 0.0450(18) Uani 1 1 d . . . 
H12B H 0.1588 0.9793 0.1353 0.054 Uiso 1 1 calc R . . 
C123 C 0.0733(4) 0.9686(3) 0.0894(3) 0.056(2) Uani 1 1 d . . . 
H12C H 0.0449 0.9994 0.0982 0.068 Uiso 1 1 calc R . . 
C124 C 0.0475(4) 0.9348(3) 0.0538(2) 0.051(2) Uani 1 1 d . . . 
C125 C 0.0888(4) 0.8894(3) 0.0406(2) 0.0466(19) Uani 1 1 d . . . 
H12D H 0.0710 0.8667 0.0165 0.056 Uiso 1 1 calc R . . 
C126 C 0.1566(4) 0.8779(3) 0.0634(2) 0.0416(17) Uani 1 1 d . . . 
H12E H 0.1850 0.8471 0.0546 0.050 Uiso 1 1 calc R . . 
C127 C -0.0479(5) 0.9184(4) -0.0033(3) 0.085(3) Uani 1 1 d . . . 
H12F H -0.0966 0.9325 -0.0141 0.127 Uiso 1 1 calc R . . 
H12G H -0.0522 0.8792 0.0051 0.127 Uiso 1 1 calc R . . 
H12H H -0.0131 0.9218 -0.0267 0.127 Uiso 1 1 calc R . . 
C130 C 0.3849(4) 1.0168(3) 0.1181(2) 0.0381(17) Uani 1 1 d . . . 
H13B H 0.3814 1.0562 0.1181 0.046 Uiso 1 1 calc R . . 
C131 C 0.4422(4) 1.0237(3) 0.1907(2) 0.0362(16) Uani 1 1 d . . . 
C132 C 0.5090(4) 1.0113(3) 0.2146(2) 0.0410(17) Uani 1 1 d . . . 
H13C H 0.5391 0.9821 0.2046 0.049 Uiso 1 1 calc R . . 
C133 C 0.5325(4) 1.0410(3) 0.2528(2) 0.0427(17) Uani 1 1 d . . . 
H13D H 0.5774 1.0314 0.2691 0.051 Uiso 1 1 calc R . . 
C134 C 0.4887(4) 1.0849(3) 0.2666(2) 0.0429(18) Uani 1 1 d . . . 
C135 C 0.4230(4) 1.0975(3) 0.2434(2) 0.0432(18) Uani 1 1 d . . . 
H13E H 0.3939 1.1276 0.2528 0.052 Uiso 1 1 calc R . . 
C136 C 0.3983(4) 1.0666(3) 0.2063(2) 0.0392(17) Uani 1 1 d . . . 
H13F H 0.3516 1.0748 0.1914 0.047 Uiso 1 1 calc R . . 
C137 C 0.5761(5) 1.1078(4) 0.3282(3) 0.076(3) Uani 1 1 d . . . 
H13G H 0.5821 1.1346 0.3526 0.114 Uiso 1 1 calc R . . 
H13H H 0.6176 1.1114 0.3091 0.114 Uiso 1 1 calc R . . 
H13I H 0.5752 1.0700 0.3403 0.114 Uiso 1 1 calc R . . 
C141 C 0.3236(4) 1.0181(3) 0.0459(2) 0.0345(16) Uani 1 1 d . . . 
C142 C 0.2629(4) 0.9936(3) 0.0204(2) 0.0457(18) Uani 1 1 d . . . 
H14A H 0.2453 0.9580 0.0284 0.055 Uiso 1 1 calc R . . 
C143 C 0.2294(4) 1.0209(3) -0.0158(2) 0.0483(19) Uani 1 1 d . . . 
H14B H 0.1892 1.0037 -0.0324 0.058 Uiso 1 1 calc R . . 
C144 C 0.2538(4) 1.0737(3) -0.0283(2) 0.0444(18) Uani 1 1 d . . . 
C145 C 0.3133(4) 1.0975(3) -0.0042(2) 0.0427(18) Uani 1 1 d . . . 
H14C H 0.3306 1.1331 -0.0122 0.051 Uiso 1 1 calc R . . 
C146 C 0.3483(4) 1.0692(3) 0.0321(2) 0.0399(17) Uani 1 1 d . . . 
H14D H 0.3901 1.0858 0.0477 0.048 Uiso 1 1 calc R . . 
C147 C 0.2382(5) 1.1519(3) -0.0784(3) 0.069(3) Uani 1 1 d . . . 
H14E H 0.2057 1.1649 -0.1035 0.104 Uiso 1 1 calc R . . 
H14F H 0.2892 1.1490 -0.0874 0.104 Uiso 1 1 calc R . . 
H14G H 0.2366 1.1783 -0.0538 0.104 Uiso 1 1 calc R . . 
C150 C 0.5236(4) 0.8991(3) 0.0774(2) 0.0384(17) Uani 1 1 d . B . 
H15A H 0.5686 0.8994 0.0629 0.046 Uiso 1 1 calc R . . 
C151 C 0.5961(4) 0.9078(3) 0.1453(2) 0.0355(16) Uani 1 1 d . . . 
C152 C 0.6140(4) 0.8768(3) 0.1830(2) 0.0483(19) Uani 1 1 d . . . 
H15B H 0.5811 0.8484 0.1912 0.058 Uiso 1 1 calc R . . 
C153 C 0.6790(4) 0.8863(3) 0.2091(3) 0.053(2) Uani 1 1 d . . . 
H15C H 0.6890 0.8653 0.2354 0.064 Uiso 1 1 calc R . . 
C154 C 0.7291(4) 0.9258(3) 0.1971(3) 0.0502(19) Uani 1 1 d . . . 
C155 C 0.7134(4) 0.9560(3) 0.1575(3) 0.058(2) Uani 1 1 d . . . 
H15D H 0.7482 0.9824 0.1481 0.069 Uiso 1 1 calc R . . 
C156 C 0.6474(4) 0.9474(3) 0.1324(3) 0.054(2) Uani 1 1 d . . . 
H15E H 0.6369 0.9685 0.1062 0.065 Uiso 1 1 calc R . . 
C157 C 0.8107(5) 0.9102(5) 0.2609(3) 0.089(3) Uani 1 1 d . . . 
H15F H 0.8583 0.9230 0.2747 0.134 Uiso 1 1 calc R . . 
H15G H 0.8135 0.8702 0.2548 0.134 Uiso 1 1 calc R . . 
H15H H 0.7714 0.9171 0.2811 0.134 Uiso 1 1 calc R . . 
C161 C 0.4595(8) 0.8903(8) 0.0049(4) 0.0370(17) Uani 0.573(16) 1 d PG B 1 
C162 C 0.4957(8) 0.8434(7) -0.0110(6) 0.033(4) Uani 0.573(16) 1 d PG B 1 
H16A H 0.5210 0.8186 0.0092 0.039 Uiso 0.573(16) 1 calc PR B 1 
C163 C 0.4947(9) 0.8332(5) -0.0568(6) 0.038(4) Uani 0.573(16) 1 d PG B 1 
H16B H 0.5192 0.8015 -0.0675 0.046 Uiso 0.573(16) 1 calc PR B 1 
C164 C 0.4574(9) 0.8700(7) -0.0867(4) 0.051(4) Uani 0.573(16) 1 d PGD B 1 
C165 C 0.4212(9) 0.9168(7) -0.0708(5) 0.069(6) Uani 0.573(16) 1 d PG B 1 
H16C H 0.3960 0.9417 -0.0910 0.082 Uiso 0.573(16) 1 calc PR B 1 
C166 C 0.4222(9) 0.9270(7) -0.0250(5) 0.053(5) Uani 0.573(16) 1 d PG B 1 
H16D H 0.3977 0.9587 -0.0143 0.063 Uiso 0.573(16) 1 calc PR B 1 
O16 O 0.454(2) 0.8669(8) -0.1325(5) 0.078(5) Uani 0.573(16) 1 d PD B 1 
C167 C 0.489(4) 0.8226(19) -0.155(3) 0.096(9) Uani 0.573(16) 1 d PD B 1 
H16E H 0.4780 0.8258 -0.1867 0.144 Uiso 0.573(16) 1 calc PR B 1 
H16F H 0.4710 0.7869 -0.1442 0.144 Uiso 0.573(16) 1 calc PR B 1 
H16G H 0.5431 0.8248 -0.1481 0.144 Uiso 0.573(16) 1 calc PR B 1 
C171 C 0.4610(12) 0.8920(11) 0.0067(6) 0.0370(17) Uani 0.427(16) 1 d PG B 2 
C172 C 0.4686(12) 0.8410(9) -0.0151(9) 0.033(4) Uani 0.427(16) 1 d PG B 2 
H17A H 0.4748 0.8077 0.0017 0.039 Uiso 0.427(16) 1 calc PR B 2 
C173 C 0.4670(12) 0.8391(8) -0.0616(9) 0.038(4) Uani 0.427(16) 1 d PG B 2 
H17B H 0.4721 0.8046 -0.0763 0.046 Uiso 0.427(16) 1 calc PR B 2 
C174 C 0.4578(15) 0.8884(10) -0.0863(6) 0.051(4) Uani 0.427(16) 1 d PGD B 2 
C175 C 0.4502(16) 0.9394(8) -0.0645(7) 0.069(6) Uani 0.427(16) 1 d PG B 2 
H17C H 0.4440 0.9727 -0.0812 0.082 Uiso 0.427(16) 1 calc PR B 2 
C176 C 0.4518(13) 0.9412(9) -0.0180(7) 0.053(5) Uani 0.427(16) 1 d PG B 2 
H17D H 0.4466 0.9758 -0.0033 0.063 Uiso 0.427(16) 1 calc PR B 2 
O16B O 0.455(3) 0.8895(11) -0.1320(7) 0.078(5) Uani 0.427(16) 1 d PD B 2 
C177 C 0.473(6) 0.837(2) -0.151(4) 0.096(9) Uani 0.427(16) 1 d PD B 2 
H17E H 0.4776 0.8421 -0.1832 0.144 Uiso 0.427(16) 1 calc PR B 2 
H17F H 0.4330 0.8104 -0.1468 0.144 Uiso 0.427(16) 1 calc PR B 2 
H17G H 0.5195 0.8234 -0.1373 0.144 Uiso 0.427(16) 1 calc PR B 2 
S S 0.05070(15) 0.74121(10) -0.06439(9) 0.0723(7) Uani 1 1 d D . . 
O0 O 0.0964(4) 0.7453(3) -0.1008(2) 0.095(2) Uani 1 1 d . C . 
F1A F -0.0610(7) 0.7202(7) -0.1229(4) 0.147(6) Uani 0.728(15) 1 d PD C 1 
F2A F -0.0402(7) 0.8073(5) -0.1091(4) 0.136(5) Uani 0.728(15) 1 d PD C 1 
F3A F -0.0942(7) 0.7561(6) -0.0619(4) 0.140(5) Uani 0.728(15) 1 d PD C 1 
C15A C -0.0419(7) 0.7567(5) -0.0910(4) 0.086(4) Uani 0.728(15) 1 d PD C 1 
F1B F -0.037(2) 0.6813(13) -0.1121(9) 0.147(6) Uani 0.272(15) 1 d PD C 2 
F2B F -0.066(2) 0.7696(17) -0.1170(11) 0.136(5) Uani 0.272(15) 1 d PD C 2 
F3B F -0.089(2) 0.7223(16) -0.0573(11) 0.140(5) Uani 0.272(15) 1 d PD C 2 
C15B C -0.0434(10) 0.7288(11) -0.0898(8) 0.086(4) Uani 0.272(15) 1 d PD C 2 
O1A O 0.0558(9) 0.7879(7) -0.0351(6) 0.137(6) Uani 0.87(4) 1 d PD C 1 
O2A O 0.061(6) 0.706(4) -0.026(2) 0.111(5) Uani 0.13(4) 1 d PD C 1 
O1B O 0.063(7) 0.761(5) -0.0198(13) 0.137(6) Uani 0.13(4) 1 d PD C 2 
O2B O 0.0452(8) 0.6855(5) -0.0473(6) 0.111(5) Uani 0.87(4) 1 d PD C 2 
Cl1 Cl 0.86676(17) 0.21530(17) 0.61748(10) 0.1162(11) Uani 1 1 d D . . 
C1S C 0.7932(5) 0.2275(4) 0.5775(3) 0.088(3) Uani 1 1 d D . . 
H1SA H 0.7658 0.1924 0.5713 0.106 Uiso 1 1 calc R . . 
H1SB H 0.7584 0.2547 0.5892 0.106 Uiso 1 1 calc R . . 
Cl2 Cl 0.8262(2) 0.25303(12) 0.52820(12) 0.1255(12) Uani 1 1 d D . . 
Cl3A Cl 0.6488(4) 0.2046(3) 0.4658(3) 0.140(3) Uani 0.50 1 d PD D 1 
C2SA C 0.5568(8) 0.2220(8) 0.4511(7) 0.112(8) Uani 0.50 1 d PD D 1 
H2SA H 0.5320 0.1894 0.4366 0.134 Uiso 0.50 1 calc PR D 1 
H2SB H 0.5314 0.2301 0.4784 0.134 Uiso 0.50 1 calc PR D 1 
Cl4A Cl 0.5459(6) 0.2779(5) 0.4161(5) 0.219(6) Uani 0.50 1 d PD D 1 
Cl5A Cl 0.3628(10) 0.2490(6) 0.3564(8) 0.221(12) Uani 0.30 1 d PD E 2 
C3SA C 0.4294(13) 0.2588(14) 0.4010(9) 0.087(10) Uiso 0.30 1 d PD E 2 
H3SA H 0.4315 0.2994 0.4063 0.105 Uiso 0.30 1 calc PR E 2 
H3SD H 0.4079 0.2422 0.4272 0.105 Uiso 0.30 1 calc PR E 2 
Cl6A Cl 0.5208(12) 0.2364(7) 0.4025(5) 0.186(9) Uani 0.30 1 d PD E 2 
Cl5B Cl 0.2944(4) 0.2594(2) 0.3521(2) 0.1073(19) Uani 0.50 1 d PD F 4 
C3SB C 0.3891(9) 0.2672(10) 0.3672(14) 0.18(2) Uiso 0.50 1 d PD F 4 
H3SB H 0.3980 0.2719 0.3996 0.214 Uiso 0.50 1 calc PR F 4 
H3SC H 0.4102 0.2995 0.3520 0.214 Uiso 0.50 1 calc PR F 4 
Cl6B Cl 0.4266(6) 0.2045(4) 0.3492(4) 0.212(5) Uani 0.50 1 d PD F 4 
Cl7A Cl 0.5621(7) 0.7370(5) -0.2281(4) 0.118(4) Uani 0.50 1 d PD G 1 
C4SA C 0.4898(7) 0.7399(15) -0.2699(6) 0.124(7) Uiso 0.50 1 d PD G 1 
H4S1 H 0.4999 0.7718 -0.2894 0.149 Uiso 0.50 1 calc PR G 1 
H4S2 H 0.4927 0.7058 -0.2880 0.149 Uiso 0.50 1 calc PR G 1 
Cl8A Cl 0.3984(6) 0.7463(5) -0.2547(4) 0.141(4) Uani 0.50 1 d PD G 1 
Cl7B Cl 0.5961(11) 0.7439(8) -0.2572(15) 0.33(3) Uani 0.30 1 d PD H 2 
C4SB C 0.5101(17) 0.740(2) -0.2878(12) 0.124(7) Uiso 0.30 1 d PD H 2 
H4S3 H 0.5049 0.7730 -0.3070 0.149 Uiso 0.30 1 calc PR H 2 
H4S4 H 0.5113 0.7069 -0.3076 0.149 Uiso 0.30 1 calc PR H 2 
Cl8B Cl 0.4304(19) 0.735(4) -0.258(2) 0.57(5) Uiso 0.30 1 d PD H 2 
Cl7C Cl 0.517(2) 0.7266(16) -0.2305(13) 0.22(3) Uani 0.20 1 d PD I 3 
C4SC C 0.419(2) 0.727(4) -0.2340(14) 0.124(7) Uiso 0.20 1 d PD I 3 
H4S5 H 0.4014 0.6905 -0.2238 0.149 Uiso 0.20 1 calc PR I 3 
H4S6 H 0.4022 0.7555 -0.2131 0.149 Uiso 0.20 1 calc PR I 3 
Cl8C Cl 0.375(2) 0.7405(19) -0.2866(13) 0.26(2) Uani 0.20 1 d PD I 3 
Cl9 Cl 0.2161(3) 0.58549(15) -0.09903(15) 0.1600(17) Uani 1 1 d D . . 
C5S C 0.1251(7) 0.6030(7) -0.1155(5) 0.186(8) Uiso 1 1 d D . . 
H5SA H 0.0935 0.5942 -0.0909 0.223 Uiso 1 1 calc R . . 
H5SB H 0.1227 0.6437 -0.1203 0.223 Uiso 1 1 calc R . . 
Cl10 Cl 0.0878(3) 0.57084(17) -0.16281(15) 0.1610(16) Uani 1 1 d D . . 
Cl11 Cl 0.2198(3) 0.90038(14) -0.09494(12) 0.1515(17) Uani 1 1 d D . . 
C6S C 0.1241(6) 0.8878(8) -0.0995(5) 0.207(9) Uani 1 1 d D . . 
H6SA H 0.1162 0.8471 -0.0984 0.248 Uiso 1 1 calc R . . 
H6SB H 0.1022 0.9040 -0.0733 0.248 Uiso 1 1 calc R . . 
Cl12 Cl 0.0760(3) 0.9135(2) -0.14688(19) 0.203(2) Uani 1 1 d D . . 
Cl13 Cl 0.4154(2) 1.24487(15) -0.09963(17) 0.1536(16) Uani 1 1 d D . . 
C7S C 0.3369(6) 1.2889(4) -0.1060(4) 0.129(5) Uani 1 1 d D . . 
H7SA H 0.3115 1.2897 -0.0779 0.155 Uiso 1 1 calc R . . 
H7SB H 0.3533 1.3272 -0.1123 0.155 Uiso 1 1 calc R . . 
Cl14 Cl 0.2743(3) 1.26614(17) -0.14923(15) 0.1615(17) Uani 1 1 d D . . 
Cl15 Cl 0.8030(11) 0.7257(7) 0.3561(4) 0.205(6) Uani 0.40 1 d PD J 1 
C8S C 0.7351(19) 0.7762(14) 0.3406(10) 0.22(4) Uani 0.40 1 d PD J 1 
H8SA H 0.6935 0.7738 0.3603 0.269 Uiso 0.40 1 calc PR J 1 
H8SB H 0.7569 0.8139 0.3434 0.269 Uiso 0.40 1 calc PR J 1 
Cl16 Cl 0.7026(16) 0.7640(12) 0.2856(10) 0.199(13) Uani 0.40 1 d PD J 1 
Cl17 Cl 0.7012(11) 0.7516(6) 0.2928(6) 0.160(6) Uani 0.60 1 d PD K 2 
C9S C 0.7372(12) 0.7437(10) 0.3474(7) 0.145(16) Uani 0.60 1 d PD K 2 
H9SA H 0.7506 0.7043 0.3528 0.174 Uiso 0.60 1 calc PR K 2 
H9SB H 0.6989 0.7540 0.3679 0.174 Uiso 0.60 1 calc PR K 2 
Cl18 Cl 0.8157(5) 0.7855(3) 0.3580(2) 0.133(2) Uani 0.60 1 d PD K 2 
 
loop_ 
 _atom_site_aniso_label 
 _atom_site_aniso_U_11 
 _atom_site_aniso_U_22 
 _atom_site_aniso_U_33 
 _atom_site_aniso_U_23 
 _atom_site_aniso_U_13 
 _atom_site_aniso_U_12 
Mo1 0.0285(3) 0.0232(3) 0.0350(3) 0.0006(2) -0.0026(2) 0.0005(2) 
Mo2 0.0285(3) 0.0235(3) 0.0352(3) -0.0015(2) -0.0031(2) 0.0000(2) 
Mo3 0.0332(4) 0.0220(3) 0.0377(3) -0.0011(2) -0.0037(3) 0.0007(2) 
Mo4 0.0320(4) 0.0231(3) 0.0364(3) 0.0006(2) -0.0027(3) 0.0009(2) 
N1 0.029(3) 0.026(3) 0.031(3) -0.002(2) -0.004(2) 0.001(2) 
N2 0.033(3) 0.022(3) 0.032(3) -0.001(2) -0.004(2) 0.002(2) 
N3 0.042(4) 0.027(3) 0.037(3) 0.001(2) 0.004(3) -0.002(2) 
N4 0.033(3) 0.024(3) 0.033(3) 0.001(2) 0.001(2) -0.002(2) 
N5 0.034(3) 0.026(3) 0.038(3) 0.002(2) -0.007(3) -0.001(2) 
N6 0.031(3) 0.025(3) 0.042(3) -0.005(3) -0.001(3) 0.001(2) 
N7 0.027(3) 0.029(3) 0.046(4) -0.003(2) -0.001(3) 0.003(2) 
N8 0.035(3) 0.031(3) 0.037(3) -0.004(2) 0.004(3) 0.005(2) 
N9 0.032(3) 0.023(3) 0.035(3) -0.002(2) -0.003(2) 0.001(2) 
N10 0.033(3) 0.023(3) 0.033(3) -0.003(2) 0.000(2) -0.001(2) 
N11 0.040(4) 0.031(3) 0.039(3) -0.002(2) 0.009(3) 0.001(3) 
N12 0.028(3) 0.029(3) 0.044(4) 0.001(2) 0.002(3) 0.000(2) 
N13 0.034(3) 0.029(3) 0.043(3) -0.002(3) -0.009(3) -0.001(2) 
N14 0.036(3) 0.026(3) 0.039(3) 0.004(2) -0.006(3) 0.001(2) 
N15 0.034(3) 0.028(3) 0.044(4) 0.002(2) -0.002(3) 0.004(2) 
N16 0.036(3) 0.029(3) 0.042(3) 0.006(2) 0.003(3) 0.004(2) 
O3 0.078(4) 0.059(3) 0.037(3) -0.005(2) 0.005(3) 0.007(3) 
O4 0.043(3) 0.082(4) 0.061(4) 0.006(3) -0.017(3) -0.017(3) 
O5 0.066(4) 0.067(4) 0.058(3) 0.026(3) -0.001(3) 0.009(3) 
O6 0.080(4) 0.072(4) 0.047(3) -0.018(3) -0.005(3) 0.009(3) 
O7 0.040(3) 0.089(4) 0.066(4) -0.002(3) -0.009(3) 0.017(3) 
O11 0.076(4) 0.069(4) 0.041(3) 0.004(3) -0.004(3) -0.016(3) 
O12 0.048(4) 0.096(5) 0.063(4) -0.007(3) -0.017(3) 0.017(3) 
O13 0.070(4) 0.062(4) 0.050(3) -0.019(3) -0.008(3) 0.006(3) 
O14 0.061(4) 0.051(3) 0.052(3) 0.014(3) -0.004(3) -0.005(3) 
O15 0.050(4) 0.082(4) 0.074(4) -0.004(3) -0.013(3) -0.020(3) 
C1 0.023(4) 0.028(4) 0.031(4) -0.001(3) 0.003(3) -0.001(3) 
C2 0.028(4) 0.027(4) 0.035(4) -0.001(3) 0.001(3) 0.006(3) 
C3 0.039(4) 0.028(4) 0.040(4) 0.004(3) -0.003(3) 0.003(3) 
C4 0.052(5) 0.036(4) 0.032(4) 0.004(3) -0.009(3) -0.001(3) 
C5 0.055(5) 0.034(4) 0.037(4) -0.007(3) -0.012(3) -0.006(3) 
C6 0.041(4) 0.025(4) 0.041(4) -0.003(3) -0.004(3) 0.000(3) 
C7 0.023(3) 0.027(4) 0.033(4) -0.001(3) 0.000(3) 0.000(3) 
C8 0.032(4) 0.024(4) 0.033(4) -0.002(3) 0.003(3) 0.000(3) 
C9 0.030(4) 0.022(3) 0.035(4) -0.001(3) 0.000(3) 0.004(3) 
C10 0.051(5) 0.027(4) 0.040(4) 0.003(3) -0.007(3) 0.001(3) 
C11 0.056(5) 0.042(4) 0.034(4) 0.001(3) -0.012(3) 0.003(4) 
C12 0.054(5) 0.040(4) 0.037(4) -0.006(3) -0.010(3) -0.006(3) 
C13 0.034(4) 0.032(4) 0.037(4) -0.003(3) -0.005(3) -0.002(3) 
C14 0.022(3) 0.031(4) 0.031(4) -0.002(3) 0.001(3) 0.000(3) 
C30 0.022(4) 0.034(4) 0.041(4) 0.001(3) 0.004(3) -0.001(3) 
C31 0.028(4) 0.035(4) 0.040(4) 0.001(3) 0.004(3) -0.002(3) 
C32 0.050(5) 0.040(4) 0.045(5) -0.003(3) 0.007(4) 0.004(3) 
C33 0.043(4) 0.041(4) 0.050(5) 0.008(3) -0.005(3) 0.005(3) 
C34 0.043(4) 0.040(4) 0.044(4) -0.001(3) 0.004(3) -0.008(3) 
C35 0.059(5) 0.038(4) 0.042(4) -0.008(3) 0.003(4) 0.006(4) 
C36 0.041(4) 0.041(4) 0.046(4) 0.005(3) -0.005(3) 0.002(3) 
C37 0.083(7) 0.088(7) 0.043(5) 0.009(4) 0.009(5) -0.005(5) 
C41 0.025(4) 0.035(4) 0.035(4) -0.008(3) 0.000(3) 0.001(3) 
C42 0.049(5) 0.034(4) 0.041(4) 0.004(3) -0.007(3) -0.005(3) 
C43 0.045(5) 0.051(5) 0.047(5) 0.003(4) -0.002(4) -0.018(4) 
C44 0.037(5) 0.052(5) 0.051(5) -0.003(4) -0.008(4) -0.005(4) 
C45 0.039(4) 0.049(5) 0.042(4) 0.009(3) -0.003(3) 0.001(3) 
C46 0.036(4) 0.038(4) 0.044(4) 0.010(3) -0.003(3) -0.005(3) 
C47 0.057(6) 0.095(7) 0.065(6) 0.011(5) -0.032(5) -0.013(5) 
C50 0.034(4) 0.018(3) 0.051(4) 0.002(3) 0.002(3) 0.000(3) 
C51 0.039(4) 0.023(4) 0.044(4) 0.002(3) 0.000(3) 0.002(3) 
C52 0.050(5) 0.032(4) 0.040(4) 0.006(3) 0.000(3) -0.001(3) 
C53 0.046(5) 0.049(5) 0.048(4) 0.003(4) -0.002(4) 0.006(4) 
C54 0.055(5) 0.043(5) 0.047(5) 0.011(4) 0.005(4) 0.014(4) 
C55 0.047(5) 0.032(4) 0.059(5) 0.008(3) 0.007(4) -0.004(3) 
C56 0.040(4) 0.032(4) 0.052(4) 0.000(3) -0.003(3) -0.002(3) 
C57 0.069(7) 0.103(8) 0.073(6) 0.036(5) -0.004(5) 0.014(6) 
C61 0.035(4) 0.027(4) 0.040(4) 0.000(3) 0.005(3) -0.003(3) 
C62 0.039(4) 0.035(4) 0.051(5) -0.004(3) 0.003(3) 0.009(3) 
C63 0.051(5) 0.045(5) 0.038(4) -0.002(3) -0.005(3) 0.004(4) 
C64 0.061(5) 0.047(5) 0.039(4) -0.006(4) 0.007(4) -0.006(4) 
C65 0.053(5) 0.037(4) 0.053(5) -0.007(4) 0.005(4) 0.007(4) 
C66 0.050(5) 0.028(4) 0.049(4) -0.004(3) 0.000(4) 0.003(3) 
C67 0.087(8) 0.103(8) 0.053(6) -0.034(5) -0.011(5) 0.001(6) 
C70 0.028(4) 0.031(4) 0.037(4) -0.004(3) 0.003(3) 0.001(3) 
C71 0.027(4) 0.034(4) 0.042(4) 0.005(3) 0.003(3) -0.005(3) 
C72 0.041(5) 0.047(5) 0.066(5) -0.016(4) -0.009(4) 0.009(4) 
C73 0.059(6) 0.051(5) 0.074(6) -0.012(4) 0.005(5) 0.019(4) 
C74 0.027(4) 0.059(5) 0.060(5) 0.007(4) -0.003(4) 0.006(4) 
C75 0.042(5) 0.060(5) 0.054(5) -0.010(4) -0.003(4) -0.001(4) 
C76 0.033(4) 0.046(4) 0.054(5) -0.010(4) -0.004(3) 0.009(3) 
C77 0.055(6) 0.126(9) 0.065(6) -0.010(6) -0.016(5) 0.025(6) 
C81 0.031(4) 0.044(6) 0.035(4) -0.002(4) 0.003(3) 0.003(4) 
C82 0.060(8) 0.043(8) 0.048(6) 0.000(5) 0.003(5) 0.001(6) 
C83 0.068(8) 0.060(10) 0.046(6) -0.011(8) -0.001(5) -0.003(8) 
C84 0.051(6) 0.056(10) 0.045(6) 0.004(7) 0.005(5) 0.004(7) 
C85 0.036(8) 0.047(7) 0.063(8) 0.009(6) -0.005(5) -0.009(5) 
C86 0.042(10) 0.043(6) 0.043(6) 0.001(5) -0.004(5) -0.005(5) 
O8 0.093(7) 0.100(7) 0.038(5) 0.006(5) 0.002(4) -0.030(5) 
C87 0.096(11) 0.136(16) 0.044(7) -0.004(10) 0.012(8) -0.023(11) 
C81B 0.031(4) 0.044(6) 0.035(4) -0.002(4) 0.003(3) 0.003(4) 
C82B 0.060(8) 0.043(8) 0.048(6) 0.000(5) 0.003(5) 0.001(6) 
C83B 0.068(8) 0.060(10) 0.046(6) -0.011(8) -0.001(5) -0.003(8) 
C84B 0.051(6) 0.056(10) 0.045(6) 0.004(7) 0.005(5) 0.004(7) 
C85B 0.036(8) 0.047(7) 0.063(8) 0.009(6) -0.005(5) -0.009(5) 
C86B 0.042(10) 0.043(6) 0.043(6) 0.001(5) -0.004(5) -0.005(5) 
O8B 0.093(7) 0.100(7) 0.038(5) 0.006(5) 0.002(4) -0.030(5) 
C87B 0.096(11) 0.136(16) 0.044(7) -0.004(10) 0.012(8) -0.023(11) 
C110 0.032(4) 0.034(4) 0.036(4) 0.002(3) -0.005(3) 0.001(3) 
C111 0.028(4) 0.034(4) 0.037(4) 0.000(3) -0.001(3) 0.008(3) 
C112 0.049(5) 0.033(4) 0.043(4) -0.001(3) -0.005(3) -0.002(3) 
C113 0.064(5) 0.041(4) 0.046(5) 0.005(4) -0.004(4) -0.011(4) 
C114 0.048(5) 0.046(5) 0.045(5) 0.009(4) -0.002(4) 0.011(4) 
C115 0.055(5) 0.043(5) 0.047(5) -0.011(4) -0.001(4) -0.007(4) 
C116 0.056(5) 0.034(4) 0.047(5) -0.004(3) 0.001(4) -0.009(3) 
C117 0.098(8) 0.092(7) 0.040(5) -0.004(4) -0.003(5) -0.031(6) 
C121 0.030(4) 0.042(4) 0.038(4) 0.012(3) 0.001(3) 0.003(3) 
C122 0.051(5) 0.037(4) 0.047(4) -0.004(3) 0.001(4) 0.011(4) 
C123 0.056(6) 0.053(5) 0.059(5) -0.004(4) -0.001(4) 0.019(4) 
C124 0.038(5) 0.060(5) 0.052(5) 0.008(4) -0.003(4) 0.008(4) 
C125 0.046(5) 0.048(5) 0.045(4) -0.006(3) -0.009(4) 0.000(4) 
C126 0.041(4) 0.032(4) 0.051(4) -0.002(3) -0.003(4) 0.003(3) 
C127 0.069(7) 0.099(8) 0.081(7) -0.014(6) -0.030(5) 0.020(6) 
C130 0.038(4) 0.023(4) 0.053(5) -0.002(3) 0.008(4) -0.004(3) 
C131 0.042(4) 0.027(4) 0.040(4) 0.004(3) -0.001(3) -0.004(3) 
C132 0.042(4) 0.032(4) 0.049(4) -0.004(3) -0.002(3) 0.006(3) 
C133 0.041(4) 0.038(4) 0.048(4) 0.000(3) -0.008(3) 0.003(3) 
C134 0.056(5) 0.037(4) 0.035(4) -0.005(3) 0.001(4) -0.001(4) 
C135 0.046(5) 0.039(4) 0.045(4) -0.005(3) 0.006(4) 0.010(3) 
C136 0.031(4) 0.038(4) 0.049(4) -0.001(3) 0.001(3) 0.005(3) 
C137 0.081(7) 0.082(7) 0.062(6) -0.032(5) -0.024(5) 0.010(5) 
C141 0.038(4) 0.027(4) 0.039(4) -0.004(3) 0.006(3) -0.003(3) 
C142 0.058(5) 0.028(4) 0.050(4) 0.006(3) -0.003(4) -0.009(3) 
C143 0.056(5) 0.045(5) 0.044(4) 0.000(4) 0.000(4) -0.008(4) 
C144 0.053(5) 0.042(4) 0.039(4) 0.005(3) 0.006(4) 0.001(4) 
C145 0.053(5) 0.026(4) 0.050(4) 0.005(3) 0.006(4) 0.001(3) 
C146 0.040(4) 0.031(4) 0.049(4) 0.003(3) 0.003(3) -0.003(3) 
C147 0.087(7) 0.043(5) 0.075(6) 0.018(4) -0.012(5) -0.001(4) 
C150 0.025(4) 0.036(4) 0.054(5) 0.000(3) -0.001(3) 0.006(3) 
C151 0.026(4) 0.032(4) 0.047(4) -0.005(3) 0.000(3) -0.001(3) 
C152 0.044(5) 0.045(4) 0.055(5) 0.007(4) -0.002(4) -0.006(4) 
C153 0.042(5) 0.060(5) 0.057(5) 0.007(4) -0.005(4) -0.003(4) 
C154 0.042(5) 0.056(5) 0.053(5) -0.008(4) -0.002(4) -0.001(4) 
C155 0.044(5) 0.056(5) 0.073(6) 0.003(4) 0.001(4) -0.016(4) 
C156 0.052(5) 0.038(4) 0.071(5) 0.010(4) -0.006(4) -0.001(4) 
C157 0.067(7) 0.129(9) 0.068(7) -0.003(6) -0.016(5) -0.020(6) 
C161 0.031(4) 0.035(4) 0.045(4) 0.001(3) 0.006(3) -0.001(3) 
C162 0.016(12) 0.034(5) 0.046(6) 0.002(4) -0.011(7) -0.010(7) 
C163 0.026(13) 0.036(6) 0.053(7) -0.005(5) 0.002(8) 0.000(6) 
C164 0.067(6) 0.048(13) 0.038(5) 0.007(6) 0.002(4) 0.006(7) 
C165 0.111(17) 0.047(13) 0.047(7) 0.013(8) 0.000(8) 0.040(11) 
C166 0.068(14) 0.047(10) 0.041(7) -0.004(6) -0.016(8) 0.019(9) 
O16 0.127(7) 0.058(16) 0.050(4) 0.007(7) 0.007(4) 0.040(17) 
C167 0.17(3) 0.07(2) 0.056(13) -0.023(18) 0.045(18) -0.01(2) 
C171 0.031(4) 0.035(4) 0.045(4) 0.001(3) 0.006(3) -0.001(3) 
C172 0.016(12) 0.034(5) 0.046(6) 0.002(4) -0.011(7) -0.010(7) 
C173 0.026(13) 0.036(6) 0.053(7) -0.005(5) 0.002(8) 0.000(6) 
C174 0.067(6) 0.048(13) 0.038(5) 0.007(6) 0.002(4) 0.006(7) 
C175 0.111(17) 0.047(13) 0.047(7) 0.013(8) 0.000(8) 0.040(11) 
C176 0.068(14) 0.047(10) 0.041(7) -0.004(6) -0.016(8) 0.019(9) 
O16B 0.127(7) 0.058(16) 0.050(4) 0.007(7) 0.007(4) 0.040(17) 
C177 0.17(3) 0.07(2) 0.056(13) -0.023(18) 0.045(18) -0.01(2) 
S 0.0744(17) 0.0640(16) 0.0802(17) -0.0008(13) 0.0189(14) -0.0016(12) 
O0 0.089(5) 0.094(5) 0.106(5) 0.015(4) 0.045(5) 0.011(4) 
F1A 0.137(10) 0.215(17) 0.083(7) 0.033(8) -0.029(6) -0.073(11) 
F2A 0.125(9) 0.128(11) 0.159(8) 0.063(9) 0.045(7) 0.050(8) 
F3A 0.074(5) 0.224(17) 0.127(7) 0.064(9) 0.040(5) 0.037(9) 
C15A 0.081(9) 0.080(14) 0.097(10) 0.034(11) 0.015(8) 0.004(8) 
F1B 0.137(10) 0.215(17) 0.083(7) 0.033(8) -0.029(6) -0.073(11) 
F2B 0.125(9) 0.128(11) 0.159(8) 0.063(9) 0.045(7) 0.050(8) 
F3B 0.074(5) 0.224(17) 0.127(7) 0.064(9) 0.040(5) 0.037(9) 
C15B 0.081(9) 0.080(14) 0.097(10) 0.034(11) 0.015(8) 0.004(8) 
O1A 0.179(10) 0.111(11) 0.127(9) -0.057(9) 0.051(8) -0.057(10) 
O2A 0.156(9) 0.082(7) 0.097(10) 0.034(7) 0.026(8) 0.025(7) 
O1B 0.179(10) 0.111(11) 0.127(9) -0.057(9) 0.051(8) -0.057(10) 
O2B 0.156(9) 0.082(7) 0.097(10) 0.034(7) 0.026(8) 0.025(7) 
Cl1 0.083(2) 0.160(3) 0.105(2) -0.005(2) 0.0079(17) 0.0035(19) 
C1S 0.079(7) 0.097(8) 0.090(7) -0.001(6) 0.007(6) 0.006(6) 
Cl2 0.162(3) 0.086(2) 0.128(3) 0.0400(18) 0.015(2) -0.0076(19) 
Cl3A 0.142(7) 0.113(5) 0.174(7) 0.015(5) 0.083(6) 0.011(4) 
C2SA 0.14(2) 0.12(2) 0.083(16) 0.005(14) 0.040(15) -0.045(17) 
Cl4A 0.172(10) 0.149(9) 0.343(18) 0.094(11) 0.087(11) 0.014(8) 
Cl5A 0.170(17) 0.087(10) 0.42(4) -0.041(14) 0.14(2) -0.017(11) 
Cl6A 0.32(3) 0.107(11) 0.140(13) -0.005(10) 0.066(14) 0.018(14) 
Cl5B 0.116(5) 0.084(4) 0.121(5) -0.008(3) -0.003(4) -0.008(4) 
Cl6B 0.208(11) 0.159(9) 0.277(13) -0.033(8) 0.076(10) 0.004(8) 
Cl7A 0.135(10) 0.101(6) 0.110(6) -0.032(4) -0.061(7) 0.029(8) 
Cl8A 0.158(8) 0.134(8) 0.134(8) -0.021(7) 0.028(7) -0.037(6) 
Cl7B 0.094(13) 0.067(10) 0.82(8) -0.08(2) -0.09(3) 0.010(8) 
Cl7C 0.31(5) 0.17(3) 0.17(2) -0.10(2) -0.16(4) 0.18(4) 
Cl8C 0.34(6) 0.21(4) 0.23(4) 0.05(3) 0.09(4) 0.06(3) 
Cl9 0.196(5) 0.095(3) 0.183(4) -0.025(2) -0.031(3) 0.022(3) 
Cl10 0.190(4) 0.115(3) 0.173(4) -0.013(3) -0.030(3) -0.010(3) 
Cl11 0.250(5) 0.085(2) 0.121(3) 0.0089(19) 0.025(3) -0.031(3) 
C6S 0.189(19) 0.23(2) 0.206(19) 0.100(16) 0.082(15) -0.027(15) 
Cl12 0.250(6) 0.143(4) 0.218(5) 0.060(4) 0.029(5) 0.020(4) 
Cl13 0.129(3) 0.112(3) 0.222(5) -0.048(3) 0.029(3) -0.013(2) 
C7S 0.178(15) 0.072(8) 0.141(11) -0.014(7) 0.033(10) -0.009(8) 
Cl14 0.210(5) 0.112(3) 0.163(4) 0.032(3) 0.018(3) -0.023(3) 
Cl15 0.25(2) 0.255(19) 0.108(8) -0.010(10) 0.036(10) -0.044(15) 
C8S 0.27(8) 0.15(5) 0.29(8) -0.01(5) 0.25(7) -0.06(5) 
Cl16 0.122(13) 0.139(17) 0.33(3) 0.132(17) 0.008(14) 0.013(10) 
Cl17 0.161(10) 0.087(7) 0.222(13) 0.004(8) -0.052(9) -0.017(6) 
C9S 0.17(3) 0.11(2) 0.16(3) 0.09(2) 0.08(2) 0.06(2) 
Cl18 0.157(7) 0.136(6) 0.107(4) -0.014(4) 0.027(4) -0.009(5) 
 
_geom_special_details 
; 
 All esds (except the esd in the dihedral angle between two l.s. planes) 
 are estimated using the full covariance matrix.  The cell esds are taken 
 into account individually in the estimation of esds in distances, angles 
 and torsion angles; correlations between esds in cell parameters are only 
 used when they are defined by crystal symmetry.  An approximate (isotropic) 
 treatment of cell esds is used for estimating esds involving l.s. planes. 
; 
 
loop_ 
 _geom_bond_atom_site_label_1 
 _geom_bond_atom_site_label_2 
 _geom_bond_distance 
 _geom_bond_site_symmetry_2 
 _geom_bond_publ_flag 
Mo1 Mo2 2.1085(9) . y 
Mo1 N3 2.132(5) . y 
Mo1 N1 2.133(5) . y 
Mo1 N7 2.149(5) . y 
Mo1 N5 2.152(5) . y 
Mo2 N8 2.130(5) . y 
Mo2 N2 2.130(5) . y 
Mo2 N6 2.135(5) . y 
Mo2 N4 2.143(5) . y 
Mo3 Mo4 2.1107(9) . y 
Mo3 N9 2.128(5) . y 
Mo3 N15 2.135(5) . y 
Mo3 N13 2.137(5) . y 
Mo3 N11 2.148(5) . y 
Mo4 N10 2.122(5) . y 
Mo4 N16 2.133(5) . y 
Mo4 N12 2.141(5) . y 
Mo4 N14 2.155(5) . y 
N1 C1 1.346(7) . ? 
N1 C2 1.427(7) . ? 
N2 C1 1.362(7) . ? 
N2 C14 1.395(7) . ? 
N3 C30 1.327(8) . ? 
N3 C31 1.427(8) . ? 
N4 C30 1.312(8) . ? 
N4 C41 1.431(8) . ? 
N5 C50 1.328(8) . ? 
N5 C51 1.421(8) . ? 
N6 C50 1.318(8) . ? 
N6 C61 1.432(8) . ? 
N7 C70 1.329(8) . ? 
N7 C71 1.423(8) . ? 
N8 C70 1.312(8) . ? 
N8 C81 1.426(8) . ? 
N8 C81B 1.466(17) . ? 
N9 C8 1.359(7) . ? 
N9 C7 1.403(7) . ? 
N10 C8 1.358(7) . ? 
N10 C9 1.410(7) . ? 
N11 C110 1.319(8) . ? 
N11 C111 1.427(8) . ? 
N12 C110 1.319(8) . ? 
N12 C121 1.429(8) . ? 
N13 C130 1.318(8) . ? 
N13 C131 1.428(8) . ? 
N14 C130 1.324(8) . ? 
N14 C141 1.418(8) . ? 
N15 C150 1.314(8) . ? 
N15 C151 1.423(8) . ? 
N16 C150 1.327(8) . ? 
N16 C171 1.41(2) . ? 
N16 C161 1.463(14) . ? 
O3 C34 1.368(8) . ? 
O3 C37 1.407(9) . ? 
O4 C44 1.373(8) . ? 
O4 C47 1.419(9) . ? 
O5 C54 1.388(8) . ? 
O5 C57 1.425(10) . ? 
O6 C64 1.370(8) . ? 
O6 C67 1.400(10) . ? 
O7 C74 1.359(8) . ? 
O7 C77 1.422(9) . ? 
O11 C114 1.364(8) . ? 
O11 C117 1.415(9) . ? 
O12 C124 1.373(8) . ? 
O12 C127 1.411(9) . ? 
O13 C134 1.378(8) . ? 
O13 C137 1.410(9) . ? 
O14 C144 1.381(8) . ? 
O14 C147 1.434(8) . ? 
O15 C154 1.361(9) . ? 
O15 C157 1.416(10) . ? 
C1 C8 1.428(9) . ? 
C2 C7 1.384(8) . ? 
C2 C3 1.393(8) . ? 
C3 C4 1.379(9) . ? 
C4 C5 1.365(9) . ? 
C5 C6 1.381(9) . ? 
C6 C7 1.397(8) . ? 
C9 C14 1.387(8) . ? 
C9 C10 1.388(8) . ? 
C10 C11 1.385(9) . ? 
C11 C12 1.374(9) . ? 
C12 C13 1.386(9) . ? 
C13 C14 1.392(8) . ? 
C31 C32 1.383(9) . ? 
C31 C36 1.385(9) . ? 
C32 C33 1.394(9) . ? 
C33 C34 1.369(10) . ? 
C34 C35 1.370(9) . ? 
C35 C36 1.388(9) . ? 
C41 C46 1.377(9) . ? 
C41 C42 1.389(9) . ? 
C42 C43 1.381(9) . ? 
C43 C44 1.384(10) . ? 
C44 C45 1.376(10) . ? 
C45 C46 1.379(9) . ? 
C51 C56 1.383(9) . ? 
C51 C52 1.393(9) . ? 
C52 C53 1.383(9) . ? 
C53 C54 1.385(10) . ? 
C54 C55 1.359(10) . ? 
C55 C56 1.385(9) . ? 
C61 C66 1.380(9) . ? 
C61 C62 1.390(9) . ? 
C62 C63 1.381(9) . ? 
C63 C64 1.374(10) . ? 
C64 C65 1.383(10) . ? 
C65 C66 1.364(9) . ? 
C71 C76 1.371(9) . ? 
C71 C72 1.390(9) . ? 
C72 C73 1.382(10) . ? 
C73 C74 1.382(10) . ? 
C74 C75 1.362(10) . ? 
C75 C76 1.382(9) . ? 
C81 C82 1.3900 . ? 
C81 C86 1.3900 . ? 
C82 C83 1.3900 . ? 
C83 C84 1.3900 . ? 
C84 O8 1.362(10) . ? 
C84 C85 1.3900 . ? 
C85 C86 1.3900 . ? 
O8 C87 1.402(15) . ? 
C81B C82B 1.3900 . ? 
C81B C86B 1.3900 . ? 
C82B C83B 1.3900 . ? 
C83B C84B 1.3900 . ? 
C84B O8B 1.368(10) . ? 
C84B C85B 1.3900 . ? 
C85B C86B 1.3900 . ? 
O8B C87B 1.418(11) . ? 
C111 C116 1.377(9) . ? 
C111 C112 1.385(9) . ? 
C112 C113 1.370(9) . ? 
C113 C114 1.375(10) . ? 
C114 C115 1.377(10) . ? 
C115 C116 1.376(9) . ? 
C121 C126 1.379(9) . ? 
C121 C122 1.390(9) . ? 
C122 C123 1.366(10) . ? 
C123 C124 1.390(10) . ? 
C124 C125 1.382(10) . ? 
C125 C126 1.378(9) . ? 
C131 C132 1.383(9) . ? 
C131 C136 1.386(9) . ? 
C132 C133 1.386(9) . ? 
C133 C134 1.385(9) . ? 
C134 C135 1.359(10) . ? 
C135 C136 1.381(9) . ? 
C141 C146 1.368(9) . ? 
C141 C142 1.412(9) . ? 
C142 C143 1.367(9) . ? 
C143 C144 1.392(10) . ? 
C144 C145 1.368(10) . ? 
C145 C146 1.392(9) . ? 
C151 C152 1.368(9) . ? 
C151 C156 1.387(10) . ? 
C152 C153 1.376(10) . ? 
C153 C154 1.363(10) . ? 
C154 C155 1.398(10) . ? 
C155 C156 1.372(10) . ? 
C161 C162 1.3900 . ? 
C161 C166 1.3900 . ? 
C162 C163 1.3900 . ? 
C163 C164 1.3900 . ? 
C164 O16 1.371(8) . ? 
C164 C165 1.3900 . ? 
C165 C166 1.3900 . ? 
O16 C167 1.414(10) . ? 
C171 C172 1.3900 . ? 
C171 C176 1.3900 . ? 
C172 C173 1.3900 . ? 
C173 C174 1.3900 . ? 
C174 O16B 1.365(10) . ? 
C174 C175 1.3900 . ? 
C175 C176 1.3900 . ? 
O16B C177 1.418(10) . ? 
S O0 1.407(7) . ? 
S O1A 1.414(8) . ? 
S O1B 1.419(11) . ? 
S O2A 1.419(11) . ? 
S O2B 1.427(7) . ? 
S C15B 1.825(16) . ? 
S C15A 1.827(13) . ? 
F1A C15A 1.319(8) . ? 
F2A C15A 1.324(8) . ? 
F3A C15A 1.319(8) . ? 
F1B C15B 1.322(9) . ? 
F2B C15B 1.317(10) . ? 
F3B C15B 1.317(10) . ? 
Cl1 C1S 1.744(8) . ? 
C1S Cl2 1.733(8) . ? 
Cl3A C2SA 1.726(12) . ? 
C2SA Cl4A 1.695(11) . ? 
Cl5A C3SA 1.745(12) . ? 
C3SA Cl6A 1.717(12) . ? 
Cl5B C3SB 1.734(13) . ? 
C3SB Cl6B 1.737(13) . ? 
Cl7A C4SA 1.740(12) . ? 
C4SA Cl8A 1.731(12) . ? 
Cl7B C4SB 1.741(13) . ? 
C4SB Cl8B 1.741(13) . ? 
Cl7C C4SC 1.746(13) . ? 
C4SC Cl8C 1.741(13) . ? 
Cl9 C5S 1.720(10) . ? 
C5S Cl10 1.706(10) . ? 
Cl11 C6S 1.733(10) . ? 
C6S Cl12 1.723(10) . ? 
Cl13 C7S 1.752(9) . ? 
C7S Cl14 1.742(9) . ? 
Cl15 C8S 1.749(13) . ? 
C8S Cl16 1.735(13) . ? 
Cl17 C9S 1.727(12) . ? 
C9S Cl18 1.733(12) . ? 
 
loop_ 
 _geom_angle_atom_site_label_1 
 _geom_angle_atom_site_label_2 
 _geom_angle_atom_site_label_3 
 _geom_angle 
 _geom_angle_site_symmetry_1 
 _geom_angle_site_symmetry_3 
 _geom_angle_publ_flag 
Mo2 Mo1 N3 93.08(14) . . ? 
Mo2 Mo1 N1 91.94(13) . . ? 
N3 Mo1 N1 88.16(18) . . ? 
Mo2 Mo1 N7 92.18(14) . . ? 
N3 Mo1 N7 174.7(2) . . ? 
N1 Mo1 N7 91.85(19) . . ? 
Mo2 Mo1 N5 92.33(13) . . ? 
N3 Mo1 N5 89.55(19) . . ? 
N1 Mo1 N5 175.26(19) . . ? 
N7 Mo1 N5 90.05(19) . . ? 
Mo1 Mo2 N8 92.66(14) . . ? 
Mo1 Mo2 N2 93.27(13) . . ? 
N8 Mo2 N2 88.30(19) . . ? 
Mo1 Mo2 N6 92.83(14) . . ? 
N8 Mo2 N6 89.35(19) . . ? 
N2 Mo2 N6 173.56(19) . . ? 
Mo1 Mo2 N4 92.19(14) . . ? 
N8 Mo2 N4 175.06(19) . . ? 
N2 Mo2 N4 92.42(18) . . ? 
N6 Mo2 N4 89.43(18) . . ? 
Mo4 Mo3 N9 93.25(13) . . ? 
Mo4 Mo3 N15 91.89(15) . . ? 
N9 Mo3 N15 93.12(19) . . ? 
Mo4 Mo3 N13 91.67(14) . . ? 
N9 Mo3 N13 173.4(2) . . ? 
N15 Mo3 N13 91.1(2) . . ? 
Mo4 Mo3 N11 93.51(15) . . ? 
N9 Mo3 N11 86.95(19) . . ? 
N15 Mo3 N11 174.6(2) . . ? 
N13 Mo3 N11 88.3(2) . . ? 
Mo3 Mo4 N10 92.04(13) . . ? 
Mo3 Mo4 N16 93.00(15) . . ? 
N10 Mo4 N16 89.58(19) . . ? 
Mo3 Mo4 N12 91.75(14) . . ? 
N10 Mo4 N12 92.02(19) . . ? 
N16 Mo4 N12 174.9(2) . . ? 
Mo3 Mo4 N14 93.23(14) . . ? 
N10 Mo4 N14 174.68(19) . . ? 
N16 Mo4 N14 89.46(19) . . ? 
N12 Mo4 N14 88.51(19) . . ? 
C1 N1 C2 116.2(5) . . ? 
C1 N1 Mo1 119.7(4) . . ? 
C2 N1 Mo1 124.0(4) . . ? 
C1 N2 C14 117.5(5) . . ? 
C1 N2 Mo2 118.2(4) . . ? 
C14 N2 Mo2 124.3(4) . . ? 
C30 N3 C31 116.9(5) . . ? 
C30 N3 Mo1 116.2(4) . . ? 
C31 N3 Mo1 126.5(4) . . ? 
C30 N4 C41 116.1(5) . . ? 
C30 N4 Mo2 116.8(4) . . ? 
C41 N4 Mo2 125.9(4) . . ? 
C50 N5 C51 117.3(5) . . ? 
C50 N5 Mo1 116.6(4) . . ? 
C51 N5 Mo1 125.8(4) . . ? 
C50 N6 C61 119.1(5) . . ? 
C50 N6 Mo2 117.3(4) . . ? 
C61 N6 Mo2 122.6(4) . . ? 
C70 N7 C71 118.2(5) . . ? 
C70 N7 Mo1 117.0(4) . . ? 
C71 N7 Mo1 124.6(4) . . ? 
C70 N8 C81 116.5(7) . . ? 
C70 N8 C81B 119.1(17) . . ? 
C81 N8 C81B 6.8(18) . . ? 
C70 N8 Mo2 118.0(4) . . ? 
C81 N8 Mo2 123.6(7) . . ? 
C81B N8 Mo2 122.4(17) . . ? 
C8 N9 C7 116.8(5) . . ? 
C8 N9 Mo3 118.2(4) . . ? 
C7 N9 Mo3 124.7(4) . . ? 
C8 N10 C9 116.9(5) . . ? 
C8 N10 Mo4 119.5(4) . . ? 
C9 N10 Mo4 123.6(4) . . ? 
C110 N11 C111 117.0(6) . . ? 
C110 N11 Mo3 115.3(4) . . ? 
C111 N11 Mo3 126.5(4) . . ? 
C110 N12 C121 115.6(5) . . ? 
C110 N12 Mo4 117.3(4) . . ? 
C121 N12 Mo4 126.1(4) . . ? 
C130 N13 C131 117.5(5) . . ? 
C130 N13 Mo3 118.4(4) . . ? 
C131 N13 Mo3 123.1(4) . . ? 
C130 N14 C141 118.4(5) . . ? 
C130 N14 Mo4 115.9(4) . . ? 
C141 N14 Mo4 125.7(4) . . ? 
C150 N15 C151 117.9(6) . . ? 
C150 N15 Mo3 117.9(4) . . ? 
C151 N15 Mo3 123.7(4) . . ? 
C150 N16 C171 117.3(10) . . ? 
C150 N16 C161 118.4(7) . . ? 
C171 N16 C161 1.8(15) . . ? 
C150 N16 Mo4 116.7(4) . . ? 
C171 N16 Mo4 125.8(9) . . ? 
C161 N16 Mo4 124.6(6) . . ? 
C34 O3 C37 117.6(6) . . ? 
C44 O4 C47 117.2(6) . . ? 
C54 O5 C57 117.3(6) . . ? 
C64 O6 C67 117.3(6) . . ? 
C74 O7 C77 116.7(6) . . ? 
C114 O11 C117 117.5(6) . . ? 
C124 O12 C127 116.4(7) . . ? 
C134 O13 C137 118.9(6) . . ? 
C144 O14 C147 116.5(6) . . ? 
C154 O15 C157 116.1(7) . . ? 
N1 C1 N2 116.7(5) . . ? 
N1 C1 C8 122.3(5) . . ? 
N2 C1 C8 121.0(5) . . ? 
C7 C2 C3 120.0(6) . . ? 
C7 C2 N1 121.1(5) . . ? 
C3 C2 N1 118.9(5) . . ? 
C4 C3 C2 120.0(6) . . ? 
C5 C4 C3 120.3(6) . . ? 
C4 C5 C6 120.4(6) . . ? 
C5 C6 C7 120.2(6) . . ? 
C2 C7 C6 119.0(6) . . ? 
C2 C7 N9 121.6(5) . . ? 
C6 C7 N9 119.4(5) . . ? 
N10 C8 N9 116.7(5) . . ? 
N10 C8 C1 121.9(5) . . ? 
N9 C8 C1 121.5(5) . . ? 
C14 C9 C10 119.8(6) . . ? 
C14 C9 N10 121.2(5) . . ? 
C10 C9 N10 119.1(5) . . ? 
C11 C10 C9 120.3(6) . . ? 
C12 C11 C10 120.0(6) . . ? 
C11 C12 C13 120.1(6) . . ? 
C12 C13 C14 120.2(6) . . ? 
C9 C14 C13 119.5(6) . . ? 
C9 C14 N2 121.5(5) . . ? 
C13 C14 N2 119.0(5) . . ? 
N4 C30 N3 121.7(6) . . ? 
C32 C31 C36 117.7(6) . . ? 
C32 C31 N3 121.2(6) . . ? 
C36 C31 N3 121.0(6) . . ? 
C31 C32 C33 121.3(6) . . ? 
C34 C33 C32 119.7(7) . . ? 
O3 C34 C33 123.9(6) . . ? 
O3 C34 C35 116.0(6) . . ? 
C33 C34 C35 120.0(7) . . ? 
C34 C35 C36 120.2(7) . . ? 
C31 C36 C35 121.0(6) . . ? 
C46 C41 C42 118.6(6) . . ? 
C46 C41 N4 120.6(6) . . ? 
C42 C41 N4 120.7(6) . . ? 
C43 C42 C41 120.8(6) . . ? 
C42 C43 C44 119.6(7) . . ? 
O4 C44 C45 124.4(7) . . ? 
O4 C44 C43 115.5(6) . . ? 
C45 C44 C43 120.0(7) . . ? 
C44 C45 C46 119.8(6) . . ? 
C41 C46 C45 121.1(6) . . ? 
N6 C50 N5 120.9(6) . . ? 
C56 C51 C52 117.6(6) . . ? 
C56 C51 N5 123.4(6) . . ? 
C52 C51 N5 119.0(6) . . ? 
C53 C52 C51 121.3(7) . . ? 
C52 C53 C54 119.6(7) . . ? 
C55 C54 C53 119.9(7) . . ? 
C55 C54 O5 115.5(7) . . ? 
C53 C54 O5 124.7(7) . . ? 
C54 C55 C56 120.5(7) . . ? 
C51 C56 C55 121.1(7) . . ? 
C66 C61 C62 118.2(6) . . ? 
C66 C61 N6 122.9(6) . . ? 
C62 C61 N6 118.7(6) . . ? 
C63 C62 C61 120.4(6) . . ? 
C64 C63 C62 120.4(7) . . ? 
O6 C64 C63 125.0(7) . . ? 
O6 C64 C65 115.7(7) . . ? 
C63 C64 C65 119.3(7) . . ? 
C66 C65 C64 120.2(7) . . ? 
C65 C66 C61 121.4(7) . . ? 
N8 C70 N7 120.1(6) . . ? 
C76 C71 C72 117.5(6) . . ? 
C76 C71 N7 120.4(6) . . ? 
C72 C71 N7 122.1(6) . . ? 
C73 C72 C71 119.7(7) . . ? 
C72 C73 C74 122.1(7) . . ? 
O7 C74 C75 125.8(7) . . ? 
O7 C74 C73 116.2(7) . . ? 
C75 C74 C73 118.0(7) . . ? 
C74 C75 C76 120.3(7) . . ? 
C71 C76 C75 122.5(7) . . ? 
C82 C81 C86 120.0 . . ? 
C82 C81 N8 120.7(7) . . ? 
C86 C81 N8 119.2(7) . . ? 
C83 C82 C81 120.0 . . ? 
C82 C83 C84 120.0 . . ? 
O8 C84 C83 124.9(7) . . ? 
O8 C84 C85 114.9(7) . . ? 
C83 C84 C85 120.0 . . ? 
C86 C85 C84 120.0 . . ? 
C85 C86 C81 120.0 . . ? 
C84 O8 C87 117.1(10) . . ? 
C82B C81B C86B 120.0 . . ? 
C82B C81B N8 118(2) . . ? 
C86B C81B N8 122(2) . . ? 
C81B C82B C83B 120.0 . . ? 
C84B C83B C82B 120.0 . . ? 
O8B C84B C83B 115.6(19) . . ? 
O8B C84B C85B 124.2(19) . . ? 
C83B C84B C85B 120.0 . . ? 
C86B C85B C84B 120.0 . . ? 
C85B C86B C81B 120.0 . . ? 
C84B O8B C87B 122(3) . . ? 
N12 C110 N11 122.1(6) . . ? 
C116 C111 C112 117.7(6) . . ? 
C116 C111 N11 122.0(6) . . ? 
C112 C111 N11 120.2(6) . . ? 
C113 C112 C111 121.3(6) . . ? 
C112 C113 C114 120.1(7) . . ? 
O11 C114 C113 116.1(7) . . ? 
O11 C114 C115 124.6(7) . . ? 
C113 C114 C115 119.3(7) . . ? 
C116 C115 C114 120.0(7) . . ? 
C115 C116 C111 121.3(7) . . ? 
C126 C121 C122 118.9(6) . . ? 
C126 C121 N12 120.9(6) . . ? 
C122 C121 N12 120.0(6) . . ? 
C123 C122 C121 121.1(7) . . ? 
C122 C123 C124 118.9(7) . . ? 
O12 C124 C125 124.4(7) . . ? 
O12 C124 C123 114.6(7) . . ? 
C125 C124 C123 121.0(7) . . ? 
C126 C125 C124 118.9(7) . . ? 
C125 C126 C121 121.1(7) . . ? 
N13 C130 N14 120.6(6) . . ? 
C132 C131 C136 118.3(6) . . ? 
C132 C131 N13 119.1(6) . . ? 
C136 C131 N13 122.6(6) . . ? 
C131 C132 C133 121.5(6) . . ? 
C134 C133 C132 118.9(6) . . ? 
C135 C134 O13 116.2(6) . . ? 
C135 C134 C133 120.1(6) . . ? 
O13 C134 C133 123.7(7) . . ? 
C134 C135 C136 120.9(6) . . ? 
C135 C136 C131 120.3(6) . . ? 
C146 C141 C142 117.2(6) . . ? 
C146 C141 N14 124.8(6) . . ? 
C142 C141 N14 118.0(6) . . ? 
C143 C142 C141 120.9(6) . . ? 
C142 C143 C144 121.0(7) . . ? 
C145 C144 O14 126.1(6) . . ? 
C145 C144 C143 118.5(7) . . ? 
O14 C144 C143 115.4(7) . . ? 
C144 C145 C146 120.5(6) . . ? 
C141 C146 C145 121.9(7) . . ? 
N15 C150 N16 120.5(6) . . ? 
C152 C151 C156 118.2(6) . . ? 
C152 C151 N15 119.8(6) . . ? 
C156 C151 N15 122.0(6) . . ? 
C151 C152 C153 121.5(7) . . ? 
C154 C153 C152 120.6(7) . . ? 
O15 C154 C153 126.2(7) . . ? 
O15 C154 C155 115.3(7) . . ? 
C153 C154 C155 118.6(7) . . ? 
C156 C155 C154 120.4(7) . . ? 
C155 C156 C151 120.6(7) . . ? 
C162 C161 C166 120.0 . . ? 
C162 C161 N16 118.0(12) . . ? 
C166 C161 N16 121.9(12) . . ? 
C163 C162 C161 120.0 . . ? 
C162 C163 C164 120.0 . . ? 
O16 C164 C163 126.8(13) . . ? 
O16 C164 C165 113.1(13) . . ? 
C163 C164 C165 120.0 . . ? 
C166 C165 C164 120.0 . . ? 
C165 C166 C161 120.0 . . ? 
C164 O16 C167 121(4) . . ? 
C172 C171 C176 120.0 . . ? 
C172 C171 N16 123.9(17) . . ? 
C176 C171 N16 116.0(17) . . ? 
C171 C172 C173 120.0 . . ? 
C174 C173 C172 120.0 . . ? 
O16B C174 C173 123.1(18) . . ? 
O16B C174 C175 116.9(18) . . ? 
C173 C174 C175 120.0 . . ? 
C176 C175 C174 120.0 . . ? 
C175 C176 C171 120.0 . . ? 
C174 O16B C177 113(6) . . ? 
O0 S O1A 114.1(7) . . ? 
O0 S O1B 130(5) . . ? 
O1A S O1B 33(4) . . ? 
O0 S O2A 128(4) . . ? 
O1A S O2A 88(5) . . ? 
O1B S O2A 56(8) . . ? 
O0 S O2B 113.5(7) . . ? 
O1A S O2B 120.8(16) . . ? 
O1B S O2B 89(5) . . ? 
O2A S O2B 34(4) . . ? 
O0 S C15B 104.8(8) . . ? 
O1A S C15B 113.9(11) . . ? 
O1B S C15B 122(5) . . ? 
O2A S C15B 107(5) . . ? 
O2B S C15B 85.1(11) . . ? 
O0 S C15A 101.8(5) . . ? 
O1A S C15A 97.6(9) . . ? 
O1B S C15A 115(6) . . ? 
O2A S C15A 122(4) . . ? 
O2B S C15A 105.2(8) . . ? 
C15B S C15A 21.0(8) . . ? 
F1A C15A F3A 108.0(9) . . ? 
F1A C15A F2A 108.5(9) . . ? 
F3A C15A F2A 108.4(8) . . ? 
F1A C15A S 111.5(10) . . ? 
F3A C15A S 111.8(9) . . ? 
F2A C15A S 108.5(8) . . ? 
F2B C15B F3B 111.1(13) . . ? 
F2B C15B F1B 110.7(13) . . ? 
F3B C15B F1B 110.7(14) . . ? 
F2B C15B S 112(3) . . ? 
F3B C15B S 108(3) . . ? 
F1B C15B S 103.8(19) . . ? 
Cl2 C1S Cl1 111.0(5) . . ? 
Cl4A C2SA Cl3A 114.6(10) . . ? 
Cl6A C3SA Cl5A 125.5(17) . . ? 
Cl5B C3SB Cl6B 102.6(10) . . ? 
Cl8A C4SA Cl7A 119.1(12) . . ? 
Cl8B C4SB Cl7B 117(2) . . ? 
Cl8C C4SC Cl7C 117(2) . . ? 
Cl10 C5S Cl9 116.2(8) . . ? 
Cl12 C6S Cl11 116.1(7) . . ? 
Cl14 C7S Cl13 111.5(6) . . ? 
Cl16 C8S Cl15 108.7(12) . . ? 
Cl17 C9S Cl18 111.0(10) . . ? 
 
_diffrn_measured_fraction_theta_max    0.996 
_diffrn_reflns_theta_full              22.50 
_diffrn_measured_fraction_theta_full   0.996 
_refine_diff_density_max    2.130 
_refine_diff_density_min   -0.605 
_refine_diff_density_rms    0.123 

===========the end of compound 2b============

==========compound 3=========================
 
data_xl 
 
_audit_creation_method            SHELXL-97 
_chemical_name_systematic 
; 
 ? 
; 
_chemical_name_common             '[Mo2(DAniF)3]2C14H8N4(PF6)2,4CH2Cl2' 
_chemical_melting_point           ? 
_chemical_formula_moiety      '[Mo2(C15H15N2O2)3]2C14H8N4(PF6)2,4CH2Cl2'
_chemical_formula_sum 
 'C108 H106 Cl8 F12 Mo4 N16 O12 P2' 
_chemical_formula_weight          2777.39 
 
loop_ 
 _atom_type_symbol 
 _atom_type_description 
 _atom_type_scat_dispersion_real 
 _atom_type_scat_dispersion_imag 
 _atom_type_scat_source 
 'C'  'C'   0.0033   0.0016 
 'International Tables Vol C Tables 4.2.6.8 and 6.1.1.4' 
 'H'  'H'   0.0000   0.0000 
 'International Tables Vol C Tables 4.2.6.8 and 6.1.1.4' 
 'N'  'N'   0.0061   0.0033 
 'International Tables Vol C Tables 4.2.6.8 and 6.1.1.4' 
 'O'  'O'   0.0106   0.0060 
 'International Tables Vol C Tables 4.2.6.8 and 6.1.1.4' 
 'F'  'F'   0.0171   0.0103 
 'International Tables Vol C Tables 4.2.6.8 and 6.1.1.4' 
 'P'  'P'   0.1023   0.0942 
 'International Tables Vol C Tables 4.2.6.8 and 6.1.1.4' 
 'Mo'  'Mo'  -1.6832   0.6857 
 'International Tables Vol C Tables 4.2.6.8 and 6.1.1.4' 
 'Cl'  'Cl'   0.1484   0.1585 
 'International Tables Vol C Tables 4.2.6.8 and 6.1.1.4' 
 
_symmetry_cell_setting            triclinic
_symmetry_space_group_name_H-M    'P -1'
 
loop_ 
 _symmetry_equiv_pos_as_xyz 
 'x, y, z' 
 '-x, -y, -z' 
 
_cell_length_a                    12.3360(15) 
_cell_length_b                    16.948(2) 
_cell_length_c                    17.203(2) 
_cell_angle_alpha                 60.865(2) 
_cell_angle_beta                  81.414(2) 
_cell_angle_gamma                 70.215(2) 
_cell_volume                      2955.7(6) 
_cell_formula_units_Z             1 
_cell_measurement_temperature     213(2) 
_cell_measurement_reflns_used     10617 
_cell_measurement_theta_min       2.197 
_cell_measurement_theta_max       25.323 
 
_exptl_crystal_description        block
_exptl_crystal_colour             black 
_exptl_crystal_size_max           0.33
_exptl_crystal_size_mid           0.12 
_exptl_crystal_size_min           0.04 
_exptl_crystal_density_meas       ? 
_exptl_crystal_density_diffrn     1.560 
_exptl_crystal_density_method     'not measured' 
_exptl_crystal_F_000              1404 
_exptl_absorpt_coefficient_mu     0.706 
_exptl_absorpt_correction_type    'multi-scan' 
_exptl_absorpt_correction_T_min   0.8004
_exptl_absorpt_correction_T_max   0.9723 
_exptl_absorpt_process_details    SADABS 
 
_exptl_special_details 
; 
 ? 
; 
 
_diffrn_ambient_temperature       213(2) 
_diffrn_radiation_wavelength      0.71073 
_diffrn_radiation_type            MoK\a 
_diffrn_radiation_source          'normal-focus sealed tube' 
_diffrn_radiation_monochromator   graphite 
_diffrn_measurement_device_type   'BRUKER SMART 1000' 
_diffrn_measurement_method        '\w-scans' 
_diffrn_detector_area_resol_mean  ? 
_diffrn_standards_number          'None (area detector data)' 
_diffrn_standards_interval_count  ? 
_diffrn_standards_interval_time   ? 
_diffrn_standards_decay_%         ? 
_diffrn_reflns_number             17471 
_diffrn_reflns_av_R_equivalents   0.0280 
_diffrn_reflns_av_sigmaI/netI     0.0516 
_diffrn_reflns_limit_h_min        -14 
_diffrn_reflns_limit_h_max        11 
_diffrn_reflns_limit_k_min        -20 
_diffrn_reflns_limit_k_max        19 
_diffrn_reflns_limit_l_min        -20 
_diffrn_reflns_limit_l_max        20 
_diffrn_reflns_theta_min          1.75 
_diffrn_reflns_theta_max          25.32 
_reflns_number_total              10617 
_reflns_number_gt                 7963 
_reflns_threshold_expression      >2sigma(I) 
 
_computing_data_collection        SMART 
_computing_cell_refinement        SAINT 
_computing_data_reduction         SAINT
_computing_structure_solution     'SHELXS-97 (Sheldrick, 1990)' 
_computing_structure_refinement   'SHELXL-97 (Sheldrick, 1997)' 
_computing_molecular_graphics     XP
_computing_publication_material   CIFTAB
 
_refine_special_details 
; 
 Refinement of F^2^ against ALL reflections.  The weighted R-factor wR and 
 goodness of fit S are based on F^2^, conventional R-factors R are based 
 on F, with F set to zero for negative F^2^. The threshold expression of 
 F^2^ > 2sigma(F^2^) is used only for calculating R-factors(gt) etc. and is 
 not relevant to the choice of reflections for refinement.  R-factors based 
 on F^2^ are statistically about twice as large as those based on F, and R- 
 factors based on ALL data will be even larger. 
; 
 
_refine_ls_structure_factor_coef  Fsqd  
_refine_ls_matrix_type            full 
_refine_ls_weighting_scheme       calc  
_refine_ls_weighting_details 
 'calc w=1/[\s^2^(Fo^2^)+(0.0410P)^2^+3.2792P] where P=(Fo^2^+2Fc^2^)/3' 
_atom_sites_solution_primary      direct 
_atom_sites_solution_secondary    difmap 
_atom_sites_solution_hydrogens    geom 
_refine_ls_hydrogen_treatment     noref 
_refine_ls_extinction_method      none 
_refine_ls_extinction_coef        ? 
_refine_ls_number_reflns          10617 
_refine_ls_number_parameters      788 
_refine_ls_number_restraints      44 
_refine_ls_R_factor_all           0.0626 
_refine_ls_R_factor_gt            0.0412 
_refine_ls_wR_factor_ref          0.1069 
_refine_ls_wR_factor_gt           0.0953 
_refine_ls_goodness_of_fit_ref    1.052 
_refine_ls_restrained_S_all       1.053 
_refine_ls_shift/su_max           0.004 
_refine_ls_shift/su_mean          0.000 
 
loop_ 
 _atom_site_label 
 _atom_site_type_symbol 
 _atom_site_fract_x 
 _atom_site_fract_y 
 _atom_site_fract_z 
 _atom_site_U_iso_or_equiv 
 _atom_site_adp_type 
 _atom_site_occupancy 
 _atom_site_symmetry_multiplicity 
 _atom_site_calc_flag 
 _atom_site_refinement_flags 
 _atom_site_disorder_assembly 
 _atom_site_disorder_group 
Mo1 Mo -0.06247(3) 0.18465(2) 0.26454(2) 0.02325(9) Uani 1 1 d . . . 
Mo2 Mo 0.06134(3) 0.06219(2) 0.26385(2) 0.02368(9) Uani 1 1 d . . . 
N1 N -0.0719(3) 0.1143(2) 0.40682(18) 0.0243(7) Uani 1 1 d . . . 
N2 N 0.0680(3) -0.0158(2) 0.40451(18) 0.0232(7) Uani 1 1 d . . . 
N3 N -0.2067(3) 0.1439(2) 0.2590(2) 0.0287(7) Uani 1 1 d . . . 
N4 N -0.0705(3) 0.0157(2) 0.2515(2) 0.0285(7) Uani 1 1 d . . . 
N5 N -0.0686(3) 0.2606(2) 0.12299(19) 0.0279(7) Uani 1 1 d . . . 
N6 N 0.0745(3) 0.1311(2) 0.1235(2) 0.0289(7) Uani 1 1 d . . . 
N7 N 0.0689(3) 0.2372(2) 0.2670(2) 0.0281(7) Uani 1 1 d . . . 
N8 N 0.2035(3) 0.1021(2) 0.2737(2) 0.0296(7) Uani 1 1 d . . . 
O3 O -0.6615(3) 0.3086(2) 0.3244(2) 0.0539(9) Uani 1 1 d . . . 
O4 O 0.0844(3) -0.2579(2) 0.1361(2) 0.0520(8) Uani 1 1 d . . . 
O5 O -0.4276(3) 0.5874(2) -0.0648(2) 0.0584(9) Uani 1 1 d . . . 
O6 O 0.4185(3) -0.0235(2) -0.0571(2) 0.0719(11) Uani 1 1 d . . . 
O7 O -0.0678(3) 0.6248(2) 0.1568(2) 0.0518(8) Uani 1 1 d . . . 
O8 O 0.6487(3) -0.1523(3) 0.3620(2) 0.0657(10) Uani 1 1 d . . . 
C1 C -0.0012(3) 0.0254(2) 0.4519(2) 0.0229(8) Uani 1 1 d . . . 
C2 C -0.1485(3) 0.1554(2) 0.4560(2) 0.0243(8) Uani 1 1 d . . . 
C3 C -0.2275(3) 0.2458(3) 0.4117(2) 0.0305(9) Uani 1 1 d . . . 
H3A H -0.2293 0.2783 0.3498 0.037 Uiso 1 1 calc R . . 
C4 C -0.3027(4) 0.2873(3) 0.4586(3) 0.0370(10) Uani 1 1 d . . . 
H4A H -0.3548 0.3476 0.4283 0.044 Uiso 1 1 calc R . . 
C5 C 0.1461(3) -0.1075(2) 0.4515(2) 0.0244(8) Uani 1 1 d . . . 
C6 C 0.2240(3) -0.1505(3) 0.4050(3) 0.0307(9) Uani 1 1 d . . . 
H6A H 0.2237 -0.1182 0.3431 0.037 Uiso 1 1 calc R . . 
C7 C 0.3013(4) -0.2398(3) 0.4494(3) 0.0358(10) Uani 1 1 d . . . 
H7A H 0.3520 -0.2680 0.4178 0.043 Uiso 1 1 calc R . . 
C30 C -0.1798(3) 0.0663(3) 0.2499(3) 0.0323(9) Uani 1 1 d . . . 
H30A H -0.2380 0.0472 0.2422 0.039 Uiso 1 1 calc R . . 
C31 C -0.3241(3) 0.1862(3) 0.2729(2) 0.0292(9) Uani 1 1 d . . . 
C32 C -0.3950(4) 0.1322(3) 0.3257(3) 0.0394(10) Uani 1 1 d . . . 
H32A H -0.3671 0.0664 0.3511 0.047 Uiso 1 1 calc R . . 
C33 C -0.5073(4) 0.1758(3) 0.3409(3) 0.0443(11) Uani 1 1 d . . . 
H33A H -0.5548 0.1392 0.3753 0.053 Uiso 1 1 calc R . . 
C34 C -0.5490(4) 0.2732(3) 0.3055(3) 0.0377(10) Uani 1 1 d . . . 
C35 C -0.4795(3) 0.3281(3) 0.2540(3) 0.0349(9) Uani 1 1 d . . . 
H35A H -0.5066 0.3937 0.2310 0.042 Uiso 1 1 calc R . . 
C36 C -0.3683(3) 0.2839(3) 0.2370(3) 0.0342(9) Uani 1 1 d . . . 
H36A H -0.3222 0.3210 0.2005 0.041 Uiso 1 1 calc R . . 
C37 C -0.7074(4) 0.4081(3) 0.2895(3) 0.0559(13) Uani 1 1 d . . . 
H37A H -0.7866 0.4243 0.3062 0.084 Uiso 1 1 calc R . . 
H37B H -0.7028 0.4379 0.2258 0.084 Uiso 1 1 calc R . . 
H37C H -0.6642 0.4298 0.3128 0.084 Uiso 1 1 calc R . . 
C41 C -0.0434(3) -0.0576(3) 0.2255(3) 0.0302(9) Uani 1 1 d . . . 
C42 C 0.0265(4) -0.1469(3) 0.2819(3) 0.0335(9) Uani 1 1 d . . . 
H42A H 0.0444 -0.1606 0.3386 0.040 Uiso 1 1 calc R . . 
C43 C 0.0704(4) -0.2165(3) 0.2545(3) 0.0391(10) Uani 1 1 d . . . 
H43A H 0.1174 -0.2765 0.2926 0.047 Uiso 1 1 calc R . . 
C44 C 0.0432(4) -0.1955(3) 0.1705(3) 0.0378(10) Uani 1 1 d . . . 
C45 C -0.0307(4) -0.1080(3) 0.1156(3) 0.0419(11) Uani 1 1 d . . . 
H45A H -0.0520 -0.0955 0.0602 0.050 Uiso 1 1 calc R . . 
C46 C -0.0734(4) -0.0383(3) 0.1428(3) 0.0392(10) Uani 1 1 d . . . 
H46A H -0.1220 0.0211 0.1052 0.047 Uiso 1 1 calc R . . 
C47 C 0.1580(5) -0.3493(3) 0.1934(4) 0.0601(14) Uani 1 1 d . . . 
H47A H 0.1817 -0.3873 0.1633 0.090 Uiso 1 1 calc R . . 
H47B H 0.1173 -0.3794 0.2461 0.090 Uiso 1 1 calc R . . 
H47C H 0.2246 -0.3429 0.2095 0.090 Uiso 1 1 calc R . . 
C50 C 0.0019(3) 0.2176(3) 0.0791(2) 0.0318(9) Uani 1 1 d . . . 
H50A H 0.0002 0.2482 0.0172 0.038 Uiso 1 1 calc R . . 
C51 C -0.1589(3) 0.3451(3) 0.0745(2) 0.0284(9) Uani 1 1 d . . . 
C52 C -0.2300(4) 0.3497(3) 0.0159(3) 0.0352(9) Uani 1 1 d . . . 
H52A H -0.2178 0.2975 0.0070 0.042 Uiso 1 1 calc R . . 
C53 C -0.3191(4) 0.4319(3) -0.0291(3) 0.0395(10) Uani 1 1 d . . . 
H53A H -0.3662 0.4349 -0.0685 0.047 Uiso 1 1 calc R . . 
C54 C -0.3382(4) 0.5098(3) -0.0159(3) 0.0386(10) Uani 1 1 d . . . 
C55 C -0.2709(4) 0.5050(3) 0.0443(3) 0.0384(10) Uani 1 1 d . . . 
H55A H -0.2855 0.5564 0.0549 0.046 Uiso 1 1 calc R . . 
C56 C -0.1814(4) 0.4232(3) 0.0889(3) 0.0343(9) Uani 1 1 d . . . 
H56A H -0.1356 0.4202 0.1292 0.041 Uiso 1 1 calc R . . 
C57 C -0.4458(5) 0.6720(3) -0.0592(4) 0.0699(17) Uani 1 1 d . . . 
H57A H -0.5102 0.7209 -0.0968 0.105 Uiso 1 1 calc R . . 
H57B H -0.3781 0.6920 -0.0784 0.105 Uiso 1 1 calc R . . 
H57C H -0.4614 0.6602 0.0012 0.105 Uiso 1 1 calc R . . 
C61 C 0.1618(3) 0.0924(3) 0.0763(2) 0.0312(9) Uani 1 1 d . . . 
C62 C 0.2200(4) 0.1473(3) 0.0062(3) 0.0383(10) Uani 1 1 d . . . 
H62A H 0.2014 0.2119 -0.0121 0.046 Uiso 1 1 calc R . . 
C63 C 0.3057(4) 0.1054(3) -0.0362(3) 0.0481(12) Uani 1 1 d . . . 
H63A H 0.3442 0.1422 -0.0834 0.058 Uiso 1 1 calc R . . 
C64 C 0.3345(4) 0.0095(3) -0.0089(3) 0.0474(12) Uani 1 1 d . . . 
C65 C 0.2803(4) -0.0460(3) 0.0618(3) 0.0410(10) Uani 1 1 d . . . 
H65A H 0.3004 -0.1108 0.0809 0.049 Uiso 1 1 calc R . . 
C66 C 0.1956(4) -0.0039(3) 0.1039(3) 0.0362(10) Uani 1 1 d . . . 
H66A H 0.1599 -0.0417 0.1526 0.043 Uiso 1 1 calc R . . 
C67 C 0.4434(6) -0.1206(4) -0.0368(4) 0.087(2) Uani 1 1 d . . . 
H67A H 0.5038 -0.1355 -0.0742 0.131 Uiso 1 1 calc R . . 
H67B H 0.3755 -0.1302 -0.0469 0.131 Uiso 1 1 calc R . . 
H67C H 0.4676 -0.1612 0.0245 0.131 Uiso 1 1 calc R . . 
C70 C 0.1784(3) 0.1846(3) 0.2716(3) 0.0315(9) Uani 1 1 d . . . 
H70A H 0.2372 0.2065 0.2734 0.038 Uiso 1 1 calc R . . 
C71 C 0.0436(3) 0.3347(3) 0.2446(3) 0.0295(9) Uani 1 1 d . . . 
C72 C -0.0345(4) 0.3706(3) 0.2950(3) 0.0352(9) Uani 1 1 d . . . 
H72A H -0.0613 0.3294 0.3476 0.042 Uiso 1 1 calc R . . 
C73 C -0.0729(4) 0.4670(3) 0.2681(3) 0.0379(10) Uani 1 1 d . . . 
H73A H -0.1254 0.4904 0.3023 0.045 Uiso 1 1 calc R . . 
C74 C -0.0334(4) 0.5281(3) 0.1905(3) 0.0376(10) Uani 1 1 d . . . 
C75 C 0.0468(4) 0.4925(3) 0.1405(3) 0.0411(10) Uani 1 1 d . . . 
H75A H 0.0750 0.5336 0.0889 0.049 Uiso 1 1 calc R . . 
C76 C 0.0847(4) 0.3967(3) 0.1671(3) 0.0350(9) Uani 1 1 d . . . 
H76A H 0.1379 0.3733 0.1331 0.042 Uiso 1 1 calc R . . 
C77 C -0.1387(4) 0.6608(3) 0.2132(4) 0.0579(14) Uani 1 1 d . . . 
H77A H -0.1576 0.7287 0.1841 0.087 Uiso 1 1 calc R . . 
H77B H -0.0980 0.6343 0.2681 0.087 Uiso 1 1 calc R . . 
H77C H -0.2083 0.6436 0.2254 0.087 Uiso 1 1 calc R . . 
C81 C 0.3202(3) 0.0392(3) 0.2946(3) 0.0310(9) Uani 1 1 d . . . 
C82 C 0.3821(4) 0.0106(3) 0.2347(3) 0.0449(11) Uani 1 1 d . . . 
H82A H 0.3499 0.0352 0.1789 0.054 Uiso 1 1 calc R . . 
C83 C 0.4911(4) -0.0540(4) 0.2555(3) 0.0514(13) Uani 1 1 d . . . 
H83A H 0.5317 -0.0728 0.2141 0.062 Uiso 1 1 calc R . . 
C84 C 0.5393(4) -0.0900(3) 0.3369(3) 0.0431(11) Uani 1 1 d . . . 
C85 C 0.4777(4) -0.0645(3) 0.3992(3) 0.0456(11) Uani 1 1 d . . . 
H85A H 0.5099 -0.0904 0.4553 0.055 Uiso 1 1 calc R . . 
C86 C 0.3677(4) -0.0002(3) 0.3781(3) 0.0399(10) Uani 1 1 d . . . 
H86A H 0.3258 0.0166 0.4204 0.048 Uiso 1 1 calc R . . 
C87 C 0.7110(5) -0.1859(5) 0.3016(4) 0.0773(18) Uani 1 1 d . . . 
H87A H 0.7863 -0.2276 0.3262 0.116 Uiso 1 1 calc R . . 
H87B H 0.7184 -0.1330 0.2460 0.116 Uiso 1 1 calc R . . 
H87C H 0.6704 -0.2198 0.2919 0.116 Uiso 1 1 calc R . . 
P1 P 0.5261(12) 0.6146(10) 0.2289(8) 0.0752(14) Uani 0.438(19) 1 d PD A 1 
F1 F 0.5984(13) 0.6661(11) 0.1500(8) 0.112(7) Uani 0.438(19) 1 d PD A 1 
F2 F 0.4244(17) 0.7068(14) 0.199(3) 0.207(15) Uani 0.438(19) 1 d PD A 1 
F3 F 0.6292(13) 0.5230(12) 0.255(2) 0.194(13) Uani 0.438(19) 1 d PD A 1 
F4 F 0.4763(15) 0.5877(16) 0.1725(11) 0.129(8) Uani 0.438(19) 1 d PD A 1 
F5 F 0.454(2) 0.5610(19) 0.3022(10) 0.151(9) Uani 0.438(19) 1 d PD A 1 
F6 F 0.574(2) 0.642(3) 0.2866(15) 0.184(13) Uani 0.438(19) 1 d PD A 1 
P1A P 0.5104(9) 0.6322(7) 0.2298(6) 0.0752(14) Uani 0.562(19) 1 d PD A 2 
F1A F 0.6028(12) 0.6318(14) 0.1584(10) 0.165(8) Uani 0.562(19) 1 d PD A 2 
F2A F 0.4864(17) 0.5493(10) 0.233(2) 0.236(12) Uani 0.562(19) 1 d PD A 2 
F3A F 0.6083(14) 0.5663(15) 0.3003(8) 0.167(8) Uani 0.562(19) 1 d PD A 2 
F4A F 0.4181(11) 0.6963(12) 0.1555(9) 0.140(8) Uani 0.562(19) 1 d PD A 2 
F5A F 0.4230(14) 0.633(2) 0.3006(11) 0.187(8) Uani 0.562(19) 1 d PD A 2 
F6A F 0.5309(16) 0.7199(11) 0.2214(17) 0.173(7) Uani 0.562(19) 1 d PD A 2 
Cl1 Cl 0.15847(15) 0.12004(12) 0.52107(11) 0.0788(4) Uani 1 1 d . . . 
C1S C 0.1730(5) 0.2317(4) 0.4800(4) 0.0623(14) Uani 1 1 d . . . 
H1SA H 0.1791 0.2596 0.4158 0.075 Uiso 1 1 calc R . . 
H1SB H 0.2438 0.2253 0.5038 0.075 Uiso 1 1 calc R . . 
Cl2 Cl 0.05773(16) 0.30833(12) 0.50689(10) 0.0861(5) Uani 1 1 d . . . 
Cl3 Cl 0.3866(2) -0.62941(17) 0.50770(16) 0.1298(8) Uani 1 1 d . . . 
C2S C 0.3364(7) -0.5151(6) 0.4949(5) 0.111(3) Uani 1 1 d . . . 
H2SA H 0.3614 -0.5147 0.5455 0.133 Uiso 1 1 calc R . . 
H2SB H 0.3686 -0.4737 0.4417 0.133 Uiso 1 1 calc R . . 
Cl4 Cl 0.1902(3) -0.4735(2) 0.4866(2) 0.2022(16) Uani 1 1 d . . . 
 
loop_ 
 _atom_site_aniso_label 
 _atom_site_aniso_U_11 
 _atom_site_aniso_U_22 
 _atom_site_aniso_U_33 
 _atom_site_aniso_U_23 
 _atom_site_aniso_U_13 
 _atom_site_aniso_U_12 
Mo1 0.02705(19) 0.01828(17) 0.02093(17) -0.00888(14) -0.00052(13) -0.00301(14) 
Mo2 0.02773(19) 0.01932(17) 0.02080(17) -0.00973(14) 0.00016(13) -0.00294(14) 
N1 0.0307(18) 0.0193(16) 0.0192(15) -0.0085(13) -0.0018(13) -0.0032(14) 
N2 0.0267(17) 0.0196(16) 0.0213(15) -0.0109(13) -0.0001(13) -0.0027(13) 
N3 0.0301(18) 0.0249(17) 0.0295(17) -0.0132(14) -0.0014(14) -0.0051(14) 
N4 0.0318(19) 0.0253(17) 0.0327(17) -0.0185(15) 0.0018(15) -0.0068(15) 
N5 0.0328(18) 0.0220(17) 0.0214(16) -0.0074(14) -0.0026(14) -0.0027(14) 
N6 0.0324(19) 0.0249(17) 0.0240(16) -0.0112(14) 0.0009(14) -0.0031(15) 
N7 0.0301(18) 0.0231(17) 0.0306(17) -0.0118(14) -0.0004(14) -0.0084(14) 
N8 0.0263(18) 0.0291(18) 0.0317(17) -0.0144(15) -0.0015(14) -0.0054(14) 
O3 0.0322(17) 0.0441(19) 0.073(2) -0.0246(18) 0.0111(16) -0.0065(15) 
O4 0.066(2) 0.0418(19) 0.0546(19) -0.0351(16) -0.0019(17) -0.0031(17) 
O5 0.058(2) 0.0421(19) 0.064(2) -0.0286(17) -0.0314(18) 0.0175(16) 
O6 0.084(3) 0.048(2) 0.069(2) -0.0327(19) 0.040(2) -0.012(2) 
O7 0.059(2) 0.0230(16) 0.062(2) -0.0167(15) 0.0045(17) -0.0056(15) 
O8 0.039(2) 0.078(3) 0.077(2) -0.053(2) -0.0173(18) 0.0185(18) 
C1 0.027(2) 0.0195(19) 0.0230(18) -0.0101(16) 0.0004(16) -0.0072(16) 
C2 0.027(2) 0.0197(19) 0.0263(19) -0.0123(16) -0.0004(16) -0.0047(16) 
C3 0.038(2) 0.021(2) 0.0233(19) -0.0075(16) -0.0029(17) -0.0018(17) 
C4 0.034(2) 0.028(2) 0.037(2) -0.0138(19) -0.0039(19) 0.0042(18) 
C5 0.028(2) 0.0195(19) 0.0239(18) -0.0098(16) -0.0032(16) -0.0046(16) 
C6 0.040(2) 0.024(2) 0.026(2) -0.0138(17) 0.0026(18) -0.0054(18) 
C7 0.034(2) 0.030(2) 0.041(2) -0.023(2) 0.0035(19) 0.0009(18) 
C30 0.031(2) 0.035(2) 0.037(2) -0.0215(19) 0.0014(18) -0.0114(19) 
C31 0.025(2) 0.033(2) 0.032(2) -0.0184(18) -0.0012(17) -0.0062(17) 
C32 0.036(2) 0.025(2) 0.052(3) -0.017(2) 0.003(2) -0.0059(19) 
C33 0.037(3) 0.039(3) 0.056(3) -0.019(2) 0.008(2) -0.018(2) 
C34 0.029(2) 0.036(2) 0.047(3) -0.022(2) 0.0027(19) -0.0048(19) 
C35 0.031(2) 0.031(2) 0.039(2) -0.0162(19) -0.0015(19) -0.0044(18) 
C36 0.032(2) 0.034(2) 0.034(2) -0.0137(19) 0.0020(18) -0.0110(19) 
C37 0.038(3) 0.045(3) 0.069(3) -0.026(3) 0.006(2) 0.001(2) 
C41 0.030(2) 0.029(2) 0.037(2) -0.0193(19) 0.0033(18) -0.0106(18) 
C42 0.044(3) 0.033(2) 0.030(2) -0.0185(19) 0.0014(19) -0.014(2) 
C43 0.047(3) 0.028(2) 0.041(2) -0.016(2) -0.005(2) -0.008(2) 
C44 0.043(3) 0.037(2) 0.045(2) -0.029(2) 0.002(2) -0.012(2) 
C45 0.049(3) 0.040(3) 0.040(2) -0.023(2) -0.010(2) -0.007(2) 
C46 0.041(3) 0.036(2) 0.041(2) -0.020(2) -0.009(2) -0.005(2) 
C47 0.069(4) 0.046(3) 0.070(3) -0.043(3) -0.006(3) 0.005(3) 
C50 0.038(2) 0.030(2) 0.0203(19) -0.0088(17) 0.0010(17) -0.0062(19) 
C51 0.028(2) 0.028(2) 0.0196(18) -0.0080(16) 0.0026(16) -0.0023(17) 
C52 0.040(2) 0.030(2) 0.034(2) -0.0165(19) -0.0037(19) -0.0046(19) 
C53 0.038(2) 0.044(3) 0.038(2) -0.023(2) -0.008(2) -0.006(2) 
C54 0.038(2) 0.035(2) 0.035(2) -0.016(2) -0.0063(19) 0.001(2) 
C55 0.043(3) 0.028(2) 0.039(2) -0.0178(19) -0.003(2) 0.0004(19) 
C56 0.037(2) 0.035(2) 0.032(2) -0.0186(19) -0.0046(18) -0.0059(19) 
C57 0.076(4) 0.040(3) 0.076(4) -0.030(3) -0.033(3) 0.023(3) 
C61 0.033(2) 0.036(2) 0.0227(19) -0.0144(18) -0.0007(17) -0.0055(18) 
C62 0.043(3) 0.029(2) 0.036(2) -0.0145(19) 0.005(2) -0.0057(19) 
C63 0.054(3) 0.040(3) 0.039(2) -0.015(2) 0.018(2) -0.015(2) 
C64 0.051(3) 0.044(3) 0.039(2) -0.022(2) 0.014(2) -0.006(2) 
C65 0.045(3) 0.030(2) 0.041(2) -0.017(2) 0.005(2) -0.004(2) 
C66 0.037(2) 0.029(2) 0.034(2) -0.0115(19) 0.0030(19) -0.0056(19) 
C67 0.103(5) 0.052(3) 0.097(5) -0.048(3) 0.050(4) -0.011(3) 
C70 0.032(2) 0.028(2) 0.034(2) -0.0128(18) 0.0005(18) -0.0116(18) 
C71 0.029(2) 0.025(2) 0.036(2) -0.0140(18) -0.0050(17) -0.0087(17) 
C72 0.041(2) 0.031(2) 0.031(2) -0.0128(18) 0.0010(19) -0.0119(19) 
C73 0.040(3) 0.033(2) 0.041(2) -0.021(2) 0.006(2) -0.008(2) 
C74 0.038(2) 0.024(2) 0.048(3) -0.016(2) 0.000(2) -0.0083(19) 
C75 0.045(3) 0.031(2) 0.042(2) -0.011(2) 0.009(2) -0.018(2) 
C76 0.035(2) 0.028(2) 0.040(2) -0.0167(19) 0.0042(19) -0.0082(18) 
C77 0.060(3) 0.028(2) 0.083(4) -0.029(3) 0.003(3) -0.006(2) 
C81 0.026(2) 0.028(2) 0.037(2) -0.0152(18) -0.0002(18) -0.0060(17) 
C82 0.037(3) 0.057(3) 0.030(2) -0.018(2) -0.004(2) -0.004(2) 
C83 0.034(3) 0.068(3) 0.046(3) -0.032(3) 0.002(2) 0.000(2) 
C84 0.034(2) 0.040(3) 0.053(3) -0.027(2) -0.010(2) 0.004(2) 
C85 0.045(3) 0.047(3) 0.044(3) -0.027(2) -0.016(2) 0.003(2) 
C86 0.039(3) 0.043(3) 0.042(2) -0.029(2) -0.002(2) -0.003(2) 
C87 0.043(3) 0.095(5) 0.087(4) -0.060(4) -0.004(3) 0.016(3) 
P1 0.082(3) 0.085(3) 0.0590(10) -0.0244(17) -0.0044(14) -0.039(3) 
F1 0.129(12) 0.121(10) 0.070(8) 0.005(8) -0.012(8) -0.094(10) 
F2 0.142(17) 0.076(12) 0.35(4) -0.09(2) -0.01(2) 0.015(11) 
F3 0.087(10) 0.161(16) 0.19(2) 0.015(15) -0.007(12) -0.016(10) 
F4 0.140(12) 0.18(2) 0.110(10) -0.081(12) -0.017(9) -0.072(14) 
F5 0.198(19) 0.21(2) 0.090(9) -0.059(11) 0.062(10) -0.150(19) 
F6 0.18(3) 0.30(4) 0.15(2) -0.15(3) -0.017(15) -0.10(3) 
P1A 0.082(3) 0.085(3) 0.0590(10) -0.0244(17) -0.0044(14) -0.039(3) 
F1A 0.144(12) 0.25(2) 0.162(15) -0.167(16) 0.054(10) -0.045(11) 
F2A 0.31(2) 0.076(9) 0.33(3) -0.059(17) -0.14(2) -0.066(11) 
F3A 0.137(11) 0.178(16) 0.084(8) -0.021(9) -0.045(7) 0.025(12) 
F4A 0.110(9) 0.126(14) 0.107(8) 0.023(7) -0.029(6) -0.055(9) 
F5A 0.182(13) 0.26(2) 0.147(11) -0.122(15) 0.084(10) -0.099(15) 
F6A 0.191(14) 0.143(12) 0.25(2) -0.134(13) -0.002(14) -0.068(11) 
Cl1 0.0873(11) 0.0791(11) 0.0863(11) -0.0454(9) 0.0089(9) -0.0371(9) 
C1S 0.050(3) 0.075(4) 0.055(3) -0.024(3) 0.003(3) -0.020(3) 
Cl2 0.0945(12) 0.0772(11) 0.0644(9) -0.0325(8) -0.0019(9) -0.0005(9) 
Cl3 0.1095(17) 0.1216(18) 0.1186(17) -0.0561(15) -0.0142(14) 0.0167(14) 
C2S 0.124(7) 0.109(6) 0.111(6) -0.060(5) 0.010(5) -0.040(5) 
Cl4 0.119(2) 0.175(3) 0.210(3) -0.076(3) 0.007(2) 0.049(2) 
 
_geom_special_details 
; 
 All esds (except the esd in the dihedral angle between two l.s. planes) 
 are estimated using the full covariance matrix.  The cell esds are taken 
 into account individually in the estimation of esds in distances, angles 
 and torsion angles; correlations between esds in cell parameters are only 
 used when they are defined by crystal symmetry.  An approximate (isotropic) 
 treatment of cell esds is used for estimating esds involving l.s. planes. 
; 
 
loop_ 
 _geom_bond_atom_site_label_1 
 _geom_bond_atom_site_label_2 
 _geom_bond_distance 
 _geom_bond_site_symmetry_2 
 _geom_bond_publ_flag 
Mo1 N7 2.111(3) . ? 
Mo1 Mo2 2.1245(5) . ? 
Mo1 N5 2.128(3) . ? 
Mo1 N1 2.143(3) . ? 
Mo1 N3 2.144(3) . ? 
Mo2 N4 2.109(3) . ? 
Mo2 N2 2.117(3) . ? 
Mo2 N6 2.117(3) . ? 
Mo2 N8 2.137(3) . ? 
N1 C1 1.344(4) . ? 
N1 C2 1.409(4) . ? 
N2 C1 1.350(4) . ? 
N2 C5 1.412(4) . ? 
N3 C30 1.325(5) . ? 
N3 C31 1.424(5) . ? 
N4 C30 1.326(5) . ? 
N4 C41 1.439(4) . ? 
N5 C50 1.329(5) . ? 
N5 C51 1.422(5) . ? 
N6 C50 1.327(5) . ? 
N6 C61 1.425(5) . ? 
N7 C70 1.332(5) . ? 
N7 C71 1.429(5) . ? 
N8 C70 1.309(5) . ? 
N8 C81 1.443(5) . ? 
O3 C34 1.372(5) . ? 
O3 C37 1.412(5) . ? 
O4 C44 1.371(5) . ? 
O4 C47 1.422(5) . ? 
O5 C54 1.367(5) . ? 
O5 C57 1.423(5) . ? 
O6 C64 1.371(5) . ? 
O6 C67 1.433(6) . ? 
O7 C74 1.372(5) . ? 
O7 C77 1.428(5) . ? 
O8 C84 1.375(5) . ? 
O8 C87 1.428(6) . ? 
C1 C1 1.446(7) 2_556 ? 
C2 C5 1.390(5) 2_556 ? 
C2 C3 1.398(5) . ? 
C3 C4 1.376(5) . ? 
C4 C7 1.382(6) 2_556 ? 
C5 C2 1.390(5) 2_556 ? 
C5 C6 1.399(5) . ? 
C6 C7 1.378(5) . ? 
C7 C4 1.382(6) 2_556 ? 
C31 C36 1.383(5) . ? 
C31 C32 1.387(5) . ? 
C32 C33 1.386(6) . ? 
C33 C34 1.377(6) . ? 
C34 C35 1.378(6) . ? 
C35 C36 1.388(5) . ? 
C41 C46 1.375(5) . ? 
C41 C42 1.383(6) . ? 
C42 C43 1.393(5) . ? 
C43 C44 1.375(6) . ? 
C44 C45 1.379(6) . ? 
C45 C46 1.392(6) . ? 
C51 C52 1.389(5) . ? 
C51 C56 1.394(5) . ? 
C52 C53 1.384(6) . ? 
C53 C54 1.384(6) . ? 
C54 C55 1.378(6) . ? 
C55 C56 1.382(6) . ? 
C61 C66 1.381(5) . ? 
C61 C62 1.391(5) . ? 
C62 C63 1.387(6) . ? 
C63 C64 1.379(6) . ? 
C64 C65 1.371(6) . ? 
C65 C66 1.377(5) . ? 
C71 C72 1.385(5) . ? 
C71 C76 1.390(5) . ? 
C72 C73 1.383(5) . ? 
C73 C74 1.376(6) . ? 
C74 C75 1.389(6) . ? 
C75 C76 1.376(5) . ? 
C81 C82 1.371(6) . ? 
C81 C86 1.382(6) . ? 
C82 C83 1.379(6) . ? 
C83 C84 1.362(6) . ? 
C84 C85 1.378(6) . ? 
C85 C86 1.387(6) . ? 
P1 F5 1.517(12) . ? 
P1 F4 1.526(12) . ? 
P1 F6 1.535(13) . ? 
P1 F2 1.537(13) . ? 
P1 F3 1.543(13) . ? 
P1 F1 1.554(10) . ? 
P1A F5A 1.503(11) . ? 
P1A F2A 1.507(10) . ? 
P1A F6A 1.526(11) . ? 
P1A F4A 1.535(11) . ? 
P1A F3A 1.543(11) . ? 
P1A F1A 1.547(9) . ? 
Cl1 C1S 1.733(6) . ? 
C1S Cl2 1.749(5) . ? 
Cl3 C2S 1.732(8) . ? 
C2S Cl4 1.699(8) . ? 
 
loop_ 
 _geom_angle_atom_site_label_1 
 _geom_angle_atom_site_label_2 
 _geom_angle_atom_site_label_3 
 _geom_angle 
 _geom_angle_site_symmetry_1 
 _geom_angle_site_symmetry_3 
 _geom_angle_publ_flag 
N7 Mo1 Mo2 91.20(9) . . ? 
N7 Mo1 N5 90.19(12) . . ? 
Mo2 Mo1 N5 91.79(8) . . ? 
N7 Mo1 N1 92.64(11) . . ? 
Mo2 Mo1 N1 92.19(8) . . ? 
N5 Mo1 N1 175.07(12) . . ? 
N7 Mo1 N3 174.76(12) . . ? 
Mo2 Mo1 N3 93.89(8) . . ? 
N5 Mo1 N3 88.43(12) . . ? 
N1 Mo1 N3 88.40(11) . . ? 
N4 Mo2 N2 93.61(12) . . ? 
N4 Mo2 N6 89.66(12) . . ? 
N2 Mo2 N6 173.52(12) . . ? 
N4 Mo2 Mo1 90.81(8) . . ? 
N2 Mo2 Mo1 92.70(8) . . ? 
N6 Mo2 Mo1 92.85(8) . . ? 
N4 Mo2 N8 175.90(12) . . ? 
N2 Mo2 N8 87.24(11) . . ? 
N6 Mo2 N8 89.11(12) . . ? 
Mo1 Mo2 N8 93.15(9) . . ? 
C1 N1 C2 117.9(3) . . ? 
C1 N1 Mo1 118.2(2) . . ? 
C2 N1 Mo1 123.9(2) . . ? 
C1 N2 C5 118.2(3) . . ? 
C1 N2 Mo2 118.9(2) . . ? 
C5 N2 Mo2 122.8(2) . . ? 
C30 N3 C31 118.4(3) . . ? 
C30 N3 Mo1 114.9(3) . . ? 
C31 N3 Mo1 126.3(2) . . ? 
C30 N4 C41 118.9(3) . . ? 
C30 N4 Mo2 119.6(2) . . ? 
C41 N4 Mo2 120.1(2) . . ? 
C50 N5 C51 118.4(3) . . ? 
C50 N5 Mo1 117.7(2) . . ? 
C51 N5 Mo1 122.6(2) . . ? 
C50 N6 C61 119.2(3) . . ? 
C50 N6 Mo2 117.2(2) . . ? 
C61 N6 Mo2 123.4(2) . . ? 
C70 N7 C71 119.1(3) . . ? 
C70 N7 Mo1 119.0(2) . . ? 
C71 N7 Mo1 120.5(2) . . ? 
C70 N8 C81 119.1(3) . . ? 
C70 N8 Mo2 116.4(3) . . ? 
C81 N8 Mo2 123.9(2) . . ? 
C34 O3 C37 117.2(3) . . ? 
C44 O4 C47 116.1(3) . . ? 
C54 O5 C57 117.7(4) . . ? 
C64 O6 C67 117.2(4) . . ? 
C74 O7 C77 115.8(3) . . ? 
C84 O8 C87 117.5(4) . . ? 
N1 C1 N2 117.9(3) . . ? 
N1 C1 C1 121.6(4) . 2_556 ? 
N2 C1 C1 120.5(4) . 2_556 ? 
C5 C2 C3 119.2(3) 2_556 . ? 
C5 C2 N1 120.9(3) 2_556 . ? 
C3 C2 N1 119.9(3) . . ? 
C4 C3 C2 120.7(4) . . ? 
C3 C4 C7 120.3(4) . 2_556 ? 
C2 C5 C6 119.2(3) 2_556 . ? 
C2 C5 N2 120.8(3) 2_556 . ? 
C6 C5 N2 120.0(3) . . ? 
C7 C6 C5 121.0(4) . . ? 
C6 C7 C4 119.5(4) . 2_556 ? 
N3 C30 N4 120.6(4) . . ? 
C36 C31 C32 118.2(4) . . ? 
C36 C31 N3 119.7(3) . . ? 
C32 C31 N3 122.0(3) . . ? 
C33 C32 C31 120.4(4) . . ? 
C34 C33 C32 120.5(4) . . ? 
O3 C34 C33 115.4(4) . . ? 
O3 C34 C35 124.4(4) . . ? 
C33 C34 C35 120.1(4) . . ? 
C34 C35 C36 118.9(4) . . ? 
C31 C36 C35 121.9(4) . . ? 
C46 C41 C42 119.7(4) . . ? 
C46 C41 N4 121.8(4) . . ? 
C42 C41 N4 118.0(3) . . ? 
C41 C42 C43 120.7(4) . . ? 
C44 C43 C42 119.2(4) . . ? 
O4 C44 C43 123.9(4) . . ? 
O4 C44 C45 115.8(4) . . ? 
C43 C44 C45 120.3(4) . . ? 
C44 C45 C46 120.3(4) . . ? 
C41 C46 C45 119.7(4) . . ? 
N6 C50 N5 120.1(3) . . ? 
C52 C51 C56 118.8(4) . . ? 
C52 C51 N5 121.1(3) . . ? 
C56 C51 N5 120.0(3) . . ? 
C53 C52 C51 120.1(4) . . ? 
C54 C53 C52 120.3(4) . . ? 
O5 C54 C55 124.7(4) . . ? 
O5 C54 C53 115.2(4) . . ? 
C55 C54 C53 120.1(4) . . ? 
C54 C55 C56 119.6(4) . . ? 
C55 C56 C51 120.9(4) . . ? 
C66 C61 C62 118.2(4) . . ? 
C66 C61 N6 119.4(3) . . ? 
C62 C61 N6 122.2(4) . . ? 
C63 C62 C61 119.7(4) . . ? 
C64 C63 C62 120.5(4) . . ? 
O6 C64 C65 124.3(4) . . ? 
O6 C64 C63 115.3(4) . . ? 
C65 C64 C63 120.4(4) . . ? 
C64 C65 C66 118.7(4) . . ? 
C65 C66 C61 122.3(4) . . ? 
N8 C70 N7 120.1(4) . . ? 
C72 C71 C76 119.2(4) . . ? 
C72 C71 N7 119.2(3) . . ? 
C76 C71 N7 121.1(3) . . ? 
C73 C72 C71 120.6(4) . . ? 
C74 C73 C72 119.9(4) . . ? 
O7 C74 C73 124.6(4) . . ? 
O7 C74 C75 115.6(4) . . ? 
C73 C74 C75 119.8(4) . . ? 
C76 C75 C74 120.2(4) . . ? 
C75 C76 C71 120.2(4) . . ? 
C82 C81 C86 118.7(4) . . ? 
C82 C81 N8 120.5(4) . . ? 
C86 C81 N8 120.5(4) . . ? 
C81 C82 C83 121.3(4) . . ? 
C84 C83 C82 119.7(4) . . ? 
C83 C84 O8 123.5(4) . . ? 
C83 C84 C85 120.1(4) . . ? 
O8 C84 C85 116.4(4) . . ? 
C84 C85 C86 119.9(4) . . ? 
C81 C86 C85 120.2(4) . . ? 
F5 P1 F4 84.4(10) . . ? 
F5 P1 F6 94.7(13) . . ? 
F4 P1 F6 178.9(14) . . ? 
F5 P1 F2 90.4(15) . . ? 
F4 P1 F2 89.2(15) . . ? 
F6 P1 F2 90.2(17) . . ? 
F5 P1 F3 91.2(14) . . ? 
F4 P1 F3 89.5(13) . . ? 
F6 P1 F3 91.1(15) . . ? 
F2 P1 F3 177.8(16) . . ? 
F5 P1 F1 175.8(12) . . ? 
F4 P1 F1 91.5(8) . . ? 
F6 P1 F1 89.4(9) . . ? 
F2 P1 F1 90.4(10) . . ? 
F3 P1 F1 87.8(8) . . ? 
F5A P1A F2A 90.3(11) . . ? 
F5A P1A F6A 90.8(11) . . ? 
F2A P1A F6A 176.5(12) . . ? 
F5A P1A F4A 92.0(11) . . ? 
F2A P1A F4A 86.8(10) . . ? 
F6A P1A F4A 89.8(10) . . ? 
F5A P1A F3A 91.4(11) . . ? 
F2A P1A F3A 92.3(13) . . ? 
F6A P1A F3A 91.0(10) . . ? 
F4A P1A F3A 176.5(11) . . ? 
F5A P1A F1A 178.4(11) . . ? 
F2A P1A F1A 90.8(9) . . ? 
F6A P1A F1A 88.3(7) . . ? 
F4A P1A F1A 89.2(7) . . ? 
F3A P1A F1A 87.4(7) . . ? 
Cl1 C1S Cl2 113.0(3) . . ? 
Cl4 C2S Cl3 110.8(5) . . ? 
 
_diffrn_measured_fraction_theta_max    0.983 
_diffrn_reflns_theta_full              25.32 
_diffrn_measured_fraction_theta_full   0.983 
_refine_diff_density_max    0.689 
_refine_diff_density_min   -0.586 
_refine_diff_density_rms    0.081 

=============the end of compound 3=================

============compound 4============================
 
data_xl 
 
_audit_creation_method            SHELXL-97 
_chemical_name_systematic 
; 
 ? 
; 
_chemical_name_common             '[Mo2(DAniF)3(C14H9N4)]' 
_chemical_melting_point           ? 
_chemical_formula_moiety          '[Mo2(C15H15N2O2)3(C14H9N4)]' 
_chemical_formula_sum 
 'C59 H54 Mo2 N10 O6' 
_chemical_formula_weight          1191.00 
 
loop_ 
 _atom_type_symbol 
 _atom_type_description 
 _atom_type_scat_dispersion_real 
 _atom_type_scat_dispersion_imag 
 _atom_type_scat_source 
 'C'  'C'   0.0033   0.0016 
 'International Tables Vol C Tables 4.2.6.8 and 6.1.1.4' 
 'H'  'H'   0.0000   0.0000 
 'International Tables Vol C Tables 4.2.6.8 and 6.1.1.4' 
 'N'  'N'   0.0061   0.0033 
 'International Tables Vol C Tables 4.2.6.8 and 6.1.1.4' 
 'O'  'O'   0.0106   0.0060 
 'International Tables Vol C Tables 4.2.6.8 and 6.1.1.4' 
 'Mo'  'Mo'  -1.6832   0.6857 
 'International Tables Vol C Tables 4.2.6.8 and 6.1.1.4' 
 
_symmetry_cell_setting            monoclinic 
_symmetry_space_group_name_H-M    'P 2(1)/c' 
 
loop_ 
 _symmetry_equiv_pos_as_xyz 
 'x, y, z' 
 '-x, y+1/2, -z+1/2' 
 '-x, -y, -z' 
 'x, -y-1/2, z-1/2' 
 
_cell_length_a                    14.6700(9) 
_cell_length_b                    17.8949(11) 
_cell_length_c                    20.7251(12) 
_cell_angle_alpha                 90.00 
_cell_angle_beta                  95.3580(10) 
_cell_angle_gamma                 90.00 
_cell_volume                      5416.9(6) 
_cell_formula_units_Z             4 
_cell_measurement_temperature     213(2) 
_cell_measurement_reflns_used     21338
_cell_measurement_theta_min       2.557 
_cell_measurement_theta_max       25.0245 
 
_exptl_crystal_description        block 
_exptl_crystal_colour             'orange red' 
_exptl_crystal_size_max           0.325 
_exptl_crystal_size_mid           0.268 
_exptl_crystal_size_min           0.160 
_exptl_crystal_density_meas       ? 
_exptl_crystal_density_diffrn     1.460 
_exptl_crystal_density_method     'not measured' 
_exptl_crystal_F_000              2440 
_exptl_absorpt_coefficient_mu     0.525 
_exptl_absorpt_correction_type    multi-scan 
_exptl_absorpt_correction_T_min   0.8375 
_exptl_absorpt_correction_T_max   0.9194
_exptl_absorpt_process_details    'SADABS' 
 
_exptl_special_details 
; 
 ? 
; 
 
_diffrn_ambient_temperature       213(2) 
_diffrn_radiation_wavelength      0.71073 
_diffrn_radiation_type            MoK\a 
_diffrn_radiation_source          'normal-focus sealed tube' 
_diffrn_radiation_monochromator   graphite 
_diffrn_measurement_device_type   'BRUKER SMART 1000' 
_diffrn_measurement_method        '\w-scans'
_diffrn_detector_area_resol_mean  ? 
_diffrn_standards_number          'none (area detector data)' 
_diffrn_standards_interval_count  ? 
_diffrn_standards_interval_time   ? 
_diffrn_standards_decay_%         ? 
_diffrn_reflns_number             28849 
_diffrn_reflns_av_R_equivalents   0.0184 
_diffrn_reflns_av_sigmaI/netI     0.0211 
_diffrn_reflns_limit_h_min        -17 
_diffrn_reflns_limit_h_max        17 
_diffrn_reflns_limit_k_min        -21 
_diffrn_reflns_limit_k_max        20 
_diffrn_reflns_limit_l_min        -20 
_diffrn_reflns_limit_l_max        24 
_diffrn_reflns_theta_min          1.80 
_diffrn_reflns_theta_max          25.04 
_reflns_number_total              9553 
_reflns_number_gt                 7995 
_reflns_threshold_expression      >2sigma(I) 
 
_computing_data_collection        SMART
_computing_cell_refinement        SAINT 
_computing_data_reduction         SAINT 
_computing_structure_solution     'SHELXS-97 (Sheldrick, 1990)' 
_computing_structure_refinement   'SHELXL-97 (Sheldrick, 1997)' 
_computing_molecular_graphics     XP 
_computing_publication_material   CIFTAB 
 
_refine_special_details 
; 
 Refinement of F^2^ against ALL reflections.  The weighted R-factor wR and 
 goodness of fit S are based on F^2^, conventional R-factors R are based 
 on F, with F set to zero for negative F^2^. The threshold expression of 
 F^2^ > 2sigma(F^2^) is used only for calculating R-factors(gt) etc. and is 
 not relevant to the choice of reflections for refinement.  R-factors based 
 on F^2^ are statistically about twice as large as those based on F, and R- 
 factors based on ALL data will be even larger. 
; 
 
_refine_ls_structure_factor_coef  Fsqd  
_refine_ls_matrix_type            full 
_refine_ls_weighting_scheme       calc  
_refine_ls_weighting_details 
 'calc w=1/[\s^2^(Fo^2^)+(0.0390P)^2^+6.6114P] where P=(Fo^2^+2Fc^2^)/3' 
_atom_sites_solution_primary      direct 
_atom_sites_solution_secondary    difmap 
_atom_sites_solution_hydrogens    geom 
_refine_ls_hydrogen_treatment     noref 
_refine_ls_extinction_method      none 
_refine_ls_extinction_coef        ? 
_refine_ls_number_reflns          9553 
_refine_ls_number_parameters      754 
_refine_ls_number_restraints      0 
_refine_ls_R_factor_all           0.0426 
_refine_ls_R_factor_gt            0.0323 
_refine_ls_wR_factor_ref          0.0888 
_refine_ls_wR_factor_gt           0.0806 
_refine_ls_goodness_of_fit_ref    1.049 
_refine_ls_restrained_S_all       1.049 
_refine_ls_shift/su_max           0.001 
_refine_ls_shift/su_mean          0.000 
 
loop_ 
 _atom_site_label 
 _atom_site_type_symbol 
 _atom_site_fract_x 
 _atom_site_fract_y 
 _atom_site_fract_z 
 _atom_site_U_iso_or_equiv 
 _atom_site_adp_type 
 _atom_site_occupancy 
 _atom_site_symmetry_multiplicity 
 _atom_site_calc_flag 
 _atom_site_refinement_flags 
 _atom_site_disorder_assembly 
 _atom_site_disorder_group 
Mo1 Mo 0.430389(15) 0.235329(13) 0.158777(11) 0.02638(7) Uani 1 1 d . . . 
Mo2 Mo 0.294369(15) 0.271512(13) 0.143889(11) 0.02611(7) Uani 1 1 d . B . 
N1 N 0.47133(15) 0.33319(13) 0.21627(11) 0.0308(5) Uani 1 1 d . . . 
N2 N 0.32157(15) 0.37266(13) 0.19770(11) 0.0299(5) Uani 1 1 d . . . 
N3 N 0.47028(15) 0.29162(14) 0.07392(11) 0.0313(5) Uani 1 1 d . . . 
N4 N 0.32033(15) 0.32943(13) 0.05645(11) 0.0299(5) Uani 1 1 d . . . 
N5 N 0.40153(16) 0.13342(13) 0.10589(11) 0.0323(5) Uani 1 1 d . . . 
N6 N 0.25111(16) 0.17110(14) 0.09184(11) 0.0325(5) Uani 1 1 d . . . 
N7 N 0.40523(15) 0.17817(13) 0.24682(10) 0.0276(5) Uani 1 1 d . . . 
N8 N 0.25854(15) 0.22584(13) 0.23457(11) 0.0295(5) Uani 1 1 d . . . 
N9 N 0.37547(18) 0.12506(16) 0.37227(13) 0.0427(6) Uani 1 1 d . B . 
N10 N 0.23300(18) 0.17920(17) 0.36034(14) 0.0459(7) Uani 1 1 d . B . 
O2 O 0.06328(19) 0.57282(17) 0.27751(15) 0.0738(8) Uani 1 1 d . . . 
O3 O 0.82767(18) 0.28577(19) -0.00025(16) 0.0781(9) Uani 1 1 d . . . 
O4 O 0.05042(17) 0.50795(14) -0.07515(13) 0.0600(7) Uani 1 1 d . . . 
O5 O 0.64893(17) -0.09667(14) 0.06824(12) 0.0539(6) Uani 1 1 d . . . 
C1 C 0.32458(19) 0.18862(16) 0.27094(13) 0.0301(6) Uani 1 1 d . B . 
C2 C 0.3137(2) 0.16193(17) 0.33596(14) 0.0360(7) Uani 1 1 d . . . 
C10 C 0.40620(19) 0.38285(16) 0.22458(14) 0.0330(6) Uani 1 1 d . . . 
H10B H 0.4201 0.4252 0.2495 0.040 Uiso 1 1 calc R . . 
C11 C 0.56236(19) 0.35674(17) 0.23716(14) 0.0340(7) Uani 1 1 d . A . 
C12 C 0.6224(2) 0.3094(2) 0.27262(18) 0.0538(9) Uani 1 1 d . . . 
H12A H 0.6027 0.2627 0.2854 0.065 Uiso 1 1 calc R . . 
C13 C 0.7123(3) 0.3317(3) 0.2891(2) 0.0783(14) Uani 1 1 d . A . 
H13A H 0.7529 0.2986 0.3111 0.094 Uiso 1 1 calc R . . 
C14 C 0.7425(3) 0.4012(3) 0.2737(2) 0.0723(13) Uani 1 1 d . . . 
C15 C 0.6839(3) 0.4479(2) 0.2392(2) 0.0709(13) Uani 1 1 d . A . 
H15A H 0.7033 0.4952 0.2279 0.085 Uiso 1 1 calc R . . 
C16 C 0.5949(2) 0.4250(2) 0.2204(2) 0.0545(9) Uani 1 1 d . . . 
H16A H 0.5560 0.4573 0.1957 0.065 Uiso 1 1 calc R A . 
O1 O 0.8351(10) 0.4231(16) 0.2848(14) 0.088(5) Uani 0.63(7) 1 d P A 1 
C17 C 0.8596(14) 0.497(2) 0.281(2) 0.125(8) Uani 0.63(7) 1 d P A 1 
H17A H 0.9238 0.5018 0.2940 0.188 Uiso 0.63(7) 1 calc PR A 1 
H17B H 0.8254 0.5258 0.3094 0.188 Uiso 0.63(7) 1 calc PR A 1 
H17C H 0.8467 0.5139 0.2373 0.188 Uiso 0.63(7) 1 calc PR A 1 
O1B O 0.826(3) 0.4053(18) 0.309(3) 0.100(9) Uani 0.37(7) 1 d P A 2 
C17B C 0.861(2) 0.475(2) 0.314(3) 0.103(11) Uani 0.37(7) 1 d P A 2 
H17D H 0.9204 0.4731 0.3377 0.155 Uiso 0.37(7) 1 calc PR A 2 
H17E H 0.8214 0.5061 0.3374 0.155 Uiso 0.37(7) 1 calc PR A 2 
H17F H 0.8654 0.4951 0.2719 0.155 Uiso 0.37(7) 1 calc PR A 2 
C21 C 0.25429(18) 0.42317(16) 0.21747(14) 0.0312(6) Uani 1 1 d . . . 
C22 C 0.2476(2) 0.43852(19) 0.28248(15) 0.0416(7) Uani 1 1 d . . . 
H22A H 0.2869 0.4148 0.3139 0.050 Uiso 1 1 calc R . . 
C24 C 0.1244(2) 0.5235(2) 0.25479(18) 0.0482(8) Uani 1 1 d . . . 
C25 C 0.1279(2) 0.50699(19) 0.18995(16) 0.0425(8) Uani 1 1 d . . . 
H25A H 0.0871 0.5294 0.1588 0.051 Uiso 1 1 calc R . . 
C26 C 0.19260(19) 0.45687(17) 0.17173(15) 0.0338(6) Uani 1 1 d . . . 
H26A H 0.1947 0.4456 0.1281 0.041 Uiso 1 1 calc R . . 
C27 C 0.0137(4) 0.6181(3) 0.2303(3) 0.122(2) Uani 1 1 d . . . 
H27A H -0.0272 0.6502 0.2510 0.183 Uiso 1 1 calc R . . 
H27B H -0.0210 0.5869 0.1993 0.183 Uiso 1 1 calc R . . 
H27C H 0.0557 0.6480 0.2084 0.183 Uiso 1 1 calc R . . 
C30 C 0.40511(19) 0.32969(17) 0.03946(13) 0.0326(6) Uani 1 1 d . . . 
H30A H 0.4190 0.3566 0.0033 0.039 Uiso 1 1 calc R . . 
C31 C 0.5593(2) 0.28987(17) 0.05151(15) 0.0347(7) Uani 1 1 d . . . 
C32 C 0.5749(2) 0.2923(2) -0.01313(16) 0.0451(8) Uani 1 1 d . . . 
H32A H 0.5253 0.2948 -0.0445 0.054 Uiso 1 1 calc R . . 
C33 C 0.6633(2) 0.2912(2) -0.03228(18) 0.0542(9) Uani 1 1 d . . . 
H33A H 0.6725 0.2937 -0.0760 0.065 Uiso 1 1 calc R . . 
C34 C 0.7374(2) 0.2863(2) 0.0136(2) 0.0527(9) Uani 1 1 d . . . 
C35 C 0.7227(2) 0.2814(2) 0.07784(19) 0.0541(9) Uani 1 1 d . . . 
H35A H 0.7724 0.2765 0.1089 0.065 Uiso 1 1 calc R . . 
C36 C 0.6358(2) 0.2835(2) 0.09673(17) 0.0460(8) Uani 1 1 d . . . 
H36A H 0.6275 0.2808 0.1406 0.055 Uiso 1 1 calc R . . 
C37 C 0.8451(3) 0.2923(4) -0.0656(3) 0.121(3) Uani 1 1 d . . . 
H37A H 0.9099 0.2911 -0.0688 0.182 Uiso 1 1 calc R . . 
H37B H 0.8206 0.3388 -0.0828 0.182 Uiso 1 1 calc R . . 
H37C H 0.8165 0.2516 -0.0900 0.182 Uiso 1 1 calc R . . 
C41 C 0.25498(19) 0.37698(16) 0.02188(13) 0.0303(6) Uani 1 1 d . . . 
C42 C 0.2772(2) 0.44646(17) -0.00257(14) 0.0353(7) Uani 1 1 d . . . 
H42A H 0.3375 0.4630 0.0033 0.042 Uiso 1 1 calc R . . 
C43 C 0.2113(2) 0.49178(18) -0.03564(15) 0.0414(7) Uani 1 1 d . . . 
H43A H 0.2279 0.5374 -0.0525 0.050 Uiso 1 1 calc R . . 
C44 C 0.1208(2) 0.46848(18) -0.04329(15) 0.0417(8) Uani 1 1 d . . . 
C45 C 0.0970(2) 0.40052(19) -0.01763(16) 0.0427(8) Uani 1 1 d . . . 
H45A H 0.0362 0.3853 -0.0219 0.051 Uiso 1 1 calc R . . 
C46 C 0.1633(2) 0.35487(18) 0.01454(15) 0.0381(7) Uani 1 1 d . . . 
H46A H 0.1464 0.3092 0.0313 0.046 Uiso 1 1 calc R . . 
C47 C 0.0715(3) 0.5777(2) -0.1023(2) 0.0681(12) Uani 1 1 d . . . 
H47A H 0.0167 0.5996 -0.1232 0.102 Uiso 1 1 calc R . . 
H47B H 0.1151 0.5705 -0.1335 0.102 Uiso 1 1 calc R . . 
H47C H 0.0970 0.6104 -0.0686 0.102 Uiso 1 1 calc R . . 
C50 C 0.3154(2) 0.12103(17) 0.08375(14) 0.0348(7) Uani 1 1 d . B . 
H50A H 0.2998 0.0766 0.0622 0.042 Uiso 1 1 calc R . . 
C51 C 0.4641(2) 0.07303(17) 0.09876(13) 0.0343(7) Uani 1 1 d . . . 
C52 C 0.4424(2) 0.00017(18) 0.11291(15) 0.0425(8) Uani 1 1 d . . . 
H52A H 0.3869 -0.0099 0.1293 0.051 Uiso 1 1 calc R . . 
C53 C 0.5016(2) -0.05838(19) 0.10321(16) 0.0457(8) Uani 1 1 d . . . 
H53A H 0.4856 -0.1073 0.1123 0.055 Uiso 1 1 calc R . . 
C54 C 0.5847(2) -0.04308(18) 0.07978(15) 0.0406(8) Uani 1 1 d . . . 
C55 C 0.6087(2) 0.02975(19) 0.06800(16) 0.0455(8) Uani 1 1 d . . . 
H55 H 0.6657 0.0401 0.0540 0.055 Uiso 1 1 calc R . . 
C56 C 0.5489(2) 0.08738(18) 0.07685(15) 0.0408(7) Uani 1 1 d . . . 
H56A H 0.5655 0.1362 0.0681 0.049 Uiso 1 1 calc R . . 
C57 C 0.6211(3) -0.1724(2) 0.0710(2) 0.0657(11) Uani 1 1 d . . . 
H57A H 0.6711 -0.2043 0.0624 0.099 Uiso 1 1 calc R . . 
H57B H 0.5704 -0.1810 0.0391 0.099 Uiso 1 1 calc R . . 
H57C H 0.6029 -0.1831 0.1133 0.099 Uiso 1 1 calc R . . 
C61 C 0.1682(11) 0.1528(10) 0.0575(7) 0.0241(19) Uani 0.580(11) 1 d P B 1 
C62 C 0.0898(18) 0.1575(13) 0.0920(8) 0.045(3) Uani 0.580(11) 1 d P B 1 
H62 H 0.0974 0.1732 0.1349 0.054 Uiso 0.580(11) 1 calc PR B 1 
C63 C 0.004(3) 0.140(3) 0.066(3) 0.072(6) Uani 0.580(11) 1 d P B 1 
H63 H -0.0463 0.1450 0.0898 0.087 Uiso 0.580(11) 1 calc PR B 1 
C64 C -0.0041(9) 0.1151(9) 0.0014(8) 0.049(3) Uani 0.580(11) 1 d P B 1 
C65 C 0.0690(9) 0.1065(10) -0.0321(7) 0.050(3) Uani 0.580(11) 1 d P B 1 
H65 H 0.0624 0.0869 -0.0738 0.060 Uiso 0.580(11) 1 calc PR B 1 
C66 C 0.1547(11) 0.1271(14) -0.0035(11) 0.044(2) Uani 0.580(11) 1 d P B 1 
H66 H 0.2049 0.1230 -0.0276 0.053 Uiso 0.580(11) 1 calc PR B 1 
O6 O -0.0898(5) 0.0971(5) -0.0325(5) 0.081(3) Uani 0.580(11) 1 d P B 1 
C67 C -0.1671(8) 0.0906(6) 0.0015(7) 0.087(4) Uani 0.580(11) 1 d P B 1 
H67A H -0.2192 0.0781 -0.0281 0.131 Uiso 0.580(11) 1 calc PR B 1 
H67B H -0.1780 0.1372 0.0224 0.131 Uiso 0.580(11) 1 calc PR B 1 
H67C H -0.1573 0.0519 0.0335 0.131 Uiso 0.580(11) 1 calc PR B 1 
C61B C 0.1508(17) 0.1535(16) 0.0716(11) 0.0241(19) Uani 0.420(11) 1 d P B 2 
C62B C 0.084(3) 0.166(2) 0.1093(12) 0.045(3) Uani 0.420(11) 1 d P B 2 
H62B H 0.0940 0.1867 0.1507 0.054 Uiso 0.420(11) 1 calc PR B 2 
C63B C -0.008(5) 0.146(5) 0.081(4) 0.072(6) Uani 0.420(11) 1 d P B 2 
H63B H -0.0562 0.1544 0.1056 0.087 Uiso 0.420(11) 1 calc PR B 2 
C64B C -0.0279(13) 0.1164(14) 0.0212(10) 0.049(3) Uani 0.420(11) 1 d P B 2 
C65B C 0.0436(16) 0.1066(15) -0.0152(10) 0.050(3) Uani 0.420(11) 1 d P B 2 
H65B H 0.0320 0.0875 -0.0569 0.060 Uiso 0.420(11) 1 calc PR B 2 
C66B C 0.1318(17) 0.124(2) 0.0070(16) 0.044(2) Uani 0.420(11) 1 d P B 2 
H66B H 0.1791 0.1163 -0.0193 0.053 Uiso 0.420(11) 1 calc PR B 2 
O6B O -0.1158(9) 0.0982(6) 0.0075(7) 0.084(4) Uani 0.420(11) 1 d P B 2 
C67B C -0.1392(11) 0.0691(8) -0.0570(7) 0.095(6) Uani 0.420(11) 1 d P B 2 
H67D H -0.2034 0.0580 -0.0628 0.143 Uiso 0.420(11) 1 calc PR B 2 
H67E H -0.1048 0.0244 -0.0628 0.143 Uiso 0.420(11) 1 calc PR B 2 
H67F H -0.1248 0.1057 -0.0884 0.143 Uiso 0.420(11) 1 calc PR B 2 
C71 C 0.4721(2) 0.13603(16) 0.28328(14) 0.0325(6) Uani 1 1 d . B . 
C72 C 0.4567(2) 0.11006(17) 0.34529(14) 0.0362(7) Uani 1 1 d . . . 
C73 C 0.5252(2) 0.06874(19) 0.38086(16) 0.0458(8) Uani 1 1 d . B . 
H73A H 0.5148 0.0502 0.4214 0.055 Uiso 1 1 calc R . . 
C74 C 0.6072(2) 0.0554(2) 0.35647(17) 0.0484(8) Uani 1 1 d . . . 
H74A H 0.6529 0.0290 0.3810 0.058 Uiso 1 1 calc R B . 
C75 C 0.6222(2) 0.08095(19) 0.29554(16) 0.0446(8) Uani 1 1 d . B . 
H75A H 0.6780 0.0717 0.2792 0.054 Uiso 1 1 calc R . . 
C76 C 0.5554(2) 0.12005(18) 0.25869(15) 0.0388(7) Uani 1 1 d . . . 
H76A H 0.5658 0.1359 0.2173 0.047 Uiso 1 1 calc R B . 
C81 C 0.1795(2) 0.24666(18) 0.26417(15) 0.0370(7) Uani 1 1 d . B . 
C82 C 0.1672(2) 0.22571(19) 0.32777(16) 0.0411(7) Uani 1 1 d . . . 
C83 C 0.0915(2) 0.2512(2) 0.35731(18) 0.0525(9) Uani 1 1 d . B . 
H83A H 0.0847 0.2380 0.4000 0.063 Uiso 1 1 calc R . . 
C84 C 0.0272(2) 0.2953(2) 0.32420(19) 0.0560(10) Uani 1 1 d . . . 
H84A H -0.0226 0.3125 0.3446 0.067 Uiso 1 1 calc R B . 
C85 C 0.0359(2) 0.3145(2) 0.26036(18) 0.0491(9) Uani 1 1 d . B . 
H85A H -0.0090 0.3430 0.2372 0.059 Uiso 1 1 calc R . . 
C86 C 0.1120(2) 0.29083(18) 0.23127(16) 0.0405(7) Uani 1 1 d . . . 
H86A H 0.1183 0.3047 0.1887 0.049 Uiso 1 1 calc R B . 
C23 C 0.1832(2) 0.4886(2) 0.30127(16) 0.0484(8) Uani 1 1 d . . . 
H23A H 0.1796 0.4987 0.3450 0.058 Uiso 1 1 calc R . . 
H10 H 0.223(3) 0.165(3) 0.405(2) 0.096(16) Uiso 1 1 d . . . 
 
loop_ 
 _atom_site_aniso_label 
 _atom_site_aniso_U_11 
 _atom_site_aniso_U_22 
 _atom_site_aniso_U_33 
 _atom_site_aniso_U_23 
 _atom_site_aniso_U_13 
 _atom_site_aniso_U_12 
Mo1 0.02670(13) 0.02843(14) 0.02405(13) 0.00280(9) 0.00257(9) 0.00317(10) 
Mo2 0.02588(13) 0.02903(14) 0.02322(13) 0.00236(9) 0.00132(9) 0.00178(9) 
N1 0.0269(12) 0.0315(13) 0.0332(13) -0.0008(10) -0.0008(10) 0.0023(10) 
N2 0.0293(12) 0.0284(12) 0.0314(13) 0.0006(10) -0.0001(10) 0.0050(10) 
N3 0.0291(12) 0.0364(13) 0.0285(13) 0.0052(10) 0.0037(10) 0.0048(10) 
N4 0.0316(12) 0.0348(13) 0.0231(12) 0.0039(10) 0.0005(10) 0.0040(10) 
N5 0.0373(13) 0.0315(13) 0.0283(13) -0.0008(10) 0.0041(10) 0.0044(11) 
N6 0.0343(13) 0.0334(13) 0.0294(13) -0.0030(10) 0.0001(10) -0.0006(11) 
N7 0.0314(12) 0.0277(12) 0.0234(12) 0.0027(9) 0.0004(9) 0.0024(10) 
N8 0.0281(12) 0.0346(13) 0.0262(12) 0.0037(10) 0.0044(10) 0.0030(10) 
N9 0.0465(16) 0.0470(16) 0.0351(14) 0.0065(12) 0.0065(12) 0.0075(13) 
N10 0.0417(15) 0.0587(19) 0.0384(16) 0.0143(14) 0.0101(12) 0.0059(13) 
O2 0.0666(18) 0.079(2) 0.078(2) -0.0141(16) 0.0187(15) 0.0330(16) 
O3 0.0417(15) 0.108(3) 0.088(2) -0.0330(19) 0.0269(14) -0.0139(15) 
O4 0.0530(15) 0.0519(15) 0.0698(17) 0.0135(13) -0.0223(13) 0.0090(12) 
O5 0.0610(15) 0.0483(15) 0.0512(15) -0.0115(11) -0.0010(12) 0.0207(12) 
C1 0.0340(15) 0.0290(15) 0.0273(15) 0.0033(12) 0.0035(12) -0.0005(12) 
C2 0.0371(16) 0.0393(17) 0.0318(16) 0.0044(13) 0.0048(13) 0.0005(13) 
C10 0.0337(16) 0.0312(16) 0.0334(16) -0.0039(12) -0.0010(12) 0.0004(12) 
C11 0.0299(15) 0.0368(17) 0.0343(16) -0.0057(13) -0.0014(12) 0.0051(13) 
C12 0.046(2) 0.055(2) 0.057(2) 0.0077(18) -0.0120(17) 0.0000(17) 
C13 0.048(2) 0.096(4) 0.084(3) 0.003(3) -0.027(2) 0.015(2) 
C14 0.035(2) 0.077(3) 0.101(4) -0.031(3) -0.010(2) -0.005(2) 
C15 0.043(2) 0.050(2) 0.121(4) -0.018(2) 0.013(2) -0.0115(18) 
C16 0.0395(18) 0.041(2) 0.082(3) 0.0034(18) -0.0010(18) 0.0026(15) 
O1 0.036(3) 0.106(11) 0.120(11) -0.016(7) -0.001(5) -0.020(5) 
C17 0.055(7) 0.140(17) 0.18(2) -0.024(15) -0.003(10) -0.058(9) 
O1B 0.046(10) 0.100(11) 0.15(2) 0.016(13) -0.038(11) -0.029(7) 
C17B 0.068(12) 0.096(18) 0.14(3) -0.010(17) -0.027(15) -0.017(11) 
C21 0.0266(14) 0.0303(15) 0.0360(16) -0.0039(12) -0.0005(12) 0.0010(12) 
C22 0.0404(17) 0.0477(19) 0.0354(17) -0.0011(14) -0.0023(14) 0.0030(15) 
C24 0.0384(18) 0.048(2) 0.060(2) -0.0115(17) 0.0099(16) 0.0085(15) 
C25 0.0329(16) 0.0438(19) 0.049(2) -0.0026(15) -0.0027(14) 0.0070(14) 
C26 0.0305(15) 0.0360(16) 0.0342(16) -0.0045(13) -0.0003(12) 0.0012(13) 
C27 0.140(5) 0.110(5) 0.122(5) 0.006(4) 0.041(4) 0.081(4) 
C30 0.0379(16) 0.0363(16) 0.0242(14) 0.0065(12) 0.0061(12) 0.0001(13) 
C31 0.0354(16) 0.0334(16) 0.0364(17) 0.0066(13) 0.0085(13) 0.0018(13) 
C32 0.0427(18) 0.056(2) 0.0377(18) 0.0046(15) 0.0088(14) 0.0020(16) 
C33 0.053(2) 0.066(2) 0.047(2) -0.0007(18) 0.0225(17) -0.0013(18) 
C34 0.0354(18) 0.057(2) 0.068(3) -0.0144(19) 0.0175(17) -0.0052(16) 
C35 0.0368(18) 0.069(3) 0.056(2) -0.0081(19) 0.0039(16) 0.0035(17) 
C36 0.0391(18) 0.058(2) 0.0416(19) 0.0004(16) 0.0069(15) 0.0048(15) 
C37 0.062(3) 0.221(8) 0.087(4) -0.061(4) 0.048(3) -0.046(4) 
C41 0.0341(15) 0.0357(16) 0.0208(14) -0.0003(11) 0.0006(11) 0.0052(12) 
C42 0.0350(16) 0.0380(17) 0.0326(16) 0.0022(13) 0.0013(13) 0.0009(13) 
C43 0.0482(19) 0.0378(18) 0.0375(18) 0.0069(14) 0.0009(14) 0.0025(15) 
C44 0.0446(18) 0.0428(19) 0.0351(17) 0.0019(14) -0.0106(14) 0.0103(15) 
C45 0.0333(16) 0.0463(19) 0.0466(19) -0.0004(15) -0.0066(14) 0.0006(14) 
C46 0.0392(17) 0.0374(17) 0.0368(17) 0.0045(13) -0.0019(13) 0.0001(14) 
C47 0.068(3) 0.057(2) 0.074(3) 0.018(2) -0.021(2) 0.012(2) 
C50 0.0436(17) 0.0306(16) 0.0298(15) -0.0029(12) 0.0009(13) -0.0003(13) 
C51 0.0441(17) 0.0346(16) 0.0239(15) -0.0036(12) 0.0012(12) 0.0046(13) 
C52 0.0474(19) 0.0401(18) 0.0409(18) 0.0015(14) 0.0081(15) 0.0022(15) 
C53 0.058(2) 0.0355(18) 0.0434(19) 0.0029(14) 0.0016(16) 0.0051(15) 
C54 0.0480(19) 0.0404(18) 0.0317(16) -0.0075(13) -0.0061(14) 0.0130(15) 
C55 0.0454(19) 0.047(2) 0.0444(19) -0.0024(15) 0.0070(15) 0.0047(16) 
C56 0.0489(19) 0.0344(17) 0.0393(18) -0.0016(13) 0.0047(14) 0.0039(14) 
C57 0.079(3) 0.040(2) 0.076(3) -0.0131(19) -0.004(2) 0.019(2) 
C61 0.023(6) 0.0312(17) 0.021(7) 0.000(4) 0.016(3) -0.002(4) 
C62 0.044(4) 0.060(6) 0.032(9) -0.024(6) 0.004(7) -0.004(4) 
C63 0.034(11) 0.081(9) 0.10(2) -0.013(13) 0.012(8) -0.003(8) 
C64 0.023(7) 0.057(3) 0.067(10) -0.006(6) 0.000(4) -0.005(5) 
C65 0.046(8) 0.064(3) 0.039(7) -0.011(5) -0.002(4) -0.001(5) 
C66 0.032(8) 0.060(3) 0.041(7) -0.003(4) 0.006(4) -0.006(6) 
O6 0.047(4) 0.112(5) 0.082(5) -0.015(4) -0.006(4) -0.017(3) 
C67 0.045(5) 0.089(7) 0.126(11) -0.007(6) 0.002(6) -0.016(5) 
C61B 0.023(6) 0.0312(17) 0.021(7) 0.000(4) 0.016(3) -0.002(4) 
C62B 0.044(4) 0.060(6) 0.032(9) -0.024(6) 0.004(7) -0.004(4) 
C63B 0.034(11) 0.081(9) 0.10(2) -0.013(13) 0.012(8) -0.003(8) 
C64B 0.023(7) 0.057(3) 0.067(10) -0.006(6) 0.000(4) -0.005(5) 
C65B 0.046(8) 0.064(3) 0.039(7) -0.011(5) -0.002(4) -0.001(5) 
C66B 0.032(8) 0.060(3) 0.041(7) -0.003(4) 0.006(4) -0.006(6) 
O6B 0.047(7) 0.092(6) 0.108(9) -0.001(6) -0.027(7) -0.027(5) 
C67B 0.077(9) 0.109(10) 0.089(11) 0.020(8) -0.055(9) -0.044(8) 
C71 0.0384(16) 0.0303(15) 0.0283(15) -0.0005(12) -0.0004(12) 0.0011(13) 
C72 0.0414(17) 0.0362(17) 0.0302(16) 0.0028(13) -0.0004(13) 0.0045(13) 
C73 0.055(2) 0.048(2) 0.0331(17) 0.0049(14) 0.0007(15) 0.0122(16) 
C74 0.049(2) 0.052(2) 0.043(2) -0.0003(16) -0.0020(16) 0.0167(17) 
C75 0.0423(18) 0.0436(19) 0.047(2) 0.0020(15) 0.0001(15) 0.0083(15) 
C76 0.0407(17) 0.0393(18) 0.0366(17) 0.0035(13) 0.0054(14) 0.0066(14) 
C81 0.0331(15) 0.0408(17) 0.0376(17) 0.0053(13) 0.0055(13) -0.0022(13) 
C82 0.0372(17) 0.0477(19) 0.0392(18) 0.0074(14) 0.0072(14) 0.0021(14) 
C83 0.0446(19) 0.070(3) 0.045(2) 0.0086(18) 0.0164(16) 0.0059(18) 
C84 0.044(2) 0.065(2) 0.063(2) 0.0073(19) 0.0213(18) 0.0109(18) 
C85 0.0366(17) 0.056(2) 0.055(2) 0.0107(17) 0.0098(15) 0.0079(16) 
C86 0.0354(16) 0.0458(19) 0.0402(18) 0.0096(14) 0.0029(13) -0.0004(14) 
C23 0.049(2) 0.061(2) 0.0363(18) -0.0126(16) 0.0084(15) 0.0038(17) 
 
_geom_special_details 
; 
 All esds (except the esd in the dihedral angle between two l.s. planes) 
 are estimated using the full covariance matrix.  The cell esds are taken 
 into account individually in the estimation of esds in distances, angles 
 and torsion angles; correlations between esds in cell parameters are only 
 used when they are defined by crystal symmetry.  An approximate (isotropic) 
 treatment of cell esds is used for estimating esds involving l.s. planes. 
; 
 
loop_ 
 _geom_bond_atom_site_label_1 
 _geom_bond_atom_site_label_2 
 _geom_bond_distance 
 _geom_bond_site_symmetry_2 
 _geom_bond_publ_flag 
Mo1 Mo2 2.0931(3) . y 
Mo1 N5 2.149(2) . y 
Mo1 N7 2.154(2) . y 
Mo1 N3 2.155(2) . y 
Mo1 N1 2.171(2) . y 
Mo2 N2 2.144(2) . y 
Mo2 N4 2.152(2) . y 
Mo2 N8 2.159(2) . y 
Mo2 N6 2.160(2) . y 
N1 C10 1.328(4) . ? 
N1 C11 1.428(4) . ? 
N2 C10 1.325(4) . ? 
N2 C21 1.426(4) . ? 
N3 C30 1.327(4) . ? 
N3 C31 1.427(4) . ? 
N4 C30 1.324(4) . ? 
N4 C41 1.424(3) . ? 
N5 C50 1.322(4) . ? 
N5 C51 1.434(4) . ? 
N6 C50 1.323(4) . ? 
N6 C61 1.389(19) . ? 
N6 C61B 1.52(3) . ? 
N7 C1 1.340(4) . ? 
N7 C71 1.401(4) . ? 
N8 C1 1.347(4) . ? 
N8 C81 1.411(4) . ? 
N9 C2 1.302(4) . ? 
N9 C72 1.389(4) . ? 
N10 C2 1.365(4) . ? 
N10 C82 1.400(4) . ? 
O2 C24 1.373(4) . ? 
O2 C27 1.419(6) . ? 
O3 C34 1.381(4) . ? 
O3 C37 1.407(6) . ? 
O4 C44 1.369(4) . ? 
O4 C47 1.416(5) . ? 
O5 C54 1.381(4) . ? 
O5 C57 1.418(5) . ? 
C1 C2 1.453(4) . ? 
C11 C16 1.368(5) . ? 
C11 C12 1.383(4) . ? 
C12 C13 1.389(5) . ? 
C13 C14 1.368(7) . ? 
C14 C15 1.354(6) . ? 
C14 O1B 1.37(3) . ? 
C14 O1 1.412(16) . ? 
C15 C16 1.389(5) . ? 
O1 C17 1.37(3) . ? 
O1B C17B 1.35(4) . ? 
C21 C26 1.386(4) . ? 
C21 C22 1.387(4) . ? 
C22 C23 1.384(5) . ? 
C24 C23 1.381(5) . ? 
C24 C25 1.381(5) . ? 
C25 C26 1.384(4) . ? 
C31 C32 1.381(4) . ? 
C31 C36 1.398(4) . ? 
C32 C33 1.392(5) . ? 
C33 C34 1.378(5) . ? 
C34 C35 1.371(5) . ? 
C35 C36 1.369(5) . ? 
C41 C42 1.393(4) . ? 
C41 C46 1.397(4) . ? 
C42 C43 1.392(4) . ? 
C43 C44 1.386(5) . ? 
C44 C45 1.385(5) . ? 
C45 C46 1.391(4) . ? 
C51 C52 1.380(4) . ? 
C51 C56 1.388(4) . ? 
C52 C53 1.387(5) . ? 
C53 C54 1.381(5) . ? 
C54 C55 1.378(5) . ? 
C55 C56 1.377(4) . ? 
C61 C66 1.34(3) . ? 
C61 C62 1.41(2) . ? 
C62 C63 1.35(6) . ? 
C63 C64 1.41(5) . ? 
C64 C65 1.338(11) . ? 
C64 O6 1.418(17) . ? 
C65 C66 1.39(3) . ? 
O6 C67 1.394(15) . ? 
C61B C62B 1.34(3) . ? 
C61B C66B 1.44(5) . ? 
C62B C63B 1.46(9) . ? 
C63B C64B 1.35(8) . ? 
C64B O6B 1.34(2) . ? 
C64B C65B 1.359(17) . ? 
C65B C66B 1.37(4) . ? 
O6B C67B 1.45(2) . ? 
C71 C76 1.397(4) . ? 
C71 C72 1.404(4) . ? 
C72 C73 1.400(4) . ? 
C73 C74 1.370(5) . ? 
C74 C75 1.380(5) . ? 
C75 C76 1.376(4) . ? 
C81 C86 1.394(4) . ? 
C81 C82 1.398(4) . ? 
C82 C83 1.394(5) . ? 
C83 C84 1.364(5) . ? 
C84 C85 1.384(5) . ? 
C85 C86 1.384(5) . ? 
 
loop_ 
 _geom_angle_atom_site_label_1 
 _geom_angle_atom_site_label_2 
 _geom_angle_atom_site_label_3 
 _geom_angle 
 _geom_angle_site_symmetry_1 
 _geom_angle_site_symmetry_3 
 _geom_angle_publ_flag 
Mo2 Mo1 N5 92.73(6) . . y 
Mo2 Mo1 N7 92.03(6) . . y 
N5 Mo1 N7 89.31(9) . . y 
Mo2 Mo1 N3 93.60(6) . . y 
N5 Mo1 N3 92.06(9) . . y 
N7 Mo1 N3 174.13(8) . . y 
Mo2 Mo1 N1 92.43(6) . . y 
N5 Mo1 N1 174.55(9) . . y 
N7 Mo1 N1 88.78(9) . . y 
N3 Mo1 N1 89.34(9) . . y
Mo1 Mo2 N2 93.21(6) . . y 
Mo1 Mo2 N4 91.83(6) . . y 
N2 Mo2 N4 89.57(9) . . y 
Mo1 Mo2 N8 93.48(6) . . y 
N2 Mo2 N8 85.15(9) . . y 
N4 Mo2 N8 172.71(9) . . y 
Mo1 Mo2 N6 92.74(6) . . y 
N2 Mo2 N6 173.56(9) . . y 
N4 Mo2 N6 92.69(9) . . y 
N8 Mo2 N6 92.05(9) . . y 
C10 N1 C11 115.3(2) . . ? 
C10 N1 Mo1 116.45(18) . . ? 
C11 N1 Mo1 127.39(18) . . ? 
C10 N2 C21 116.0(2) . . ? 
C10 N2 Mo2 117.16(19) . . ? 
C21 N2 Mo2 125.76(18) . . ? 
C30 N3 C31 118.1(2) . . ? 
C30 N3 Mo1 116.26(19) . . ? 
C31 N3 Mo1 125.60(18) . . ? 
C30 N4 C41 118.0(2) . . ? 
C30 N4 Mo2 118.05(18) . . ? 
C41 N4 Mo2 123.21(18) . . ? 
C50 N5 C51 116.0(2) . . ? 
C50 N5 Mo1 117.10(19) . . ? 
C51 N5 Mo1 126.48(19) . . ? 
C50 N6 C61 112.1(7) . . ? 
C50 N6 C61B 120.4(10) . . ?  
C50 N6 Mo2 116.56(19) . . ? 
C61 N6 Mo2 130.8(7) . . ? 
C61B N6 Mo2 122.7(10) . . ? 
C1 N7 C71 118.2(2) . . ? 
C1 N7 Mo1 118.49(18) . . ? 
C71 N7 Mo1 123.07(18) . . ? 
C1 N8 C81 117.7(2) . . ? 
C1 N8 Mo2 116.97(18) . . ? 
C81 N8 Mo2 123.72(19) . . ? 
C2 N9 C72 116.3(3) . . ? 
C2 N10 C82 122.6(3) . . ? 
C24 O2 C27 116.1(3) . . ? 
C34 O3 C37 117.6(4) . . ? 
C44 O4 C47 117.7(3) . . ? 
C54 O5 C57 116.9(3) . . ? 
N7 C1 N8 118.3(2) . . ? 
N7 C1 C2 118.6(2) . . ? 
N8 C1 C2 123.1(3) . . ? 
N9 C2 N10 118.8(3) . . ? 
N9 C2 C1 124.9(3) . . ? 
N10 C2 C1 116.3(3) . . ? 
N2 C10 N1 120.7(3) . . ? 
C16 C11 C12 117.5(3) . . ? 
C16 C11 N1 121.7(3) . . ? 
C12 C11 N1 120.7(3) . . ? 
C11 C12 C13 119.8(4) . . ? 
C14 C13 C12 121.7(4) . . ? 
C15 C14 O1B 137.9(16) . . ? 
C15 C14 C13 118.7(4) . . ? 
O1B C14 C13 102.4(19) . . ? 
C15 C14 O1 117.9(15) . . ?  
C13 C14 O1 122.9(14) . . ? 
C14 C15 C16 120.0(4) . . ? 
C11 C16 C15 122.2(4) . . ? 
C17 O1 C14 120.8(14) . . ? 
C17B O1B C14 114(2) . . ? 
C26 C21 C22 118.5(3) . . ? 
C26 C21 N2 120.3(3) . . ? 
C22 C21 N2 121.2(3) . . ? 
C23 C22 C21 120.9(3) . . ? 
O2 C24 C23 115.9(3) . . ? 
O2 C24 C25 123.8(3) . . ? 
C23 C24 C25 120.3(3) . . ? 
C24 C25 C26 119.5(3) . . ? 
C25 C26 C21 121.1(3) . . ? 
N4 C30 N3 120.2(3) . . ? 
C32 C31 C36 117.3(3) . . ? 
C32 C31 N3 123.7(3) . . ? 
C36 C31 N3 119.0(3) . . ? 
C31 C32 C33 121.3(3) . . ? 
C34 C33 C32 120.0(3) . . ? 
C35 C34 C33 119.3(3) . . ? 
C35 C34 O3 116.3(3) . . ? 
C33 C34 O3 124.5(4) . . ? 
C36 C35 C34 120.7(3) . . ? 
C35 C36 C31 121.4(3) . . ? 
C42 C41 C46 118.0(3) . . ? 
C42 C41 N4 123.2(3) . . ? 
C46 C41 N4 118.8(3) . . ? 
C43 C42 C41 121.6(3) . . ? 
C44 C43 C42 119.6(3) . . ? 
O4 C44 C45 115.6(3) . . ? 
O4 C44 C43 124.8(3) . . ? 
C45 C44 C43 119.5(3) . . ? 
C44 C45 C46 120.7(3) . . ? 
C45 C46 C41 120.6(3) . . ? 
N5 C50 N6 120.8(3) . . ? 
C52 C51 C56 118.4(3) . . ? 
C52 C51 N5 121.9(3) . . ? 
C56 C51 N5 119.7(3) . . ? 
C51 C52 C53 121.6(3) . . ? 
C54 C53 C52 119.1(3) . . ? 
C55 C54 O5 115.9(3) . . ? 
C55 C54 C53 119.9(3) . . ? 
O5 C54 C53 124.2(3) . . ? 
C56 C55 C54 120.6(3) . . ? 
C55 C56 C51 120.4(3) . . ? 
C66 C61 N6 127.5(9) . . ? 
C66 C61 C62 116.2(16) . . ? 
N6 C61 C62 116.2(13) . . ? 
C63 C62 C61 123.7(19) . . ? 
C62 C63 C64 116(2) . . ? 
C65 C64 C63 122(2) . . ? 
C65 C64 O6 115.7(14) . . ? 
C63 C64 O6 123(2) . . ? 
C64 C65 C66 119.1(15) . . ? 
C61 C66 C65 122.7(10) . . ? 
C67 O6 C64 119.6(11) . . ? 
C62B C61B C66B 121(2) . . ? 
C62B C61B N6 123(2) . . ? 
C66B C61B N6 115.4(13) . . ? 
C61B C62B C63B 115(3) . . ? 
C64B C63B C62B 126(3) . . ? 
O6B C64B C63B 115(3) . . ? 
O6B C64B C65B 129(2) . . ? 
C63B C64B C65B 116(3) . . ? 
C64B C65B C66B 123(3) . . ? 
C65B C66B C61B 119.3(17) . . ? 
C64B O6B C67B 115.2(17) . . ? 
C76 C71 N7 120.4(3) . . ? 
C76 C71 C72 119.1(3) . . ? 
N7 C71 C72 120.5(3) . . ? 
N9 C72 C73 119.4(3) . . ? 
N9 C72 C71 121.4(3) . . ? 
C73 C72 C71 119.2(3) . . ? 
C74 C73 C72 120.7(3) . . ? 
C73 C74 C75 120.0(3) . . ? 
C76 C75 C74 120.7(3) . . ? 
C75 C76 C71 120.2(3) . . ? 
C86 C81 C82 117.7(3) . . ? 
C86 C81 N8 120.8(3) . . ? 
C82 C81 N8 121.6(3) . . ? 
C83 C82 C81 120.3(3) . . ? 
C83 C82 N10 121.7(3) . . ? 
C81 C82 N10 118.0(3) . . ? 
C84 C83 C82 120.6(3) . . ? 
C83 C84 C85 120.2(3) . . ? 
C86 C85 C84 119.4(3) . . ? 
C85 C86 C81 121.7(3) . . ? 
C24 C23 C22 119.6(3) . . ? 
 
_diffrn_measured_fraction_theta_max    0.997 
_diffrn_reflns_theta_full              25.04 
_diffrn_measured_fraction_theta_full   0.997 
_refine_diff_density_max    0.783 
_refine_diff_density_min   -0.350 
_refine_diff_density_rms    0.061 

===============the end of compound 4===============

=============compound 5===========================

data_xl 
 
_audit_creation_method            SHELXL-97 
_chemical_name_systematic 
; 
 ? 
; 
_chemical_name_common             '[Mo2(DAniF)2(O2CCH3)]2C14H8N4,4CH2Cl2' 
_chemical_melting_point           ? 
_chemical_formula_moiety     'C78 H74 Mo4 N12 O12, 4(C H2 Cl2)' 
_chemical_formula_sum 
 'C82 H82 Cl8 Mo4 N12 O12' 
_chemical_formula_weight          2094.96 
 
loop_ 
 _atom_type_symbol 
 _atom_type_description 
 _atom_type_scat_dispersion_real 
 _atom_type_scat_dispersion_imag 
 _atom_type_scat_source 
 'C'  'C'   0.0033   0.0016 
 'International Tables Vol C Tables 4.2.6.8 and 6.1.1.4' 
 'H'  'H'   0.0000   0.0000 
 'International Tables Vol C Tables 4.2.6.8 and 6.1.1.4' 
 'N'  'N'   0.0061   0.0033 
 'International Tables Vol C Tables 4.2.6.8 and 6.1.1.4' 
 'O'  'O'   0.0106   0.0060 
 'International Tables Vol C Tables 4.2.6.8 and 6.1.1.4' 
 'Mo'  'Mo'  -1.6832   0.6857 
 'International Tables Vol C Tables 4.2.6.8 and 6.1.1.4' 
 'Cl'  'Cl'   0.1484   0.1585 
 'International Tables Vol C Tables 4.2.6.8 and 6.1.1.4' 
 
_symmetry_cell_setting            'triclinic' 
_symmetry_space_group_name_H-M    'P-1' 
 
loop_ 
 _symmetry_equiv_pos_as_xyz 
 'x, y, z' 
 '-x, -y, -z' 
 
_cell_length_a                    10.533(2) 
_cell_length_b                    14.862(3) 
_cell_length_c                    15.070(3) 
_cell_angle_alpha                 89.761(4) 
_cell_angle_beta                  73.296(4) 
_cell_angle_gamma                 75.536(4) 
_cell_volume                      2182.0(9) 
_cell_formula_units_Z             1 
_cell_measurement_temperature     213(2) 
_cell_measurement_reflns_used     4300 
_cell_measurement_theta_min       2.15 
_cell_measurement_theta_max       27.21 
 
_exptl_crystal_description        niddle 
_exptl_crystal_colour             orange 
_exptl_crystal_size_max           0.31 
_exptl_crystal_size_mid           0.06 
_exptl_crystal_size_min           0.06 
_exptl_crystal_density_meas       ? 
_exptl_crystal_density_diffrn     1.594 
_exptl_crystal_density_method     'not measured' 
_exptl_crystal_F_000              1058 
_exptl_absorpt_coefficient_mu     0.873 
_exptl_absorpt_correction_type    'multi-scan' 
_exptl_absorpt_correction_T_min   0.7724 
_exptl_absorpt_correction_T_max   0.9479 
_exptl_absorpt_process_details    SADABS
 
_exptl_special_details 
; 
 ? 
; 
 
_diffrn_ambient_temperature       213(2) 
_diffrn_radiation_wavelength      0.71073 
_diffrn_radiation_type            MoK\a 
_diffrn_radiation_source          'normal-focus sealed tube' 
_diffrn_radiation_monochromator   graphite 
_diffrn_measurement_device_type   'BRUKER SMART 1000' 
_diffrn_measurement_method        '\w-scans' 
_diffrn_detector_area_resol_mean  ? 
_diffrn_standards_number          'None (area detector data)' 
_diffrn_standards_interval_count  ? 
_diffrn_standards_interval_time   ? 
_diffrn_standards_decay_%         ? 
_diffrn_reflns_number             8818 
_diffrn_reflns_av_R_equivalents   0.0277 
_diffrn_reflns_av_sigmaI/netI     0.0540 
_diffrn_reflns_limit_h_min        -11 
_diffrn_reflns_limit_h_max        11 
_diffrn_reflns_limit_k_min        -13 
_diffrn_reflns_limit_k_max        16 
_diffrn_reflns_limit_l_min        -16 
_diffrn_reflns_limit_l_max        15 
_diffrn_reflns_theta_min          1.93 
_diffrn_reflns_theta_max          25.0 
_reflns_number_total              7480 
_reflns_number_gt                 5160 
_reflns_threshold_expression      >2sigma(I) 
 
_computing_data_collection        SMART 
_computing_cell_refinement        SAINT 
_computing_data_reduction         SAINT
_computing_structure_solution     'SHELXS-97 (Sheldrick, 1990)' 
_computing_structure_refinement   'SHELXL-97 (Sheldrick, 1997)' 
_computing_molecular_graphics     XP
_computing_publication_material   CIFTAB
 
_refine_special_details 
; 
 Refinement of F^2^ against ALL reflections.  The weighted R-factor wR and 
 goodness of fit S are based on F^2^, conventional R-factors R are based 
 on F, with F set to zero for negative F^2^. The threshold expression of 
 F^2^ > 2sigma(F^2^) is used only for calculating R-factors(gt) etc. and is 
 not relevant to the choice of reflections for refinement.  R-factors based 
 on F^2^ are statistically about twice as large as those based on F, and R- 
 factors based on ALL data will be even larger. 
; 
 
_refine_ls_structure_factor_coef  Fsqd  
_refine_ls_matrix_type            full 
_refine_ls_weighting_scheme       calc  
_refine_ls_weighting_details 
 'calc w=1/[\s^2^(Fo^2^)+(0.0856P)^2^+5.3166P] where P=(Fo^2^+2Fc^2^)/3' 
_atom_sites_solution_primary      direct 
_atom_sites_solution_secondary    difmap 
_atom_sites_solution_hydrogens    geom 
_refine_ls_hydrogen_treatment     noref
_refine_ls_extinction_method      none 
_refine_ls_extinction_coef        ? 
_refine_ls_number_reflns          5660 
_refine_ls_number_parameters      484 
_refine_ls_number_restraints      4 
_refine_ls_R_factor_all           0.0922 
_refine_ls_R_factor_gt            0.0582 
_refine_ls_wR_factor_ref          0.1653 
_refine_ls_wR_factor_gt           0.1446 
_refine_ls_goodness_of_fit_ref    1.017 
_refine_ls_restrained_S_all       1.016 
_refine_ls_shift/su_max           0.002 
_refine_ls_shift/su_mean          0.000 
 
loop_ 
 _atom_site_label 
 _atom_site_type_symbol 
 _atom_site_fract_x 
 _atom_site_fract_y 
 _atom_site_fract_z 
 _atom_site_U_iso_or_equiv 
 _atom_site_adp_type 
 _atom_site_occupancy 
 _atom_site_symmetry_multiplicity 
 _atom_site_calc_flag 
 _atom_site_refinement_flags 
 _atom_site_disorder_assembly 
 _atom_site_disorder_group 
Mo2 Mo 0.58044(5) 0.21470(3) -0.09862(4) 0.02509(17) Uani 1 1 d . . . 
Mo1 Mo 0.73482(5) 0.10456(3) -0.17847(4) 0.02449(17) Uani 1 1 d . . . 
O3 O 0.8694(6) -0.1814(5) -0.5688(4) 0.080(2) Uani 1 1 d . . . 
O4 O -0.0467(5) 0.4810(3) -0.1188(5) 0.0657(18) Uani 1 1 d . . . 
O5 O 0.8173(4) 0.1968(3) -0.2734(3) 0.0345(11) Uani 1 1 d . . . 
O6 O 0.6610(4) 0.3154(3) -0.1831(3) 0.0349(11) Uani 1 1 d . . . 
O7 O 1.4080(4) -0.1095(4) -0.2634(3) 0.0444(13) Uani 1 1 d . . . 
O8 O 0.4931(6) 0.4901(4) 0.2964(4) 0.0556(15) Uani 1 1 d . . . 
N1 N 0.6589(5) 0.0042(3) -0.0913(3) 0.0225(11) Uani 1 1 d . . . 
N2 N 0.4767(5) 0.1254(3) -0.0119(3) 0.0240(11) Uani 1 1 d . . . 
N3 N 0.6207(5) 0.0892(4) -0.2718(4) 0.0293(12) Uani 1 1 d . . . 
N4 N 0.4530(5) 0.2132(3) -0.1861(4) 0.0282(12) Uani 1 1 d . . . 
N7 N 0.8794(5) 0.1174(4) -0.1070(4) 0.0283(12) Uani 1 1 d . . . 
N8 N 0.7061(5) 0.2320(3) -0.0121(4) 0.0296(12) Uani 1 1 d . . . 
C1 C 0.5337(6) 0.0325(4) -0.0261(4) 0.0214(13) Uani 1 1 d . . . 
C2 C 0.7225(6) -0.0920(4) -0.0997(4) 0.0253(14) Uani 1 1 d . . . 
C3 C 0.8576(7) -0.1242(5) -0.1592(5) 0.0366(16) Uani 1 1 d . . . 
H3A H 0.9028 -0.0823 -0.1917 0.044 Uiso 1 1 calc R . . 
C4 C 0.9231(7) -0.2185(5) -0.1692(5) 0.0399(18) Uani 1 1 d . . . 
H4A H 1.0119 -0.2399 -0.2090 0.048 Uiso 1 1 calc R . . 
C5 C 0.3431(6) 0.1551(4) 0.0490(4) 0.0230(13) Uani 1 1 d . . . 
C6 C 0.2749(7) 0.2494(4) 0.0630(5) 0.0347(16) Uani 1 1 d . . . 
H6A H 0.3196 0.2925 0.0327 0.042 Uiso 1 1 calc R . . 
C7 C 0.1424(7) 0.2802(5) 0.1208(5) 0.0427(18) Uani 1 1 d . . . 
H7A H 0.0973 0.3433 0.1269 0.051 Uiso 1 1 calc R . . 
C30 C 0.5001(6) 0.1500(4) -0.2579(5) 0.0316(15) Uani 1 1 d . . . 
H30A H 0.4485 0.1486 -0.2983 0.038 Uiso 1 1 calc R . . 
C31 C 0.6771(4) 0.0245(3) -0.3528(3) 0.0325(15) Uani 1 1 d G . . 
C32 C 0.8191(4) -0.0083(4) -0.3849(4) 0.070(3) Uani 1 1 d G . . 
H32A H 0.8737 0.0151 -0.3572 0.084 Uiso 1 1 calc R . . 
C33 C 0.8797(3) -0.0761(4) -0.4585(4) 0.078(3) Uani 1 1 d G . . 
H33A H 0.9747 -0.0980 -0.4799 0.093 Uiso 1 1 calc R . . 
C34 C 0.7981(5) -0.1111(4) -0.4999(3) 0.051(2) Uani 1 1 d G . . 
C35 C 0.6561(5) -0.0783(4) -0.4678(4) 0.054(2) Uani 1 1 d G . . 
H35A H 0.6015 -0.1017 -0.4955 0.065 Uiso 1 1 calc R . . 
C36 C 0.5955(3) -0.0105(3) -0.3943(3) 0.0453(19) Uani 1 1 d G . . 
H36A H 0.5005 0.0115 -0.3728 0.054 Uiso 1 1 calc R . . 
C37 C 0.7934(11) -0.2230(8) -0.6109(8) 0.106(5) Uani 1 1 d . . . 
H37A H 0.8549 -0.2692 -0.6585 0.158 Uiso 1 1 calc R . . 
H37B H 0.7379 -0.1763 -0.6379 0.158 Uiso 1 1 calc R . . 
H37C H 0.7354 -0.2519 -0.5651 0.158 Uiso 1 1 calc R . . 
C41 C 0.3235(3) 0.2791(2) -0.1733(3) 0.0294(15) Uani 1 1 d G . . 
C42 C 0.3183(3) 0.3735(3) -0.1724(4) 0.052(2) Uani 1 1 d G . . 
H42A H 0.3989 0.3925 -0.1841 0.062 Uiso 1 1 calc R . . 
C43 C 0.1927(4) 0.4394(2) -0.1539(4) 0.060(3) Uani 1 1 d G . . 
H43A H 0.1892 0.5026 -0.1532 0.073 Uiso 1 1 calc R . . 
C44 C 0.0722(3) 0.4110(2) -0.1363(4) 0.0406(18) Uani 1 1 d G . . 
C45 C 0.0774(3) 0.3166(3) -0.1372(4) 0.046(2) Uani 1 1 d G . . 
H45A H -0.0032 0.2976 -0.1254 0.056 Uiso 1 1 calc R . . 
C46 C 0.2030(4) 0.2507(2) -0.1557(4) 0.0443(19) Uani 1 1 d G . . 
H46A H 0.2065 0.1875 -0.1563 0.053 Uiso 1 1 calc R . . 
C47 C -0.1706(8) 0.4584(6) -0.0755(8) 0.075(3) Uani 1 1 d . . . 
H47A H -0.2456 0.5129 -0.0672 0.112 Uiso 1 1 calc R . . 
H47B H -0.1688 0.4356 -0.0161 0.112 Uiso 1 1 calc R . . 
H47C H -0.1820 0.4112 -0.1136 0.112 Uiso 1 1 calc R . . 
C50 C 0.7617(7) 0.2845(5) -0.2544(5) 0.0372(17) Uani 1 1 d . . . 
C51 C 0.8190(9) 0.3503(6) -0.3186(7) 0.066(3) Uani 1 1 d . . . 
H51A H 0.8954 0.3158 -0.3684 0.099 Uiso 1 1 calc R . . 
H51B H 0.8493 0.3915 -0.2853 0.099 Uiso 1 1 calc R . . 
H51C H 0.7495 0.3859 -0.3436 0.099 Uiso 1 1 calc R . . 
C70 C 0.8369(6) 0.1816(4) -0.0375(5) 0.0292(15) Uani 1 1 d . . . 
H70A H 0.8971 0.1918 -0.0064 0.035 Uiso 1 1 calc R . . 
C71 C 1.0224(3) 0.0682(3) -0.1431(3) 0.0277(14) Uani 1 1 d G . . 
C72 C 1.0716(4) 0.0427(3) -0.2379(3) 0.0383(17) Uani 1 1 d G . . 
H72A H 1.0165 0.0640 -0.2760 0.046 Uiso 1 1 calc R . . 
C73 C 1.2032(4) -0.0147(3) -0.2757(2) 0.0426(18) Uani 1 1 d G . . 
H73A H 1.2361 -0.0318 -0.3391 0.051 Uiso 1 1 calc R . . 
C74 C 1.2856(3) -0.0465(3) -0.2188(3) 0.0350(16) Uani 1 1 d G . . 
C75 C 1.2364(4) -0.0210(3) -0.1240(3) 0.0330(16) Uani 1 1 d G . . 
H75A H 1.2915 -0.0423 -0.0860 0.040 Uiso 1 1 calc R . . 
C76 C 1.1048(4) 0.0363(3) -0.0862(2) 0.0295(15) Uani 1 1 d G . . 
H76A H 1.0719 0.0534 -0.0228 0.035 Uiso 1 1 calc R . . 
C77 C 1.5075(7) -0.1334(5) -0.2128(5) 0.0455(19) Uani 1 1 d . . . 
H77A H 1.5883 -0.1775 -0.2504 0.068 Uiso 1 1 calc R . . 
H77B H 1.4693 -0.1603 -0.1566 0.068 Uiso 1 1 calc R . . 
H77C H 1.5313 -0.0783 -0.1978 0.068 Uiso 1 1 calc R . . 
C81 C 0.6595(4) 0.2982(2) 0.0675(2) 0.0297(15) Uani 1 1 d G . . 
C82 C 0.5597(4) 0.3796(3) 0.0676(2) 0.0325(15) Uani 1 1 d G . . 
H82A H 0.5285 0.3917 0.0159 0.039 Uiso 1 1 calc R . . 
C83 C 0.5067(4) 0.4430(2) 0.1451(3) 0.0382(17) Uani 1 1 d G . . 
H83A H 0.4399 0.4974 0.1452 0.046 Uiso 1 1 calc R . . 
C84 C 0.5534(5) 0.4249(3) 0.2224(3) 0.0390(17) Uani 1 1 d G . . 
C85 C 0.6532(5) 0.3435(3) 0.2222(3) 0.0433(18) Uani 1 1 d G . . 
H85A H 0.6844 0.3314 0.2739 0.052 Uiso 1 1 calc R . . 
C86 C 0.7062(4) 0.2801(2) 0.1448(3) 0.0365(16) Uani 1 1 d G . . 
H86A H 0.7730 0.2256 0.1447 0.044 Uiso 1 1 calc R . . 
C87 C 0.5413(13) 0.4763(7) 0.3750(7) 0.104(5) Uani 1 1 d . . . 
H87A H 0.4906 0.5264 0.4215 0.155 Uiso 1 1 calc R . . 
H87B H 0.6370 0.4748 0.3574 0.155 Uiso 1 1 calc R . . 
H87C H 0.5290 0.4183 0.3995 0.155 Uiso 1 1 calc R . . 
Cl1 Cl 0.5556(6) 0.2682(4) -0.4571(4) 0.186(2) Uani 1 1 d D . . 
Cl2 Cl 0.8165(5) 0.2398(5) -0.5821(4) 0.225(3) Uani 1 1 d D . . 
Cl3 Cl 0.9753(14) 0.4436(9) -0.6367(9) 0.391(6) Uani 1 1 d D . . 
Cl4 Cl 1.2328(12) 0.3694(8) -0.6336(10) 0.391(7) Uani 1 1 d D . . 
C1S C 0.681(3) 0.1996(11) -0.5208(14) 0.301(19) Uani 1 1 d D . . 
H1SA H 0.6502 0.1699 -0.5651 0.361 Uiso 1 1 calc R . . 
H1SB H 0.7144 0.1515 -0.4834 0.361 Uiso 1 1 calc R . . 
C2S C 1.097(3) 0.374(4) -0.583(3) 0.63(6) Uani 1 1 d D . . 
H2SA H 1.0787 0.4005 -0.5205 0.760 Uiso 1 1 calc R . . 
H2SB H 1.0847 0.3112 -0.5784 0.760 Uiso 1 1 calc R . . 
 
loop_ 
 _atom_site_aniso_label 
 _atom_site_aniso_U_11 
 _atom_site_aniso_U_22 
 _atom_site_aniso_U_33 
 _atom_site_aniso_U_23 
 _atom_site_aniso_U_13 
 _atom_site_aniso_U_12 
Mo2 0.0169(3) 0.0197(3) 0.0373(4) 0.0015(2) -0.0081(2) -0.0023(2) 
Mo1 0.0148(3) 0.0232(3) 0.0339(4) 0.0020(2) -0.0070(2) -0.0024(2) 
O3 0.052(4) 0.106(5) 0.061(4) -0.040(4) -0.013(3) 0.015(4) 
O4 0.021(3) 0.035(3) 0.129(6) 0.008(3) -0.015(3) 0.005(2) 
O5 0.021(2) 0.035(3) 0.043(3) 0.008(2) -0.004(2) -0.005(2) 
O6 0.027(3) 0.028(2) 0.045(3) 0.007(2) -0.007(2) -0.004(2) 
O7 0.020(2) 0.060(3) 0.048(3) -0.002(3) -0.014(2) 0.004(2) 
O8 0.069(4) 0.045(3) 0.044(3) -0.013(3) -0.017(3) 0.001(3) 
N1 0.015(2) 0.024(3) 0.024(3) -0.004(2) -0.005(2) 0.000(2) 
N2 0.014(2) 0.021(2) 0.030(3) -0.005(2) -0.002(2) 0.001(2) 
N3 0.019(3) 0.031(3) 0.033(3) -0.001(2) -0.007(2) 0.001(2) 
N4 0.021(3) 0.026(3) 0.036(3) 0.006(2) -0.011(2) 0.000(2) 
N7 0.019(3) 0.032(3) 0.035(3) 0.002(2) -0.008(2) -0.008(2) 
N8 0.024(3) 0.025(3) 0.039(3) -0.001(2) -0.007(2) -0.006(2) 
C1 0.020(3) 0.022(3) 0.021(3) 0.002(2) -0.009(3) -0.001(2) 
C2 0.020(3) 0.022(3) 0.031(4) -0.003(3) -0.008(3) 0.001(2) 
C3 0.023(3) 0.032(4) 0.048(5) 0.001(3) -0.002(3) -0.007(3) 
C4 0.019(3) 0.030(4) 0.055(5) -0.004(3) 0.002(3) 0.005(3) 
C5 0.016(3) 0.023(3) 0.031(4) 0.003(3) -0.009(3) -0.005(2) 
C6 0.025(4) 0.026(3) 0.046(4) 0.001(3) -0.003(3) -0.003(3) 
C7 0.029(4) 0.027(4) 0.057(5) 0.003(3) -0.005(4) 0.011(3) 
C30 0.025(3) 0.032(3) 0.039(4) 0.004(3) -0.012(3) -0.005(3) 
C31 0.030(4) 0.040(4) 0.027(4) 0.006(3) -0.011(3) -0.005(3) 
C32 0.032(4) 0.091(7) 0.078(7) -0.040(6) -0.017(4) 0.004(4) 
C33 0.029(4) 0.107(8) 0.081(7) -0.041(6) -0.010(5) 0.003(5) 
C34 0.045(5) 0.061(5) 0.036(5) -0.010(4) -0.007(4) 0.005(4) 
C35 0.040(5) 0.068(6) 0.053(5) -0.014(4) -0.018(4) -0.007(4) 
C36 0.024(4) 0.052(5) 0.055(5) -0.010(4) -0.011(3) -0.002(3) 
C37 0.078(8) 0.121(10) 0.108(9) -0.056(8) -0.051(7) 0.022(7) 
C41 0.023(3) 0.026(3) 0.037(4) 0.001(3) -0.010(3) -0.002(3) 
C42 0.026(4) 0.033(4) 0.097(7) 0.016(4) -0.019(4) -0.007(3) 
C43 0.030(4) 0.024(4) 0.121(8) 0.007(4) -0.015(5) -0.004(3) 
C44 0.026(4) 0.032(4) 0.059(5) 0.005(3) -0.012(3) 0.002(3) 
C45 0.020(4) 0.035(4) 0.080(6) 0.007(4) -0.012(4) -0.005(3) 
C46 0.031(4) 0.023(3) 0.080(6) 0.004(3) -0.020(4) -0.004(3) 
C47 0.020(4) 0.067(6) 0.125(9) -0.009(6) -0.009(5) -0.003(4) 
C50 0.028(4) 0.033(4) 0.050(5) 0.012(3) -0.010(4) -0.009(3) 
C51 0.042(5) 0.050(5) 0.087(7) 0.028(5) 0.006(5) -0.007(4) 
C70 0.025(3) 0.022(3) 0.041(4) 0.003(3) -0.011(3) -0.005(3) 
C71 0.018(3) 0.028(3) 0.042(4) 0.000(3) -0.012(3) -0.011(3) 
C72 0.017(3) 0.053(4) 0.046(5) -0.004(3) -0.015(3) -0.005(3) 
C73 0.031(4) 0.059(5) 0.036(4) -0.002(4) -0.011(3) -0.007(3) 
C74 0.021(3) 0.035(4) 0.049(5) 0.001(3) -0.014(3) -0.003(3) 
C75 0.027(4) 0.037(4) 0.041(4) 0.008(3) -0.019(3) -0.008(3) 
C76 0.026(3) 0.029(3) 0.034(4) -0.002(3) -0.010(3) -0.007(3) 
C77 0.020(4) 0.057(5) 0.055(5) 0.005(4) -0.015(3) 0.002(3) 
C81 0.023(3) 0.026(3) 0.041(4) -0.001(3) -0.009(3) -0.007(3) 
C82 0.025(3) 0.028(3) 0.043(4) 0.001(3) -0.010(3) -0.006(3) 
C83 0.028(4) 0.025(3) 0.053(5) -0.005(3) -0.005(3) -0.001(3) 
C84 0.045(4) 0.032(4) 0.040(4) -0.002(3) -0.012(4) -0.010(3) 
C85 0.054(5) 0.035(4) 0.046(5) 0.000(3) -0.026(4) -0.007(3) 
C86 0.033(4) 0.026(3) 0.053(5) 0.000(3) -0.021(3) -0.005(3) 
C87 0.149(12) 0.082(8) 0.057(7) -0.032(6) -0.046(7) 0.029(7) 
Cl1 0.153(4) 0.176(5) 0.202(5) 0.094(4) -0.010(4) -0.047(4) 
Cl2 0.116(4) 0.340(8) 0.180(5) 0.161(5) -0.022(3) -0.015(4) 
Cl3 0.413(17) 0.394(15) 0.438(17) 0.083(13) -0.187(15) -0.164(14) 
Cl4 0.261(11) 0.335(13) 0.509(19) 0.039(12) 0.005(12) -0.096(10) 
C1S 0.38(3) 0.080(11) 0.22(2) 0.014(12) 0.21(2) -0.017(15) 
C2S 0.19(3) 1.19(15) 0.60(8) 0.73(10) -0.16(4) -0.28(5) 
 
_geom_special_details 
; 
 All esds (except the esd in the dihedral angle between two l.s. planes) 
 are estimated using the full covariance matrix.  The cell esds are taken 
 into account individually in the estimation of esds in distances, angles 
 and torsion angles; correlations between esds in cell parameters are only 
 used when they are defined by crystal symmetry.  An approximate (isotropic) 
 treatment of cell esds is used for estimating esds involving l.s. planes. 
; 
 
loop_ 
 _geom_bond_atom_site_label_1 
 _geom_bond_atom_site_label_2 
 _geom_bond_distance 
 _geom_bond_site_symmetry_2 
 _geom_bond_publ_flag 
Mo2 Mo1 2.0818(8) . y 
Mo2 N2 2.133(5) . y 
Mo2 N4 2.138(5) . y 
Mo2 O6 2.139(5) . y 
Mo2 N8 2.164(5) . y 
Mo1 O5 2.132(4) . y 
Mo1 N1 2.137(5) . y 
Mo1 N3 2.141(5) . y 
Mo1 N7 2.146(5) . y 
O3 C34 1.380(6) . ? 
O3 C37 1.403(11) . ? 
O4 C44 1.372(5) . ? 
O4 C47 1.403(10) . ? 
O5 C50 1.284(8) . ? 
O6 C50 1.263(8) . ? 
O7 C74 1.377(5) . ? 
O7 C77 1.442(8) . ? 
O8 C84 1.371(5) . ? 
O8 C87 1.412(11) . ? 
N1 C1 1.365(7) . ? 
N1 C2 1.408(7) . ? 
N2 C1 1.352(7) . ? 
N2 C5 1.403(7) . ? 
N3 C30 1.322(8) . ? 
N3 C31 1.441(6) . ? 
N4 C30 1.329(8) . ? 
N4 C41 1.428(5) . ? 
N7 C70 1.317(8) . ? 
N7 C71 1.442(6) . ? 
N8 C70 1.337(8) . ? 
N8 C81 1.442(6) . ? 
C1 C1 1.440(12) 2_655 ? 
C2 C5 1.399(8) 2_655 ? 
C2 C3 1.410(9) . ? 
C3 C4 1.386(9) . ? 
C4 C7 1.367(10) 2_655 ? 
C5 C6 1.391(8) . ? 
C5 C2 1.399(8) 2_655 ? 
C6 C7 1.379(9) . ? 
C7 C4 1.367(10) 2_655 ? 
C31 C32 1.3900 . ? 
C31 C36 1.3900 . ? 
C32 C33 1.3900 . ? 
C33 C34 1.3900 . ? 
C34 C35 1.3900 . ? 
C35 C36 1.3900 . ? 
C41 C42 1.3900 . ? 
C41 C46 1.3900 . ? 
C42 C43 1.3900 . ? 
C43 C44 1.3900 . ? 
C44 C45 1.3900 . ? 
C45 C46 1.3900 . ? 
C50 C51 1.486(10) . ? 
C71 C72 1.3900 . ? 
C71 C76 1.3900 . ? 
C72 C73 1.3900 . ? 
C73 C74 1.3900 . ? 
C74 C75 1.3900 . ? 
C75 C76 1.3900 . ? 
C81 C82 1.3900 . ? 
C81 C86 1.3900 . ? 
C82 C83 1.3900 . ? 
C83 C84 1.3900 . ? 
C84 C85 1.3900 . ? 
C85 C86 1.3900 . ? 
Cl1 C1S 1.519(16) . ? 
Cl2 C1S 1.71(2) . ? 
Cl3 C2S 1.82(3) . ? 
Cl4 C2S 1.40(3) . ? 
 
loop_ 
 _geom_angle_atom_site_label_1 
 _geom_angle_atom_site_label_2 
 _geom_angle_atom_site_label_3 
 _geom_angle 
 _geom_angle_site_symmetry_1 
 _geom_angle_site_symmetry_3 
 _geom_angle_publ_flag 
Mo1 Mo2 N2 93.66(12) . . ? 
Mo1 Mo2 N4 92.11(13) . . ? 
N2 Mo2 N4 88.23(19) . . ? 
Mo1 Mo2 O6 92.11(12) . . ? 
N2 Mo2 O6 173.22(17) . . ? 
N4 Mo2 O6 88.00(19) . . ? 
Mo1 Mo2 N8 91.68(13) . . ? 
N2 Mo2 N8 96.33(19) . . ? 
N4 Mo2 N8 173.87(19) . . ? 
O6 Mo2 N8 87.05(19) . . ? 
Mo2 Mo1 O5 91.62(12) . . ? 
Mo2 Mo1 N1 92.20(12) . . ? 
O5 Mo1 N1 175.81(17) . . ? 
Mo2 Mo1 N3 93.59(13) . . ? 
O5 Mo1 N3 85.88(19) . . ? 
N1 Mo1 N3 92.17(19) . . ? 
Mo2 Mo1 N7 93.74(14) . . ? 
O5 Mo1 N7 86.81(19) . . ? 
N1 Mo1 N7 94.65(19) . . ? 
N3 Mo1 N7 169.78(19) . . ? 
C34 O3 C37 117.8(6) . . ? 
C44 O4 C47 117.5(6) . . ? 
C50 O5 Mo1 117.3(4) . . ? 
C50 O6 Mo2 117.0(4) . . ? 
C74 O7 C77 116.6(5) . . ? 
C84 O8 C87 117.9(6) . . ? 
C1 N1 C2 115.9(5) . . ? 
C1 N1 Mo1 118.6(4) . . ? 
C2 N1 Mo1 125.3(4) . . ? 
C1 N2 C5 117.0(5) . . ? 
C1 N2 Mo2 118.1(4) . . ? 
C5 N2 Mo2 124.1(4) . . ? 
C30 N3 C31 120.4(5) . . ? 
C30 N3 Mo1 116.5(4) . . ? 
C31 N3 Mo1 122.7(3) . . ? 
C30 N4 C41 118.9(5) . . ? 
C30 N4 Mo2 117.8(4) . . ? 
C41 N4 Mo2 123.2(4) . . ? 
C70 N7 C71 121.2(5) . . ? 
C70 N7 Mo1 117.3(4) . . ? 
C71 N7 Mo1 120.8(3) . . ? 
C70 N8 C81 118.4(5) . . ? 
C70 N8 Mo2 117.6(4) . . ? 
C81 N8 Mo2 123.9(3) . . ? 
N2 C1 N1 116.5(5) . . ? 
N2 C1 C1 121.5(6) . 2_655 ? 
N1 C1 C1 122.1(6) . 2_655 ? 
C5 C2 N1 121.9(5) 2_655 . ? 
C5 C2 C3 119.7(5) 2_655 . ? 
N1 C2 C3 118.4(6) . . ? 
C4 C3 C2 119.9(6) . . ? 
C7 C4 C3 120.2(6) 2_655 . ? 
C6 C5 C2 118.5(6) . 2_655 ? 
C6 C5 N2 120.2(6) . . ? 
C2 C5 N2 121.3(5) 2_655 . ? 
C7 C6 C5 121.3(6) . . ? 
C4 C7 C6 120.3(6) 2_655 . ? 
N3 C30 N4 119.9(6) . . ? 
C32 C31 C36 120.0 . . ? 
C32 C31 N3 117.1(3) . . ? 
C36 C31 N3 122.7(3) . . ? 
C33 C32 C31 120.0 . . ? 
C32 C33 C34 120.0 . . ? 
O3 C34 C35 125.3(4) . . ? 
O3 C34 C33 114.7(4) . . ? 
C35 C34 C33 120.0 . . ? 
C36 C35 C34 120.0 . . ? 
C35 C36 C31 120.0 . . ? 
C42 C41 C46 120.0 . . ? 
C42 C41 N4 118.7(3) . . ? 
C46 C41 N4 121.2(3) . . ? 
C41 C42 C43 120.0 . . ? 
C44 C43 C42 120.0 . . ? 
O4 C44 C43 115.8(4) . . ? 
O4 C44 C45 124.2(4) . . ? 
C43 C44 C45 120.0 . . ? 
C46 C45 C44 120.0 . . ? 
C45 C46 C41 120.0 . . ? 
O6 C50 O5 121.7(6) . . ? 
O6 C50 C51 120.0(6) . . ? 
O5 C50 C51 118.3(7) . . ? 
N7 C70 N8 119.3(6) . . ? 
C72 C71 C76 120.0 . . ? 
C72 C71 N7 116.8(3) . . ? 
C76 C71 N7 122.7(3) . . ? 
C71 C72 C73 120.0 . . ? 
C74 C73 C72 120.0 . . ? 
O7 C74 C73 114.0(3) . . ? 
O7 C74 C75 125.7(3) . . ? 
C73 C74 C75 120.0 . . ? 
C74 C75 C76 120.0 . . ? 
C75 C76 C71 120.0 . . ? 
C82 C81 C86 120.0 . . ? 
C82 C81 N8 118.2(3) . . ? 
C86 C81 N8 121.7(3) . . ? 
C81 C82 C83 120.0 . . ? 
C82 C83 C84 120.0 . . ? 
O8 C84 C85 123.9(4) . . ? 
O8 C84 C83 116.0(4) . . ? 
C85 C84 C83 120.0 . . ? 
C84 C85 C86 120.0 . . ? 
C85 C86 C81 120.0 . . ? 
Cl1 C1S Cl2 118.8(11) . . ? 
Cl4 C2S Cl3 112(2) . . ? 
 
_diffrn_measured_fraction_theta_max    0.973 
_diffrn_reflns_theta_full              25.00 
_diffrn_measured_fraction_theta_full   0.973 
_refine_diff_density_max    1.205 
_refine_diff_density_min   -0.908 
_refine_diff_density_rms    0.130 

=============the end of compound 5===================
